# Supplementary material
Source: PubMed Central journal article supplement (PMC4826332)

# Supporting Information I

## **A Ligand-Based Drug Design, Discovery of 4-Trifluoromethyl-7,8-Pyrano-coumarin as a Selective Inhibitor of Human Cytochrome P450 1A2**

Jiawang Liu, Peter T. Pham, Elena V. Skripnikova, Shilong Zheng, La'nese J. Lovings, Yuji Wang, Navneet Goyal, Sydney M. Bellow, Lydia M. Mensah, Amari J. Chatters, Melyssa R. Bratton, Thomas E. Wiese, Ming Zhao, Guangdi Wang, and Maryam Foroozesh

### **Contents**

- **$^1\text{H}$  NMR and  $^{13}\text{C}$  NMR Spectra of all the Tested Compounds and Critical Intermediates** S2-S49
- **Elemental Analysis of all the Tested Compounds** S50-S56
- **Structures of P450 1A2 Inhibitors Used for Alignment Study** S57
- **Alamar Blue Cell Viability Assay** S58

7,8-furanoflavone

8.076  
8.047  
7.955  
7.948  
7.935  
7.923

7.548  
7.540  
7.529  
7.526  
7.459  
7.457  
7.430  
7.428

6.850  
6.801

8.076  
8.047  
7.955  
7.948  
7.935  
7.923  
7.548  
7.540  
7.529  
7.526  
7.459  
7.457  
7.430  
7.428  
6.850  
6.801

2.539  
2.537

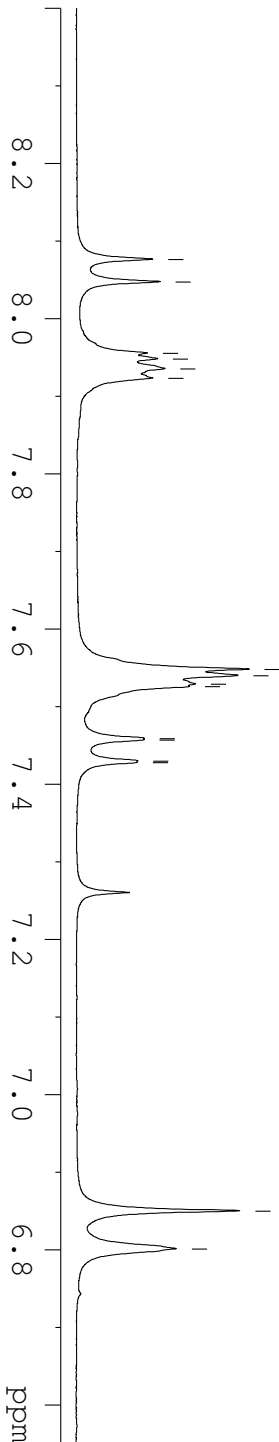

1.010

2.051

4.034

2.006

3.000

8.5  
8.0  
7.5  
7.0  
6.5  
6.0  
5.5  
5.0  
4.5  
4.0  
3.5  
3.0  
2.5  
2.0  
1.5  
1.0  
ppm

Current Data Parameters  
NAME 7,8-furanoflavone  
EXPNO 1  
PROCNO 1

F2 - Acquisition Parameters

Date\_ 20130320  
Time 10.53  
INSTRUM FOURIER300  
PROBHD 5 mm DUL 13C-1  
PULPROG zg30  
TD 65536  
SOLVENT CDCl3  
NS 16  
DS 2  
SWH 6103.516 Hz  
FIDRES 0.093132 Hz  
AQ 5.3687091 sec  
RG 51.8481  
DW 81.920 usec  
DE 6.50 usec  
TE 296.5 K  
D1 1.00000000 sec  
TD0 1

==== CHANNEL f1 =====  
SF01 300.1818537 MHz  
NUC1 1H  
P1 8.75 usec  
PLW1 25.00000000 W

F2 - Processing parameters

SI 65536  
SF 300.1800049 MHz  
WDW EM  
SSB 0  
LB 0.30 Hz  
GB 0  
PC 1.00

7,8-Furanoflavone

Current Data Parameters  
 NAME 7,8-furanoflavone  
 EXPNO 2  
 PROCNO 1

F2 - Acquisition Parameters

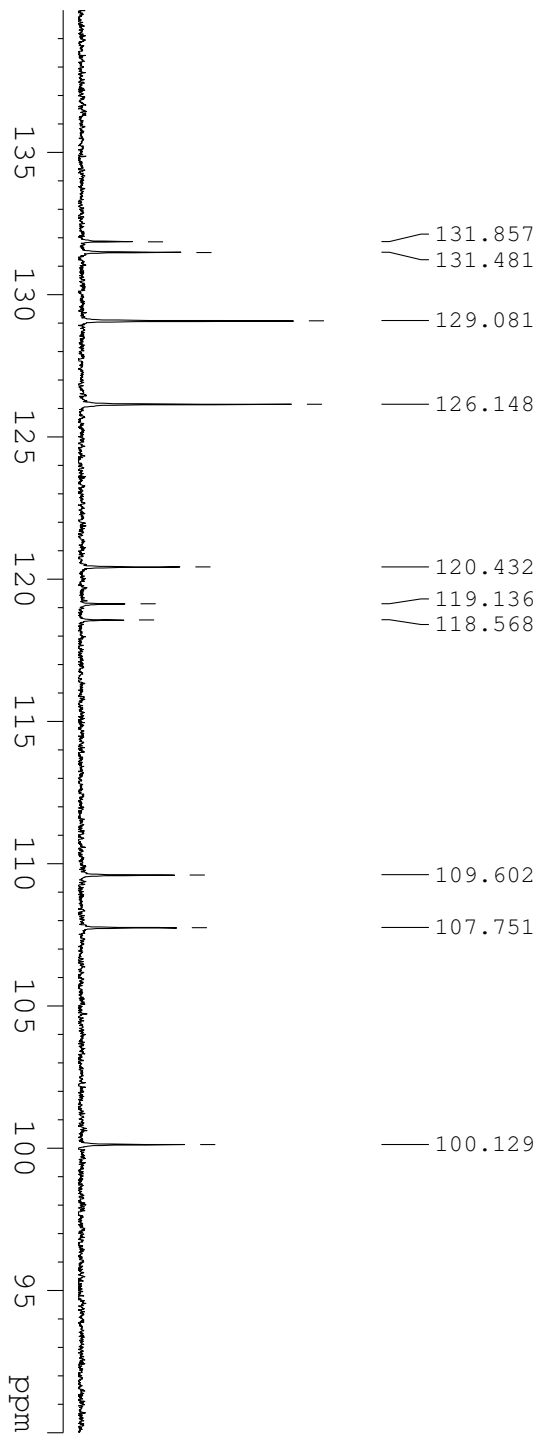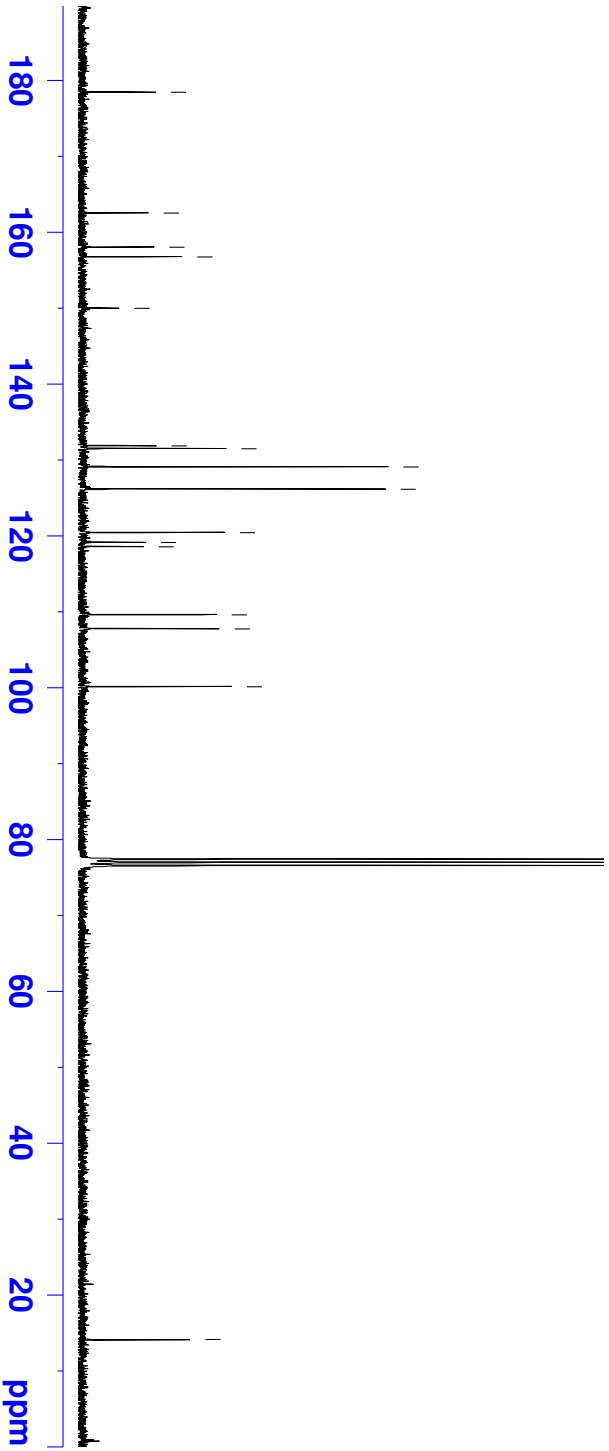

==== CHANNEL F1 =====  
 SFO1 75.4878687 MHz  
 NUC1 13C  
 P1 16.00 usec  
 PLW1 60.00000000 W

==== CHANNEL F2 =====  
 SFO2 300.1812007 MHz  
 NUC2 1H  
 CPDPRG12 waltz16  
 PCPD2 105.00 usec  
 PLW2 25.00000000 W  
 PLW12 0.21336000 W  
 PLW13 0.23522000 W

F2 - Processing parameters  
 SI 32768  
 SF 75.4803210 MHz  
 WDW EM  
 SSB 0  
 LB 1.00 Hz  
 GB 0  
 PC 1.40

5B7PF (Compound 6)

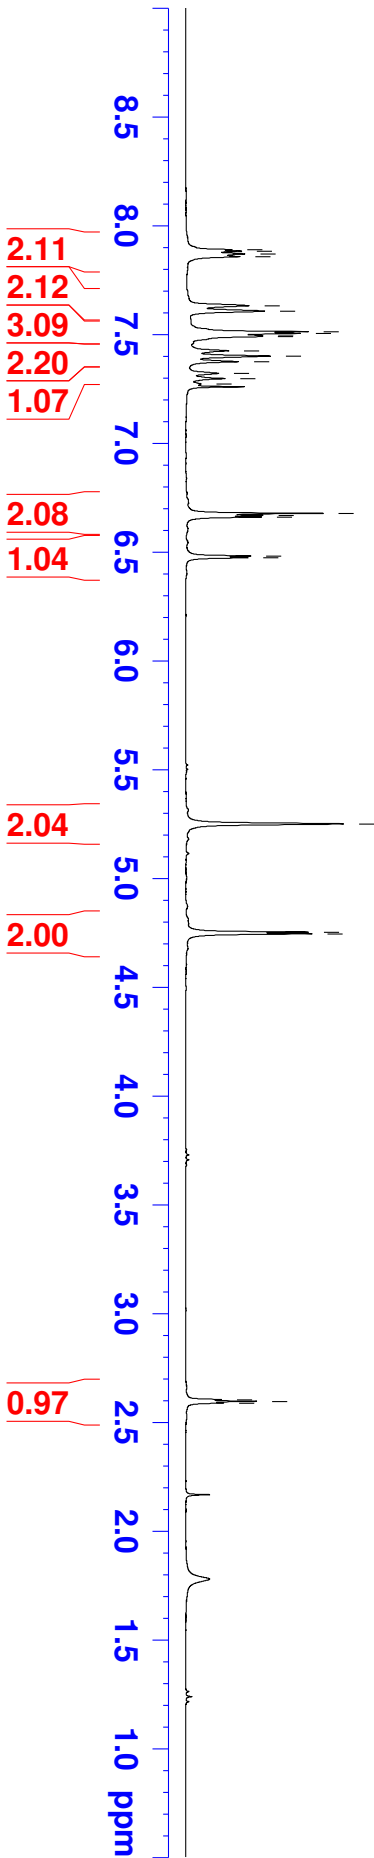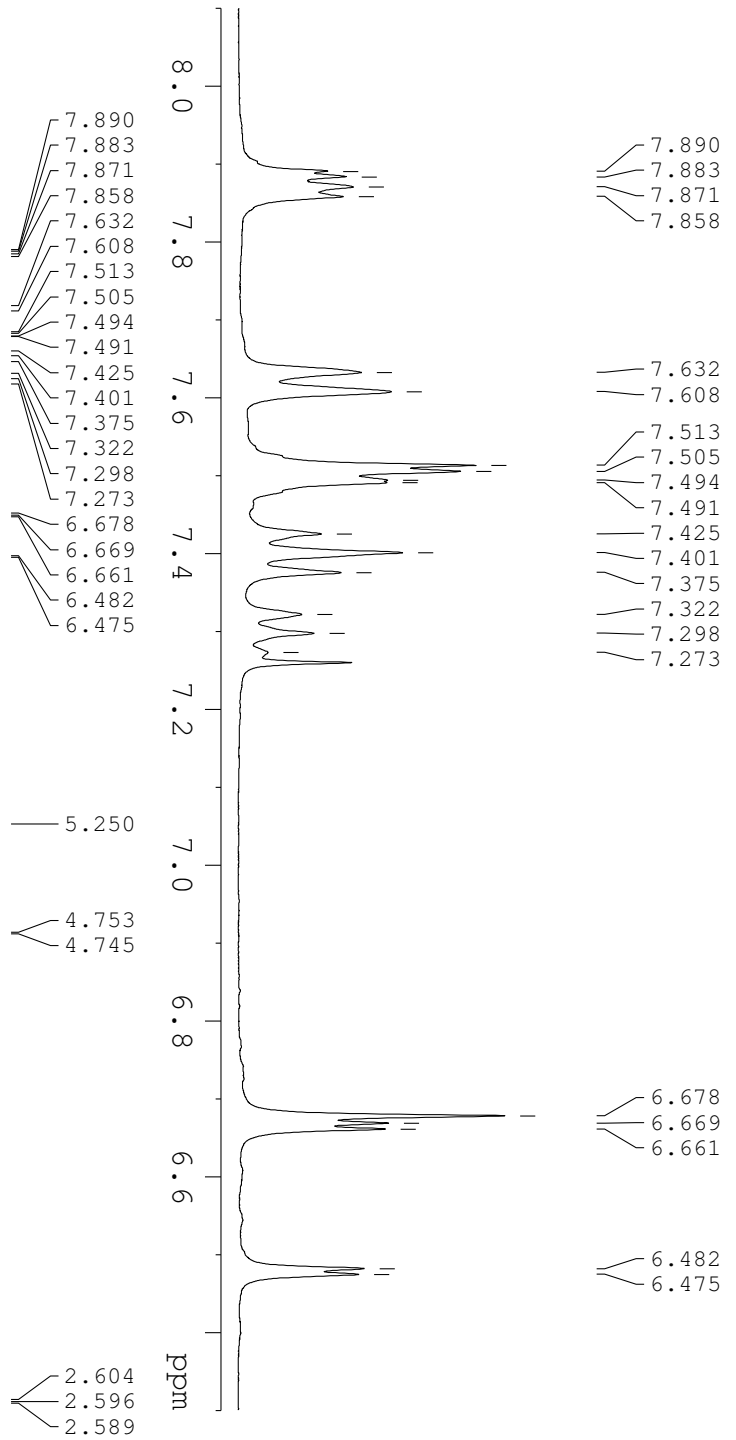

Current Data Parameters  
 NAME 5B7PF  
 EXPNO 1  
 PROCNO 1  
 F2 - Acquisition Parameters  
 Date\_ 20130426  
 Time 14.06  
 INSTRUM FOURIER300  
 PROBD 5 mm DUL 13C-1  
 PULPROG zg30  
 TD 65536  
 SOLVENT CDCl3  
 NS 16  
 DS 2  
 SWH 6103.516 Hz  
 FIDRES 0.093132 Hz  
 AQ 5.3687091 sec  
 RG 44.5217  
 DW 81.920 usec  
 DE 6.50 usec  
 TE 296.7 K  
 D1 1.00000000 sec  
 TDO 1  
 ===== CHANNEL f1 =====  
 SFOL 300.1818537 MHz  
 NUCL1 1H  
 P1 8.75 usec  
 PLWL 25.00000000 W  
 F2 - Processing parameters  
 SI 65536  
 SF 300.1800050 MHz  
 WDW EM  
 SSB 0  
 LB 0.30 Hz  
 GB 0  
 PC 1.00

5B7PF

5B7PF (Compound 6)

5B7PF

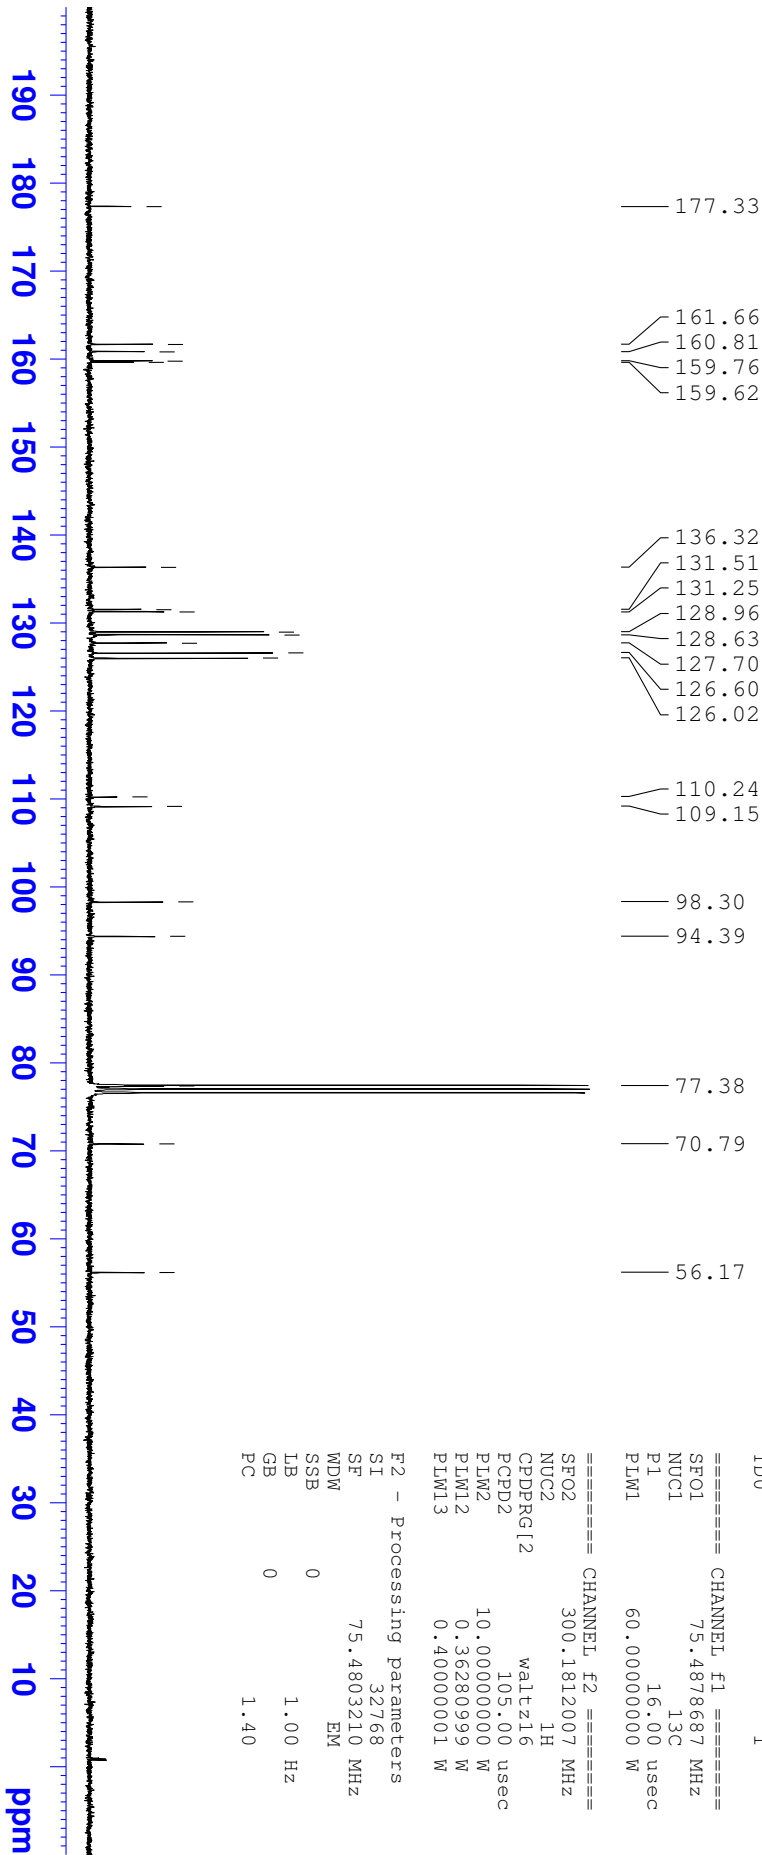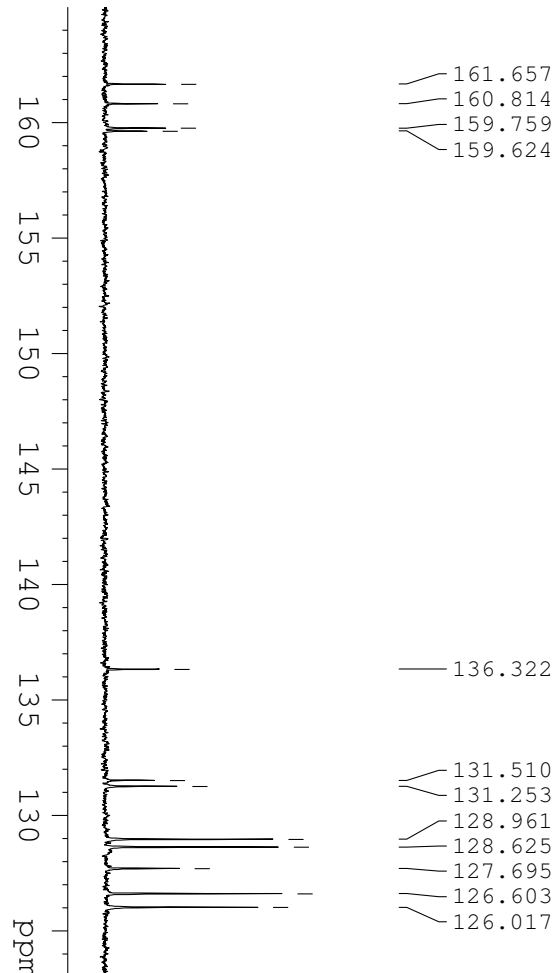

Current Data Parameters  
 NAME 5B7PF  
 EXPNO 2  
 PROCNO 1

F2 - Acquisition Parameters  
 Date\_ 20130426  
 Time 14.24  
 INSTRUM FOURIER300  
 PROBD 5 mm DUL 13C-1  
 PULPROG zgpg30  
 TD 65536  
 SOLVENT CDC13  
 NS 2000  
 DS 4  
 SWH 24414.063 Hz  
 FIDRES 0.372529 Hz  
 AQ 1.3421773 sec  
 RG 501.187  
 DW 20.480 usec  
 DE 6.50 usec  
 TE 296.9 K  
 D1 2.00000000 sec  
 D11 0.03000000 sec  
 D31 0.00001600 sec  
 D40 0.02432300 sec  
 L4 34  
 L5 49  
 P32 105.00 usec  
 TD0 1

==== CHANNEL F1 =====  
 SFO1 75.4878687 MHz  
 NUC1 13C  
 P1 16.00 usec  
 PLW1 60.00000000 W

==== CHANNEL F2 =====  
 SFO2 300.1812007 MHz  
 NUC2 1H  
 CPDPRG12 waltz16  
 PCPD2 105.00 usec  
 PLW2 10.00000000 W  
 PLW12 0.36280999 W  
 PLW13 0.400000001 W

F2 - Processing parameters  
 SI 32768  
 SF 75.4803210 MHz  
 WDW EM  
 SSB 0  
 LB 1.00 Hz  
 GB 0  
 PC 1.40

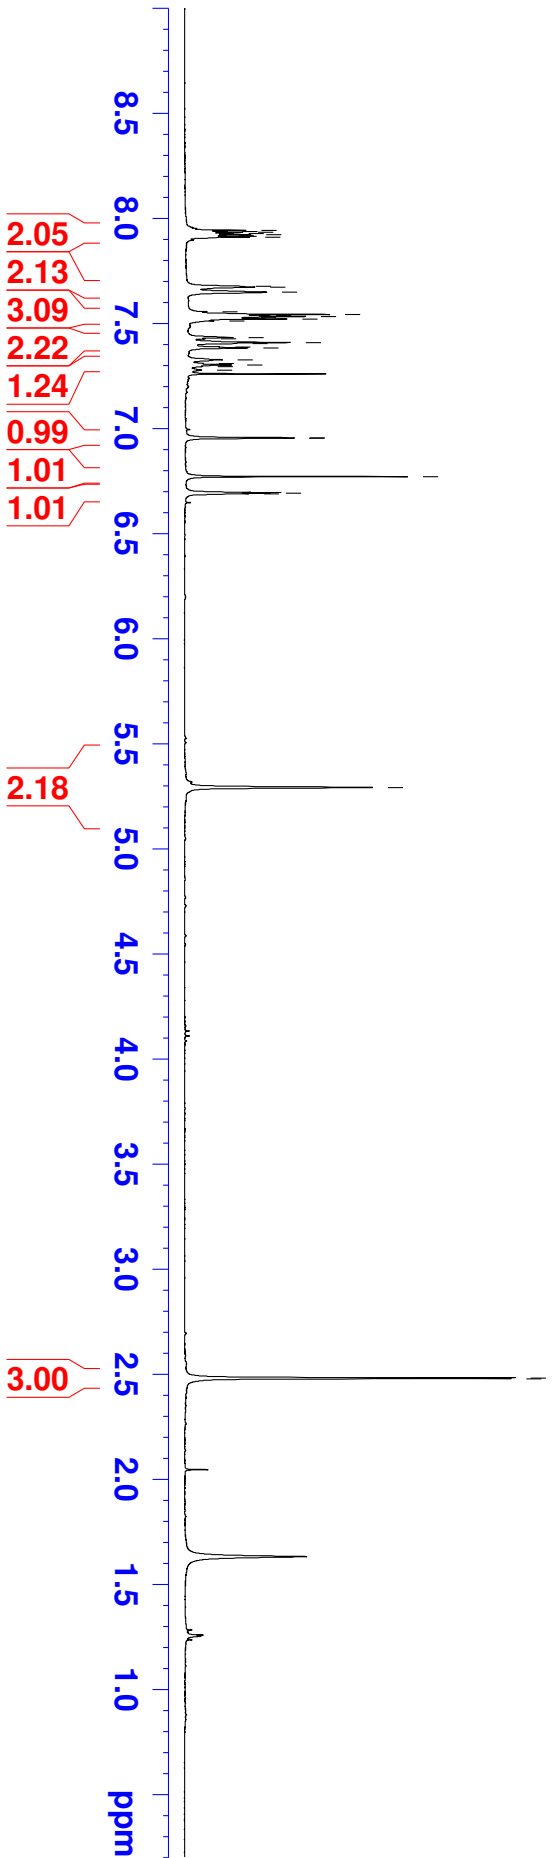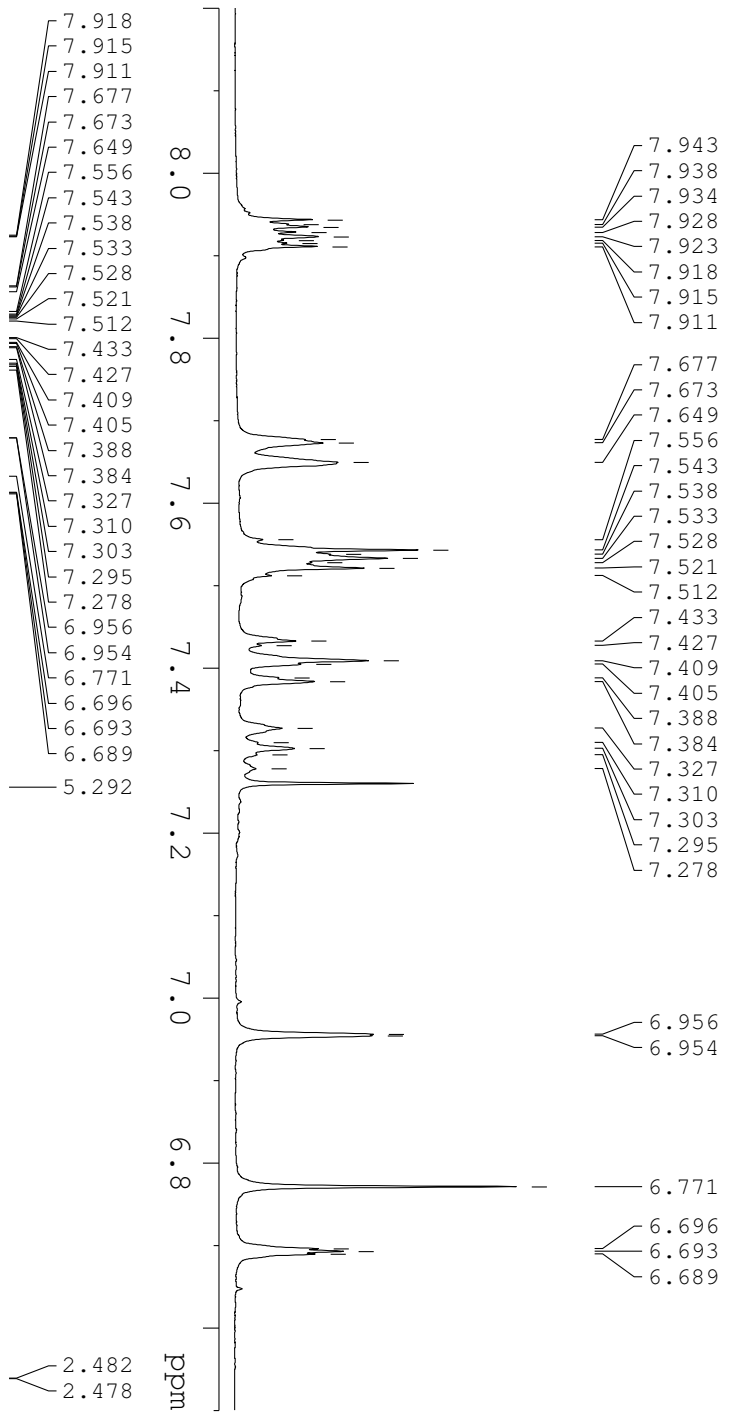

Current Data Parameters  
 NAME 5B78FF (II)  
 EXPNO 1  
 PROCNO 1

F2 - Acquisition Parameters  
 Date\_ 20130709  
 Time 14.42  
 INSTRUM FOURIER300  
 PROBD 5 mm DUL 13C-1  
 PULPROG zg30  
 TD 65536  
 SOLVENT CDCl3  
 NS 32  
 DS 2  
 SMH 6103.516 Hz  
 FIDRES 0.093132 Hz  
 AO 5.3687091 sec  
 RG 85.7801  
 DW 81.920 usec  
 DE 6.50 usec  
 TE 297.8 K  
 D1 1.00000000 sec  
 TD0 1

==== CHANNEL f1 =====  
 SFO1 300.1818537 MHz  
 NUCL1 1H  
 P1 8.75 usec  
 PLWL 25.00000000 W

F2 - Processing parameters  
 SI 65536  
 SF 300.1800050 MHz  
 WDW EM  
 SSB 0  
 LB 0.30 Hz  
 GB 0  
 PC 1.00

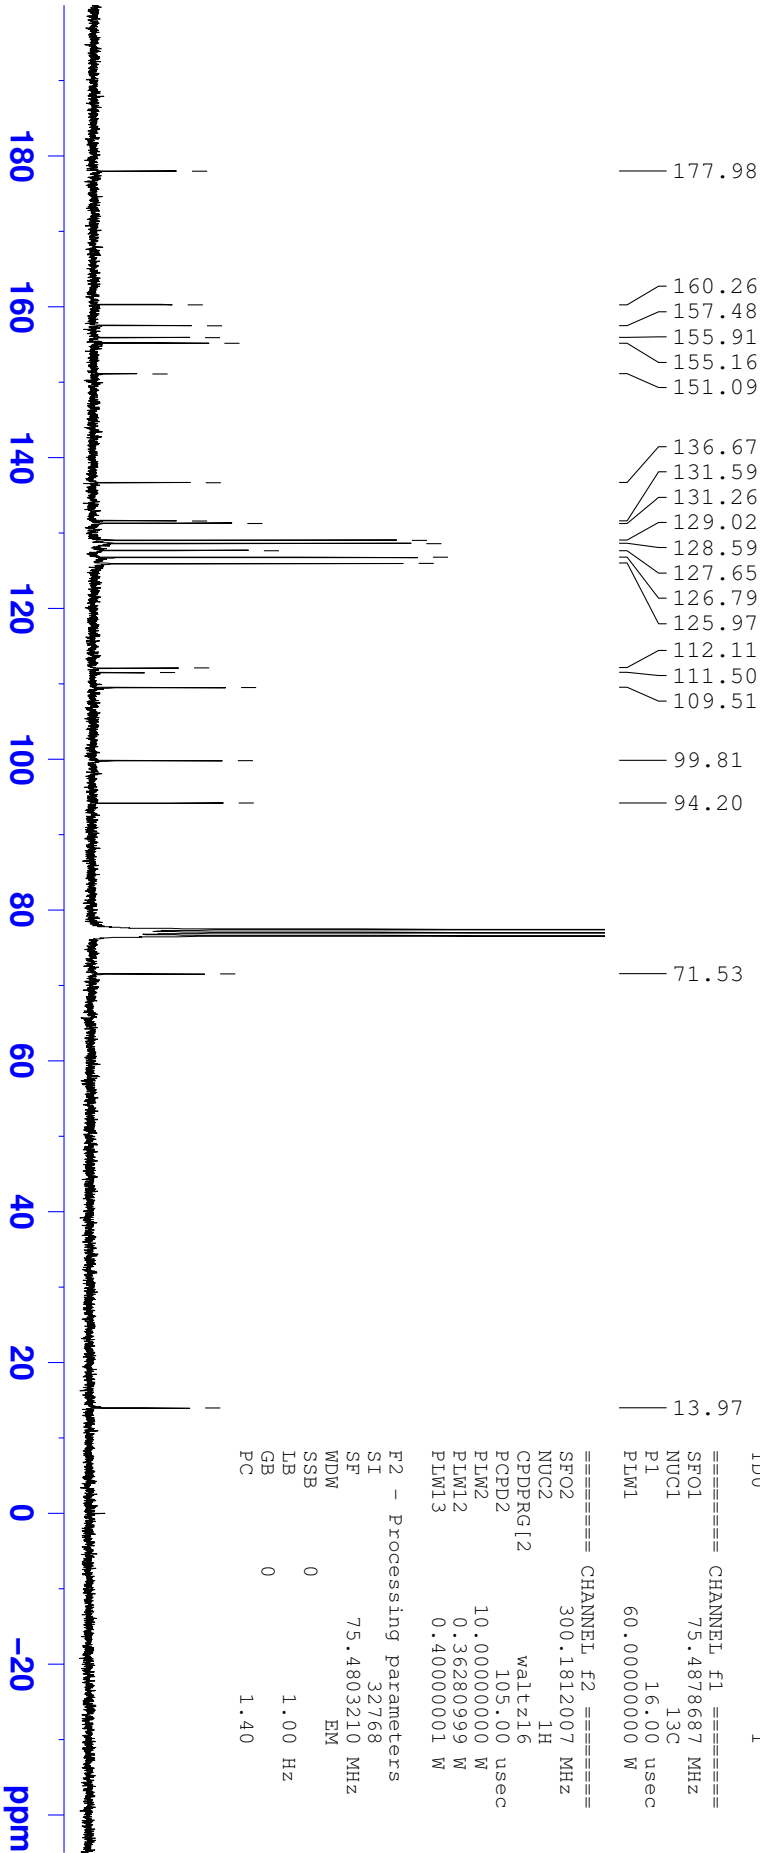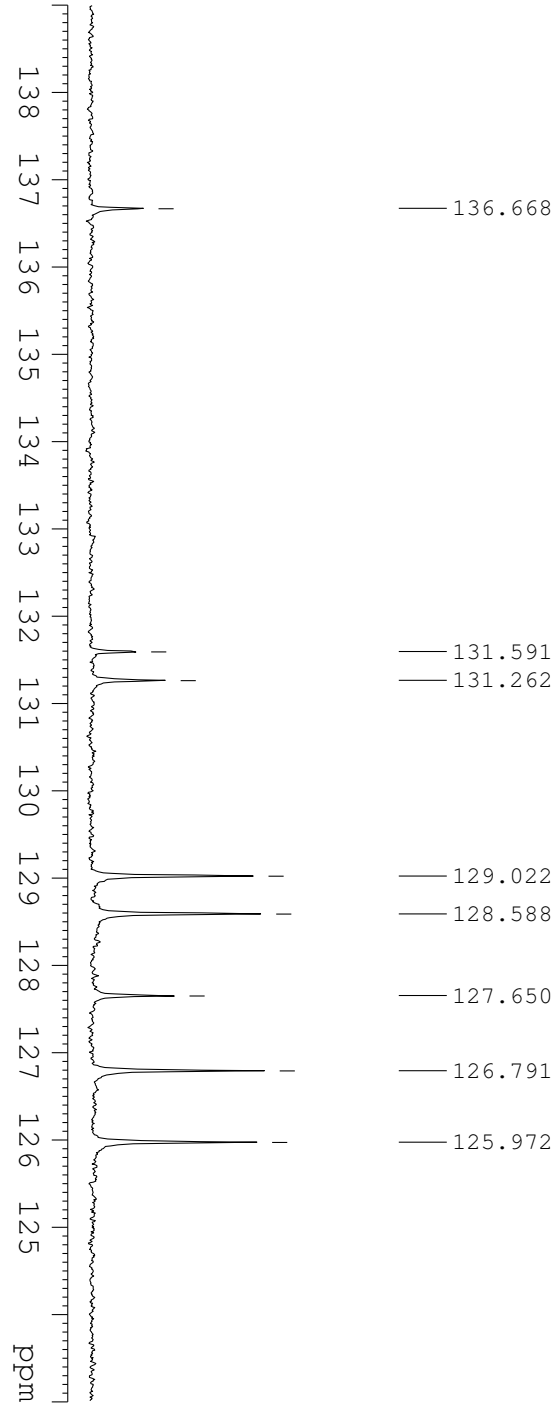

Current Data Parameters  
 NAME 5B78FF (II)  
 EXPNO 2  
 PROCNO 1

F2 - Acquisition Parameters  
 Date\_ 20130710  
 Time 18.29  
 INSTRUM FOURIER300  
 PROBD 5 mm DUL 13C-1  
 PULPROG zgpg30  
 TD 65536  
 SOLVENT CDC13  
 NS 15000  
 DS 4  
 SWH 24414.063 Hz  
 FIDRES 0.372529 Hz  
 AQ 1.3421773 sec  
 RG 501.187  
 DW 20.480 usec  
 DE 6.50 usec  
 TE 298.4 K  
 D1 2.00000000 sec  
 D11 0.03000000 sec  
 D31 0.00001600 sec  
 D40 0.02432300 sec  
 L4 34  
 L5 49  
 P32 105.00 usec  
 TD0 1

==== CHANNEL F1 =====  
 SF01 75.4878687 MHz  
 NUC1 13C  
 P1 16.00 usec  
 PLW1 60.00000000 W

==== CHANNEL F2 =====  
 SF02 300.1812007 MHz  
 NUC2 1H  
 CPDPRG12 waltz16  
 PCPD2 105.00 usec  
 PLW2 10.00000000 W  
 PLW12 0.36280999 W  
 PLW13 0.400000001 W

F2 - Processing parameters  
 SI 32768  
 SF 75.4803210 MHz  
 WDW EM  
 SSB 0  
 LB 1.00 Hz  
 GB 0  
 PC 1.40

7.938  
7.933  
7.926  
7.923  
7.920  
7.914  
7.906

7.583  
7.577  
7.565  
7.561  
7.553  
7.540  
7.529  
7.524

6.861  
6.858

6.762  
6.634  
6.631  
6.628

12.637  
7.938  
7.933  
7.926  
7.923  
7.920  
7.914  
7.906  
7.583  
7.577  
7.565  
7.561  
7.553  
7.540  
7.529  
7.524  
6.861  
6.858  
6.762  
6.634  
6.631  
6.628  
2.473  
2.469

ppm

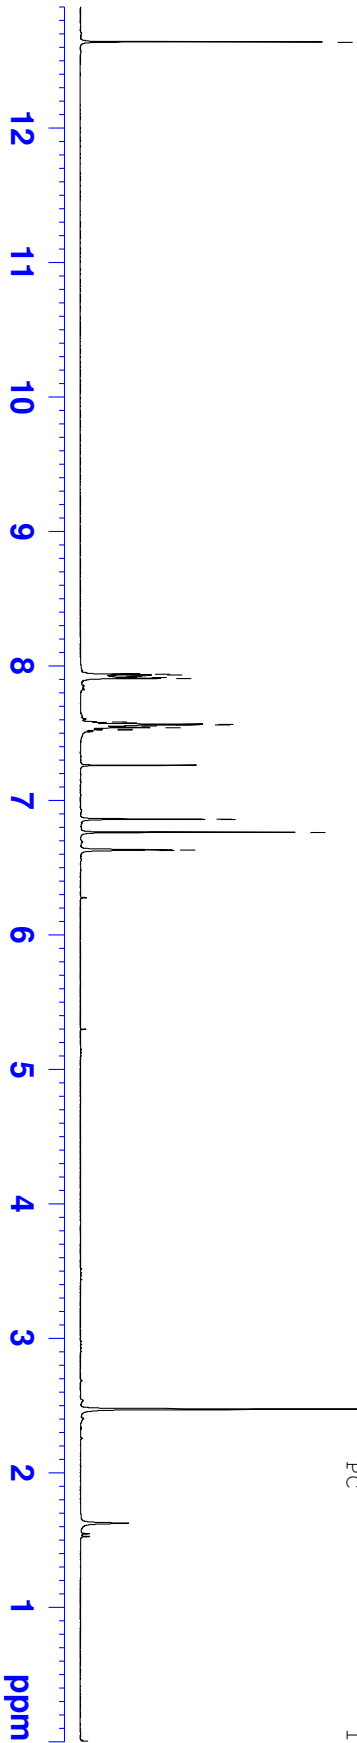

Current Data Parameters  
NAME 5H78FF  
EXPNO 1  
PROCNO 1

F2 - Acquisition Parameters

Date\_ 20130916  
Time 17.18  
INSTRUM FOURIER300  
PROBHD 5 mm DUL 13C-1  
PULPROG zg30  
TD 65536  
SOLVENT CDCl3  
NS 16  
DS 2  
SWH 6103.516 Hz  
FIDRES 0.093132 Hz  
AQ 5.3687091 sec  
RG 92.391  
DW 81.920 usec  
DE 6.50 usec  
TE 296.3 K  
D1 1.00000000 sec  
TD0 1

==== CHANNEL f1 =====  
SF01 300.1818537 MHz  
NUC1 1H  
P1 8.75 usec  
PLW1 25.00000000 W

F2 - Processing parameters  
SI 65536  
SF 300.1800050 MHz  
WDW EM  
SSB 0  
LB 0.30 Hz  
GB 0  
PC 1.00



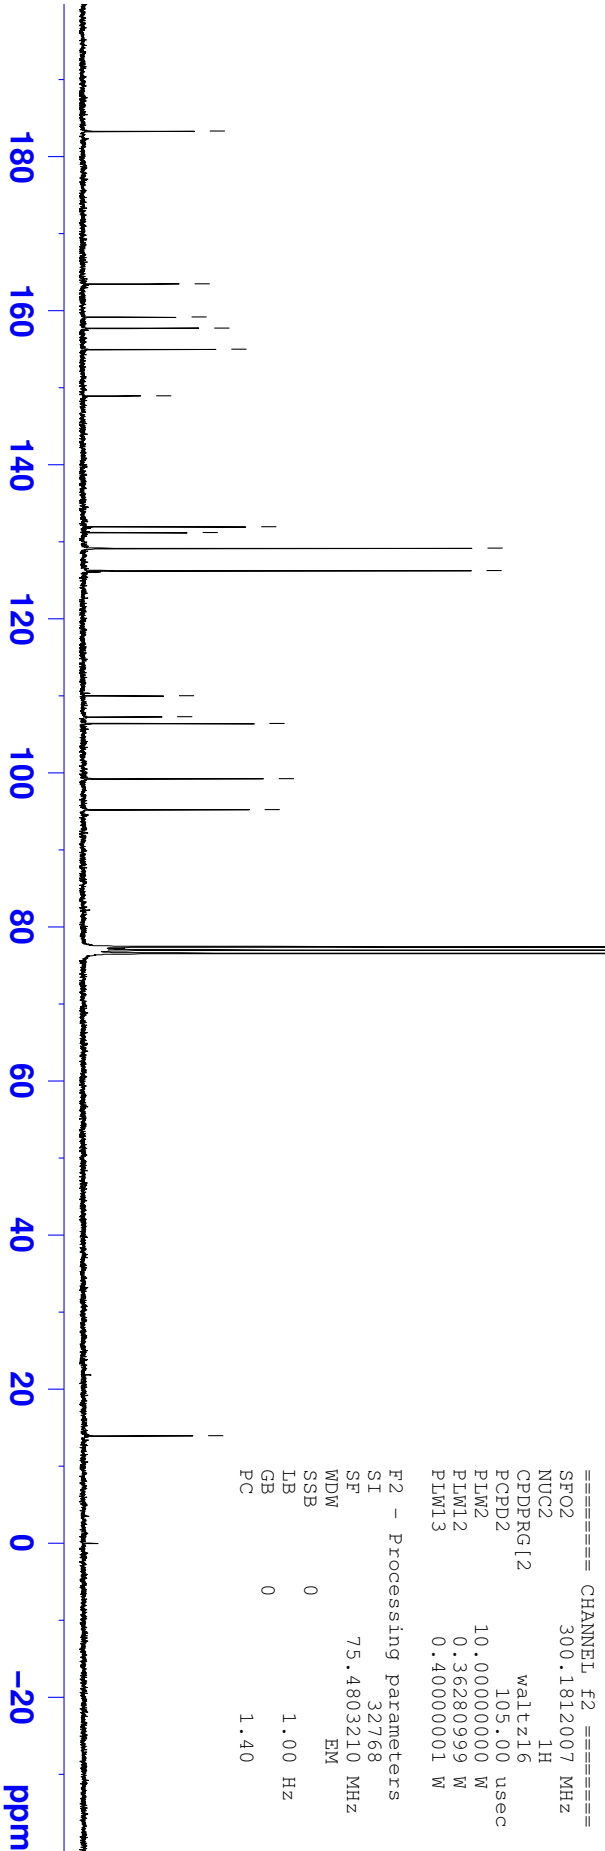

- 183.32
- 163.49
- 159.19
- 157.74
- 155.00
- 148.95
- 131.96
- 131.20
- 129.18
- 126.27
- 110.02
- 107.30
- 106.42
- 99.25
- 95.23

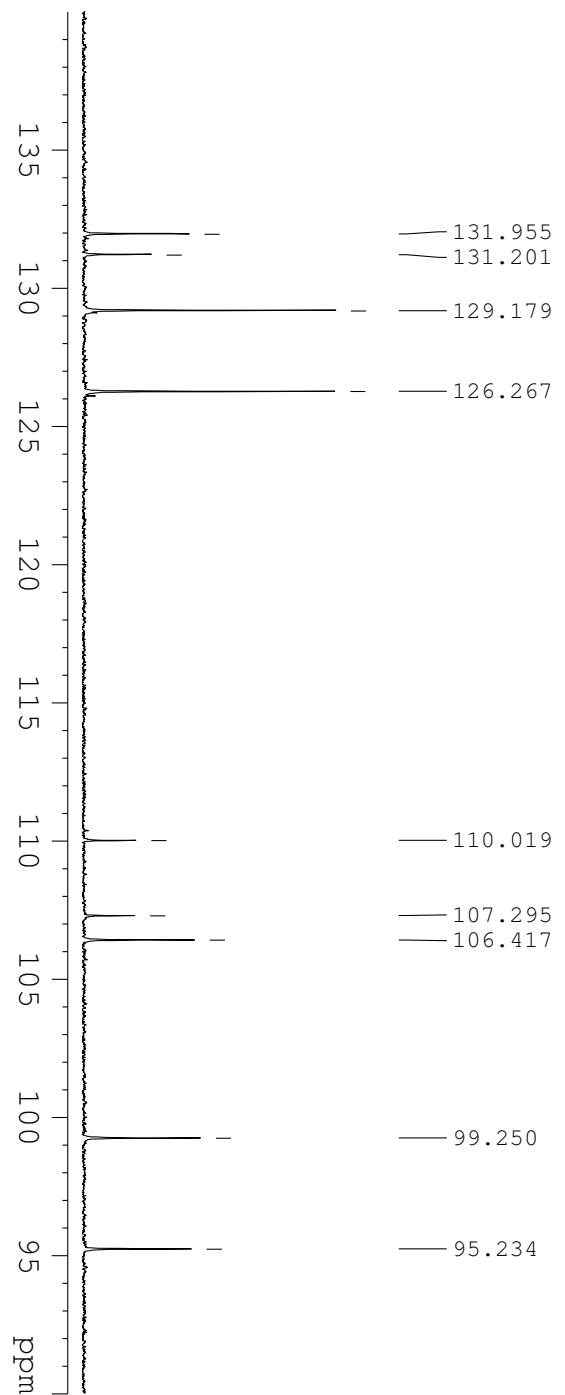

- 131.955
- 131.201
- 129.179
- 126.267
- 110.019
- 107.295
- 106.417
- 99.250
- 95.234

Current Data Parameters  
 NAME 5H78FF  
 EXPNO 2  
 PROCNO 1

F2 - Acquisition Parameters

Date\_ 20130916  
 Time 17.26  
 INSTRUM FOURIER300  
 PROBD 5 mm DUL 13C-1  
 PULPROG zgpg30  
 TD 65536  
 SOLVENT CDC13  
 NS 12000  
 DS 4  
 SWH 24414.063 Hz  
 FIDRES 0.372529 Hz  
 AQ 1.3421773 sec  
 RG 501.187  
 DW 20.480 usec  
 DE 6.50 usec  
 TE 296.5 K  
 D1 2.00000000 sec  
 D11 0.03000000 sec  
 D31 0.00001600 sec  
 D40 0.02432300 sec  
 L4 34  
 L5 49  
 P32 105.00 usec  
 TD0 1

==== CHANNEL F1 =====  
 SFO1 75.4878687 MHz  
 NUC1 13C  
 P1 16.00 usec  
 PLW1 60.00000000 W

==== CHANNEL F2 =====  
 SFO2 300.1812007 MHz  
 NUC2 1H  
 CPDPRG12 waltz16  
 PCPD2 105.00 usec  
 PLW2 10.00000000 W  
 PLW12 0.36280999 W  
 PLW13 0.40000001 W

F2 - Processing parameters  
 SI 32768  
 SF 75.4803210 MHz  
 WDW EM  
 SSB 0  
 LB 1.00 Hz  
 GB 0  
 PC 1.40

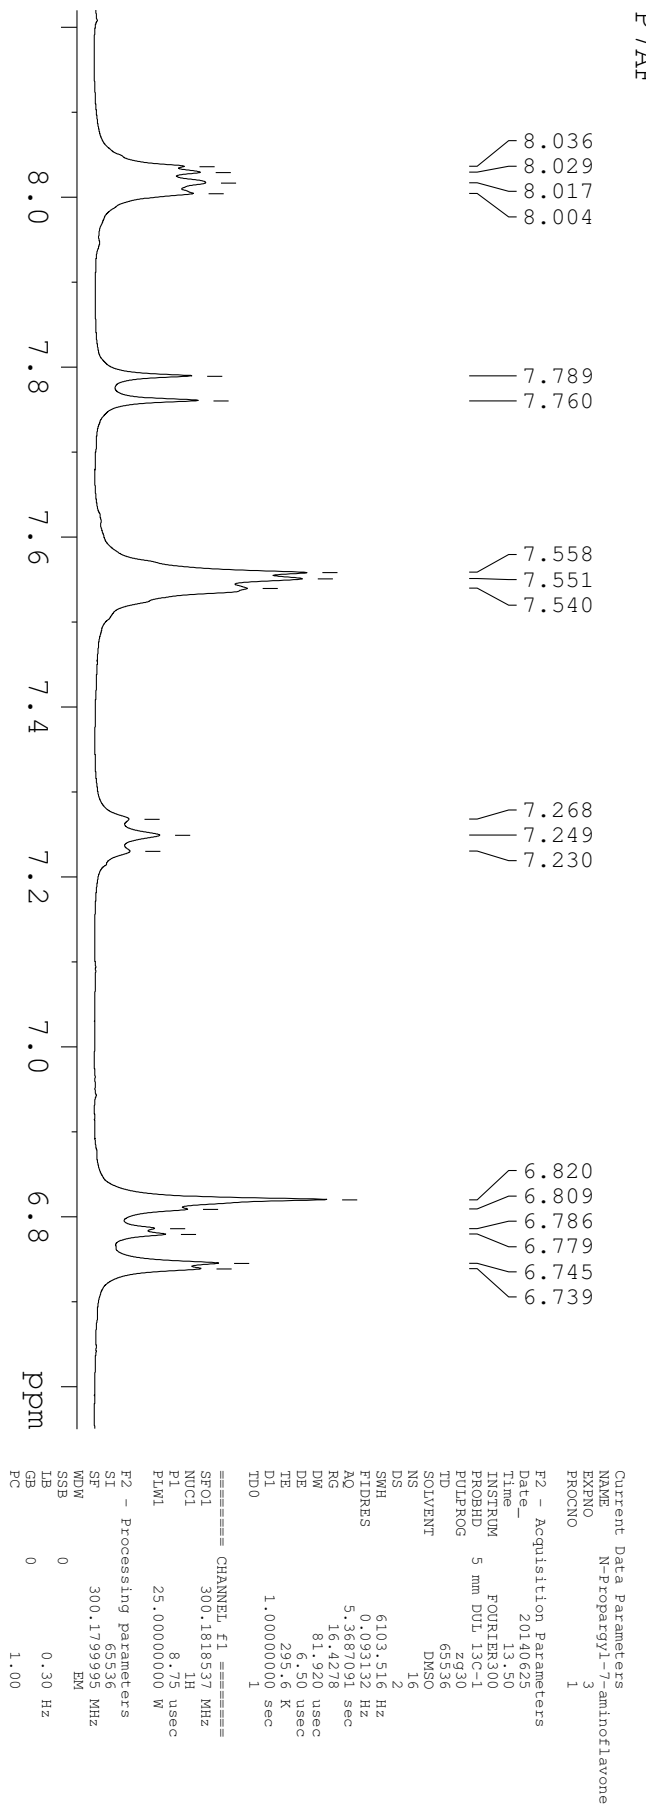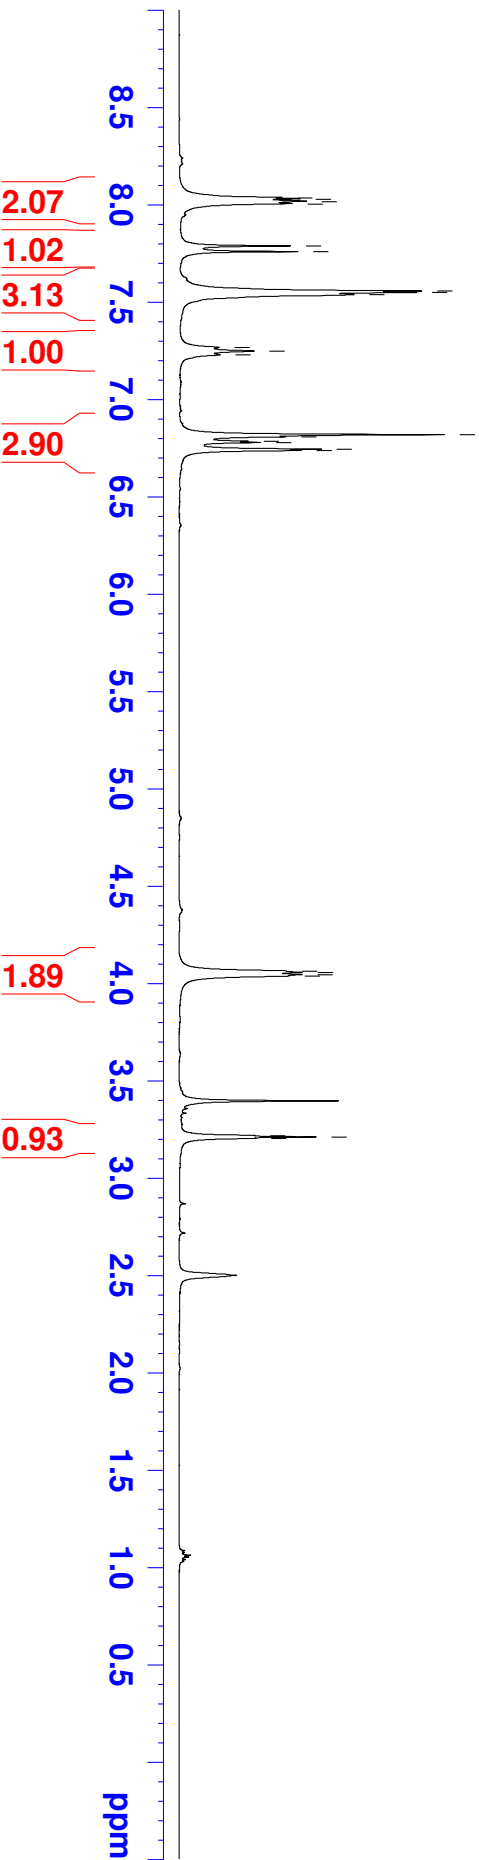

Current Data Parameters  
 NAME N-Propargyl-7-aminoflav  
 EXPNO 2  
 PROCNO 1

F2 - Acquisition Parameters

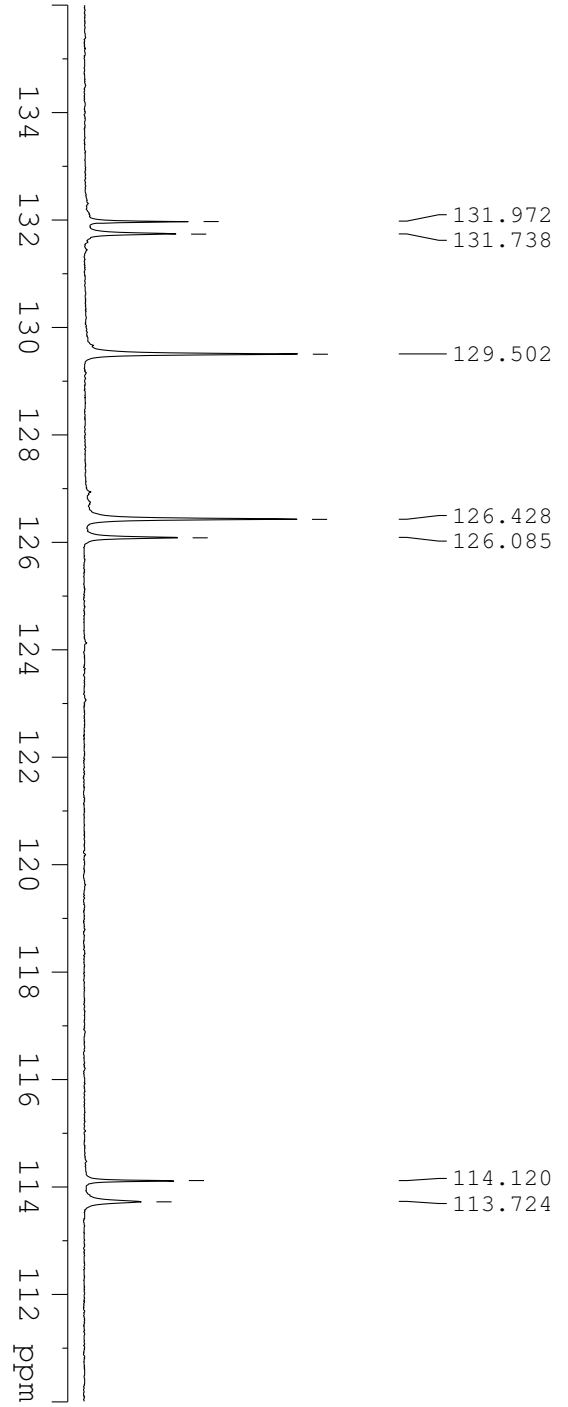

==== CHANNEL F1 =====  
 SFO1 75.4878687 MHz  
 NUC1 13C  
 P1 16.00 usec  
 PLW1 60.00000000 W

==== CHANNEL F2 =====  
 SFO2 300.1812007 MHz  
 NUC2 1H  
 CPDPRG12 waltz16  
 PCPD2 105.00 usec  
 PLW2 10.00000000 W  
 PLW12 0.36280999 W  
 PLW13 0.40000001 W

F2 - Processing parameters

SI 32768  
 SF 75.4803210 MHz  
 WDW EM  
 SSB 0  
 LB 1.00 Hz  
 GB 0  
 PC 1.40

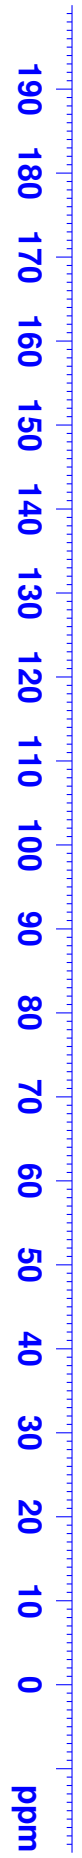

DP7AF (Compound 10)

DP7AF

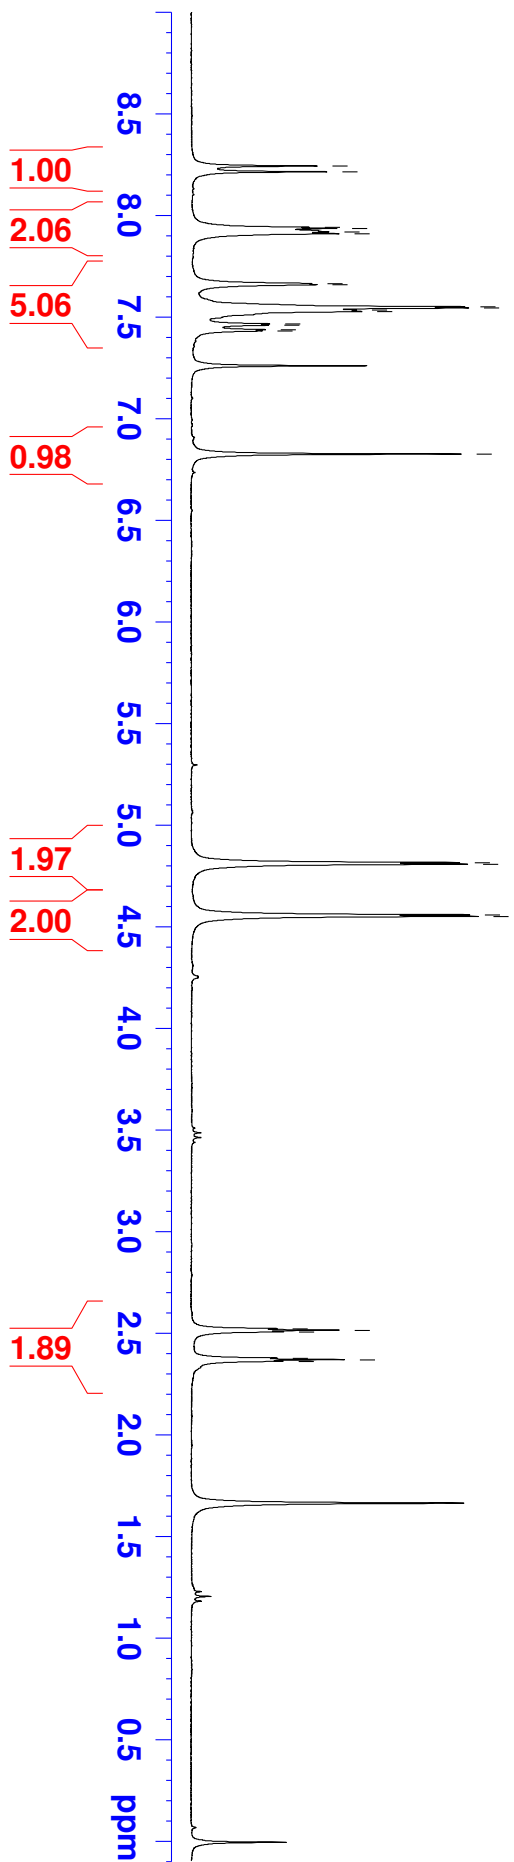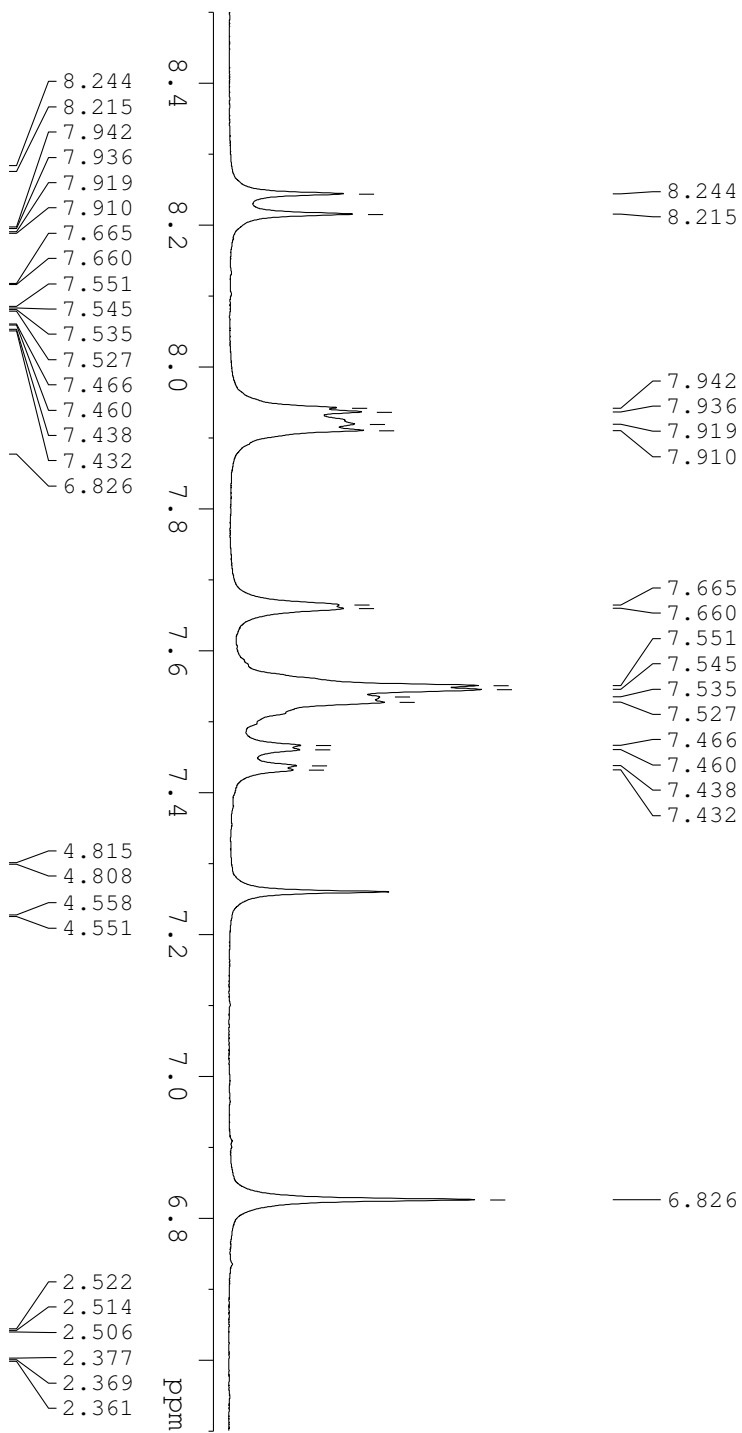

Current Data Parameters  
 NAME N,N-Dipropargyl-7-aminoflavone  
 EXPNO 3  
 PROCNO 1

F2 - Acquisition Parameters  
 Date\_ 20140624  
 Time 17.24  
 INSTRUM PULPROG  
 PROBHD 5 mm DUL 13C-1  
 PULPROG zg30  
 TD 65536  
 SOLVENT CDCl3  
 NS 32  
 DS 2  
 SWH 6103.516 Hz  
 FIDRES 0.093132 Hz  
 AQ 5.3687091 sec  
 RG 75.8519  
 DW 81.920 usec  
 DE 6.50 usec  
 TE 295.3 K  
 D1 1.00000000 sec  
 IDU 1

==== CHANNEL f1 =====  
 SF01 300.1818537 MHz  
 NUC1 13C  
 P1 8.15 usec  
 F1 25.00000000 W  
 FWHM 25.00000000 W

F2 - Processing parameters  
 SI 65536  
 SF 300.1800049 MHz  
 MWDW EM  
 SSB 0  
 LB 0  
 GB 0  
 PC 1.00

Current Data Parameters  
 NAME N,N-Dipropargyl-7-aminic  
 EXPNO 2  
 PROCNO 1

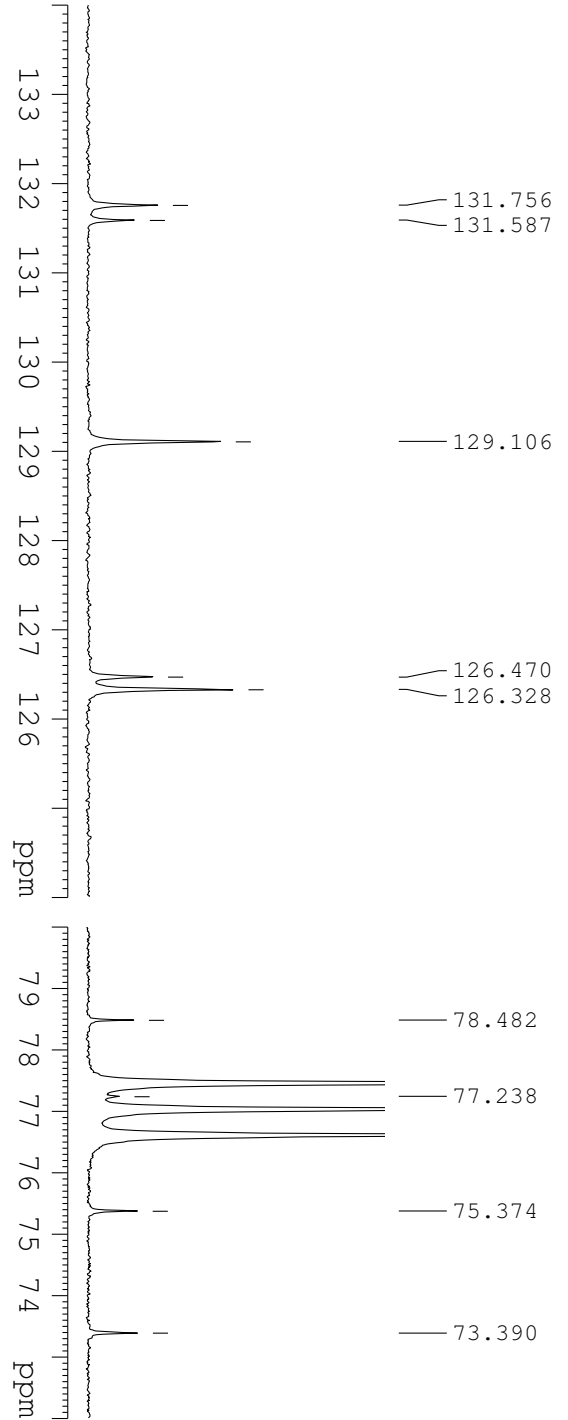

F2 - Acquisition Parameters  
 Date\_ 20140624  
 Time 17.31  
 INSTRUM FOURIER300  
 PROBHID 5 mm DUL 13C-1  
 PULPROG zgpg30  
 TD 65536  
 SOLVENT CDC13  
 NS 15000  
 DS 4  
 SWH 24414.063 Hz  
 FIDRES 0.372529 Hz  
 AQ 1.3421773 sec  
 RG 501.187  
 DW 20.480 usec  
 DE 6.50 usec  
 TE 295.5 K  
 D1 2.00000000 sec  
 D11 0.03000000 sec  
 D31 0.00001600 sec  
 D40 0.02432300 sec  
 L4 34  
 L5 49  
 P32 105.00 usec  
 TD0 1

177.73  
 163.73  
 156.36  
 153.52  
 145.78  
 131.76  
 131.59  
 129.11  
 126.47  
 126.33  
 122.20  
 114.97  
 107.78  
 78.48  
 77.24  
 75.37  
 73.39  
 54.02  
 39.99

==== CHANNEL F1 =====  
 SF01 75.4878687 MHz  
 NUC1 13C  
 P1 16.00 usec  
 PLW1 60.00000000 W

==== CHANNEL F2 =====  
 SF02 300.1812007 MHz  
 NUC2 1H  
 CPDPRG12 waltz16  
 PCPD2 105.00 usec  
 PLW2 10.00000000 W  
 PLW12 0.36280999 W  
 PLW13 0.40000001 W

F2 - Processing parameters  
 SI 32768  
 SF 75.4803210 MHz  
 WDW EM  
 SSB 0  
 LB 1.00 Hz  
 GB 0  
 PC 1.40

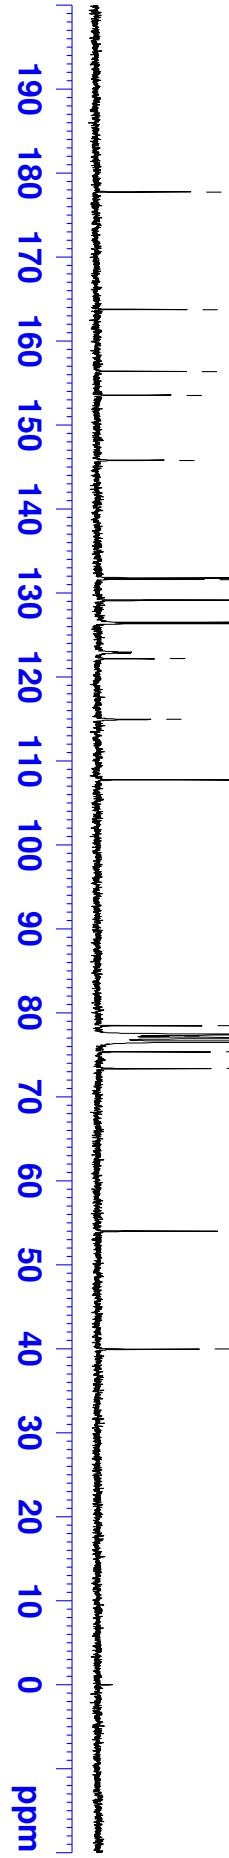

78PyF

Current Data Parameters  
 NAME 78Pyridinoflavone  
 EXPNO 1  
 PROCNO 1

F2 - Acquisition Parameters  
 Date\_ 20140627  
 Time 9.46  
 INSTRUM FOURIER300  
 PROBD 5 mm DUL 13C-1  
 PULPROG zg30  
 TD 65536  
 SOLVENT DMSO  
 NS 16  
 DS 2  
 SMH 6103.516 Hz  
 FIDRES 0.093132 Hz  
 AO 5.3687091 sec  
 RG 58.5143  
 DW 81.920 usec  
 DE 6.50 usec  
 TE 295.6 K  
 D1 1.00000000 sec  
 TD0 1

9.122  
9.117  
9.108  
9.103  
9.075  
9.047

8.251  
8.245  
8.228  
8.219  
8.213  
8.183

7.984  
7.954

7.806  
7.792  
7.778  
7.764  
7.633  
7.627  
7.618  
7.609

7.218

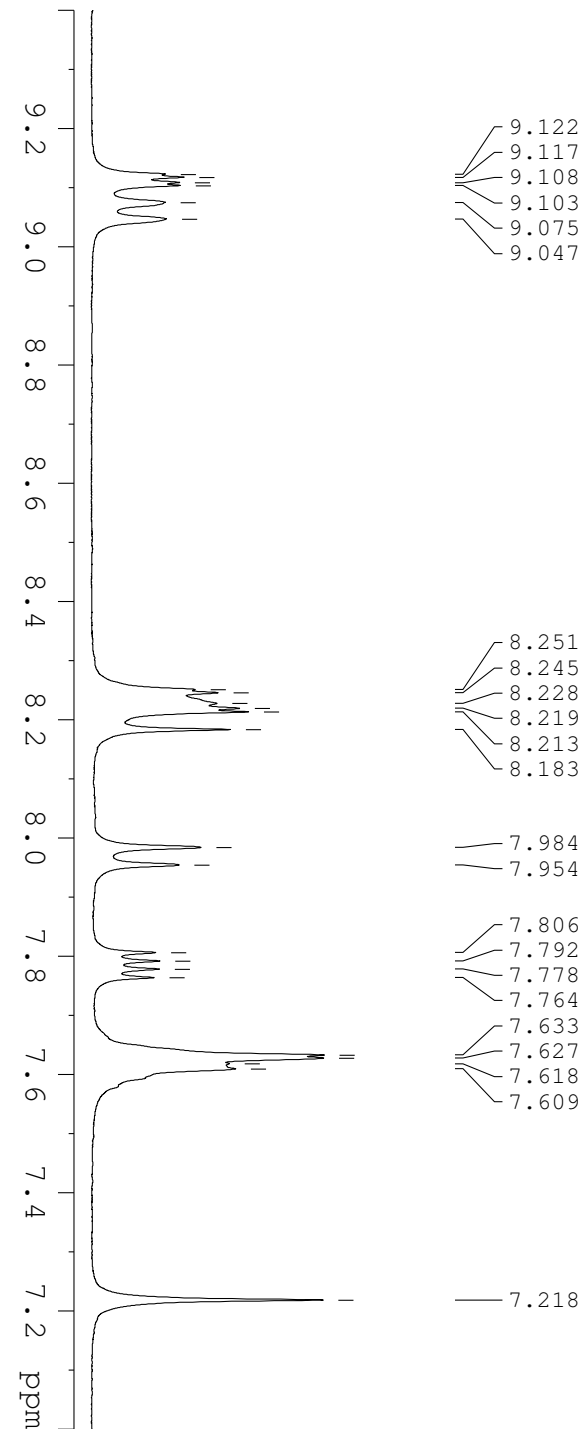

==== CHANNEL f1 =====  
 SFOL 300.1818537 MHz  
 NUC1 1H  
 P1 8.75 usec  
 PLWL 25.00000000 W

F2 - Processing parameters  
 SI 65536  
 SF 300.179997 MHz  
 MDW 0  
 SSB 0  
 LB 0.30 Hz  
 GB 0  
 PC 1.00

9.122  
9.117  
9.108  
9.103  
9.075  
9.047  
8.251  
8.245  
8.228  
8.219  
8.213  
8.183  
7.984  
7.954  
7.806  
7.792  
7.778  
7.764  
7.633  
7.627  
7.618  
7.609  
7.218

78PyF (Compound 11)

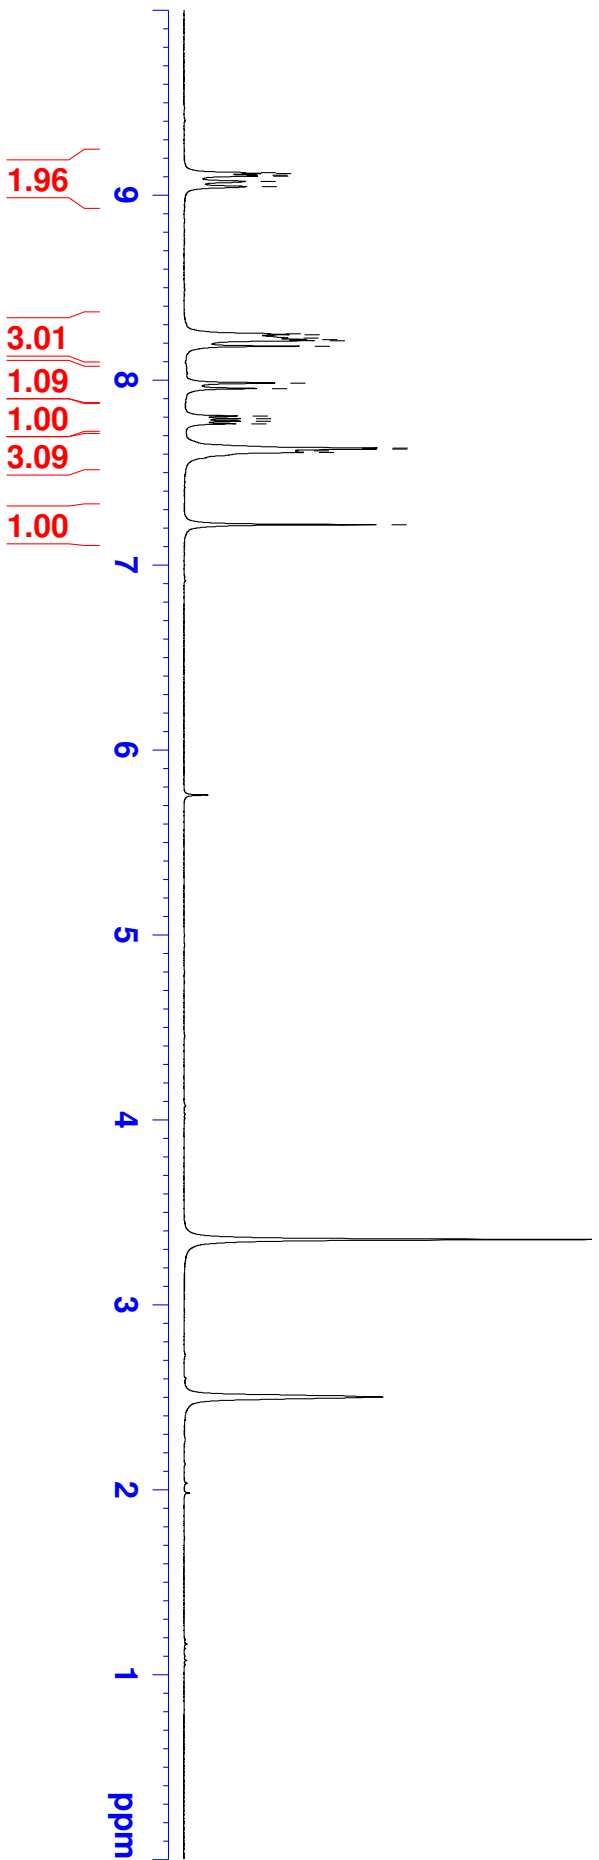

78PyF

Current Data Parameters  
 NAME 78Pyridinoflavone  
 EXPNO 2  
 PROCNO 1

F2 - Acquisition Parameters  
 Date\_ 20140627  
 Time 18.28

INSTRUM FOURIER300  
 PROBD 5 mm DUL 13C-1  
 PULPROG zgpg30  
 TD 65536  
 SOLVENT DMSO  
 NS 20000  
 DS 4

SWH 24414.063 Hz  
 FIDRES 0.372529 Hz  
 AQ 1.3421773 sec

RG 501.187  
 DW 20.480 usec  
 DE 6.50 usec  
 TE 295.7 K

D1 2.00000000 sec  
 D11 0.03000000 sec  
 D31 0.00001600 sec

D40 0.02432300 sec  
 L4 34  
 L5 49

P32 105.00 usec  
 TD0 1

==== CHANNEL F1 =====  
 SF01 75.4878687 MHz  
 NUC1 13C  
 P1 16.00 usec  
 PLW1 60.00000000 W

==== CHANNEL F2 =====  
 SF02 300.1812007 MHz  
 NUC2 1H  
 CPDPRG12 waltz16  
 PCPD2 105.00 usec  
 PLW2 10.00000000 W  
 PLW12 0.36280999 W  
 PLW13 0.400000001 W

F2 - Processing parameters  
 SI 32768  
 SF 75.4803210 MHz  
 WDW EM  
 SSB 0  
 LB 1.00 Hz  
 GB 0  
 PC 1.40

78PyF (Compound 11)

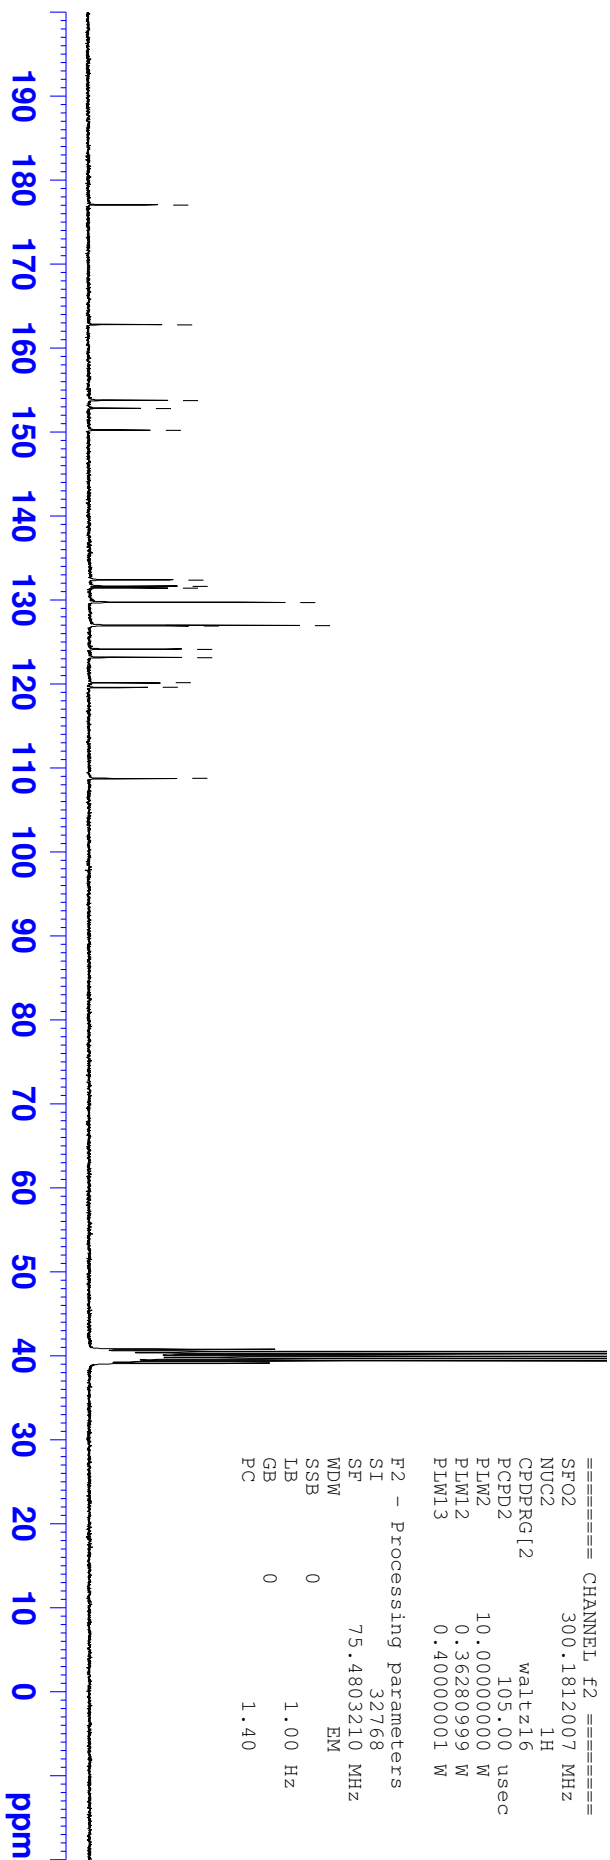

78DOF

Current Data Parameters  
 NAME 78DOF  
 EXPNO 1  
 PROCNO 1

F2 - Acquisition Parameters

Date\_ 20140602  
 Time\_ 10.11  
 INSTRUM FOURIER30  
 PROBHD 5 mm DUL 13C-1  
 PULPROG zgpg30  
 ID 65336  
 SOLVENT CDCl3  
 NS 16  
 DS 2  
 SWH 6103.516 Hz  
 FIDRES 0.093132 Hz  
 AQ 5.3687091 sec  
 RG 32  
 DW 81.920 usec  
 DE 6.50 usec  
 TE 296.1 K  
 D1 1.00000000 sec  
 TD0 1

==== CHANNEL f1 =====

SFO1 300.1818537 MHz  
 NUCL1 1H  
 P1 8.75 usec  
 PLW1 25.00000000 W

F2 - Processing parameters

SI 65536  
 SF 300.1800049 MHz  
 WDW EM  
 SSB 0  
 LB 0.30 Hz  
 GB 0  
 PC 1.00

7.909  
7.903  
7.895  
7.892  
7.888  
7.885  
7.876  
7.800  
7.771

7.531  
7.525  
7.523  
7.515  
7.509  
7.500  
7.496  
7.490  
7.479  
7.474

6.950  
6.922

7.903  
7.895  
7.892  
7.888  
7.885  
7.876  
7.800  
7.771  
7.531  
7.525  
7.523  
7.515  
7.509  
7.500  
7.496  
7.490  
7.479  
7.474  
6.950  
6.922  
6.719  
6.205

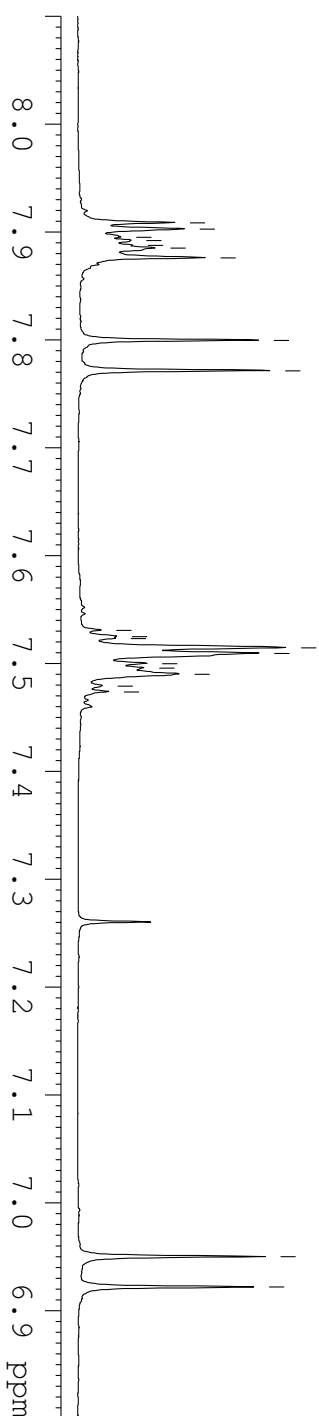

78DOF (Compound 12)

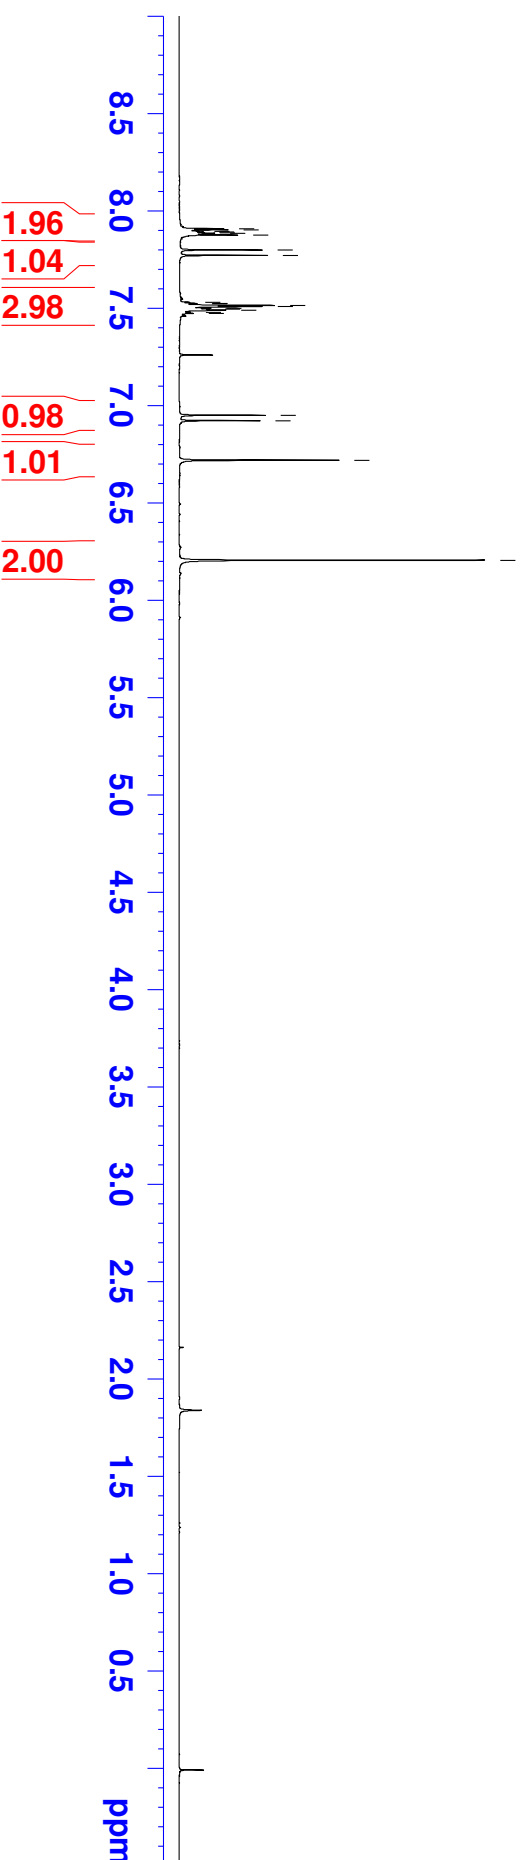



Current Data Parameters  
 NAME 78DOF  
 EXPNO 2  
 PROCNO 1

F2 - Acquisition Parameters

Date\_ 20140602  
 Time 10.17  
 INSTRUM FOURIER300  
 PROBHID 5 mm DUL 13C-1  
 PULPROG zgpg30  
 TD 65536  
 SOLVENT CDC13  
 NS 626  
 DS 4  
 SWH 24414.063 Hz  
 FIDRES 0.372529 Hz  
 AQ 1.3421773 sec  
 RG 501.187  
 DW 20.480 usec  
 DE 6.50 usec  
 TE 296.4 K  
 D1 2.00000000 sec  
 D11 0.03000000 sec  
 D31 0.00001600 sec  
 D40 0.02432300 sec  
 L4 34  
 L5 49  
 P32 105.00 usec  
 TD0 1

==== CHANNEL F1 =====

SFO1 75.4878687 MHz  
 NUC1 13C  
 P1 16.00 usec  
 PLW1 60.00000000 W

==== CHANNEL F2 =====

SFO2 300.1812007 MHz  
 NUC2 1H  
 CPDPRG12 waltz16  
 PCPD2 105.00 usec  
 PLW2 10.00000000 W  
 PLW12 0.36280999 W  
 PLW13 0.40000001 W

F2 - Processing parameters

SI 32768  
 SF 75.4803210 MHz  
 WDW EM  
 SSB 0  
 LB 1.00 Hz  
 GB 0  
 PC 1.40

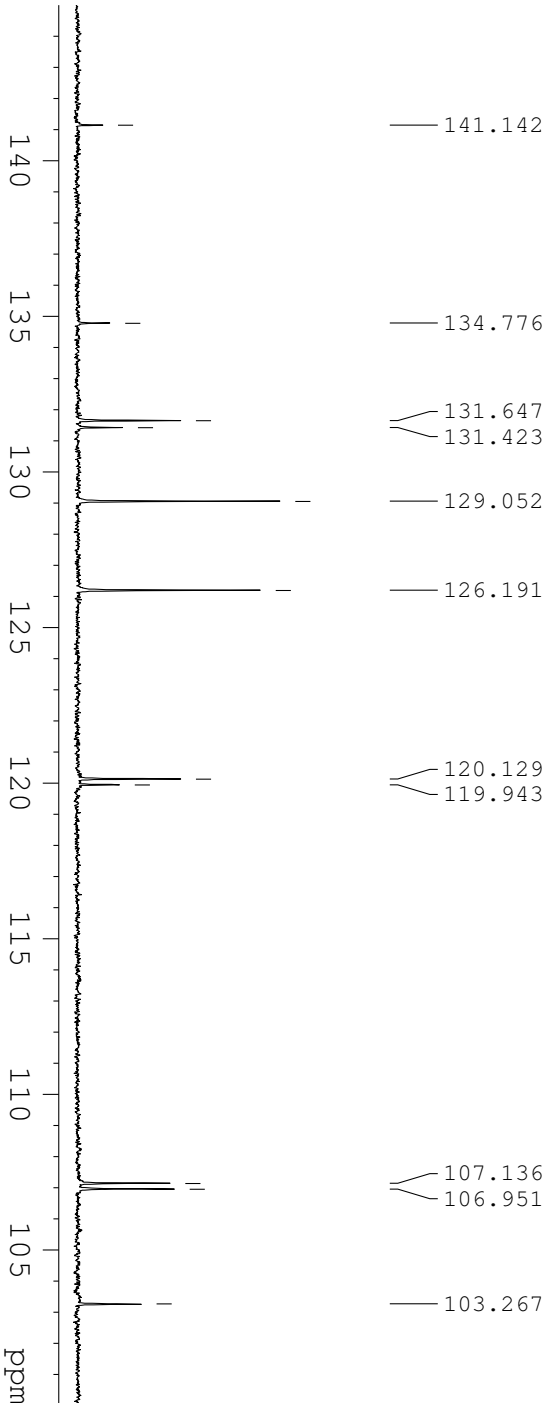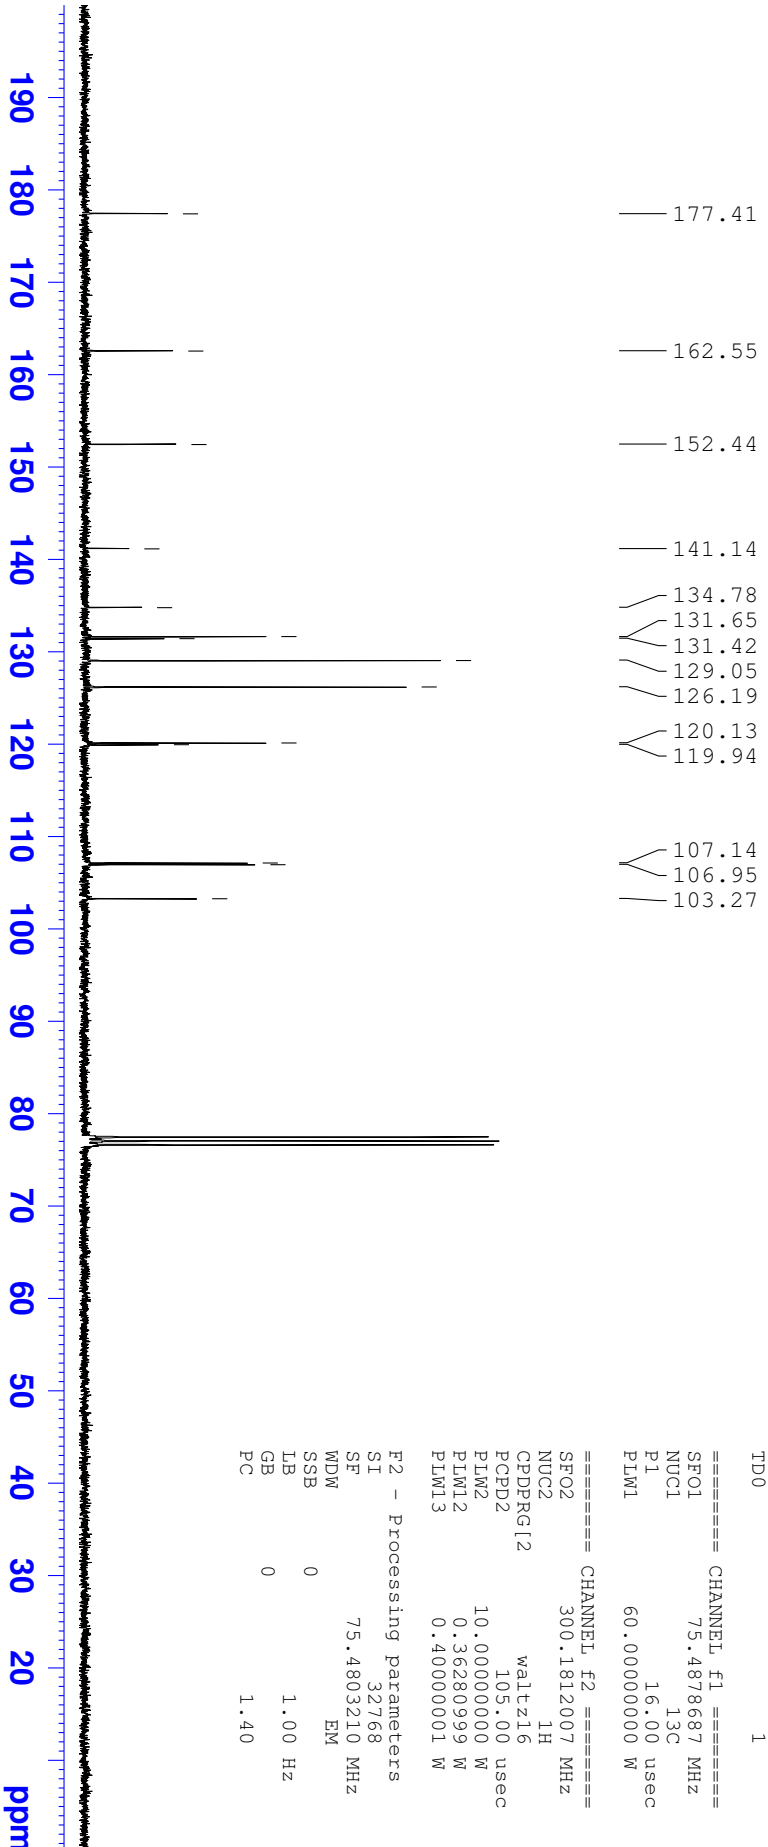

7.531  
7.522  
7.510  
7.505  
7.500  
7.497  
7.489  
7.456  
7.447  
7.443  
7.438  
7.433  
7.429  
7.425  
7.420  
7.417  
7.411  
7.396

7.009  
7.001

6.876  
6.867  
6.846  
6.838

7.531  
7.522  
7.510  
7.505  
7.500  
7.497  
7.489  
7.456  
7.447  
7.443  
7.438  
7.433  
7.429  
7.425  
7.420  
7.417  
7.411  
7.396  
7.009  
7.001  
6.876  
6.867  
6.846  
6.838  
4.770  
4.762  
2.584  
2.576  
2.568

```

Current Data Parameters
NAME       7P4PC
EXPNO     1
PROCNO    1

F2 - Acquisition Parameters
Date_     2014096
Time     11.35
INSTRUM  FOURIER200
PROBHD   5 mm DUL 13C-1
PULPROG  zg30
ID       65536
SOLVENT  CDCl3
NS       16
DS       2
SWH      6103.516 Hz
FIDRES   0.093132 Hz
AQ       5.3687091 sec
RG       31.8342
DW       81.920 usec
DE       6.50 usec
TE       295.6 K
D1       1.00000000 sec
TD0      1

===== CHANNEL f1 =====
SF01     300.1818537 MHz
NUC1     1H
P1       8.75 usec
PL1     25.00000000 W
PIWL

F2 - Processing parameters
SI       65536
SF       300.1800049 MHz
WDW      EM
SSB      0
GB       0
PC       1.00
  
```

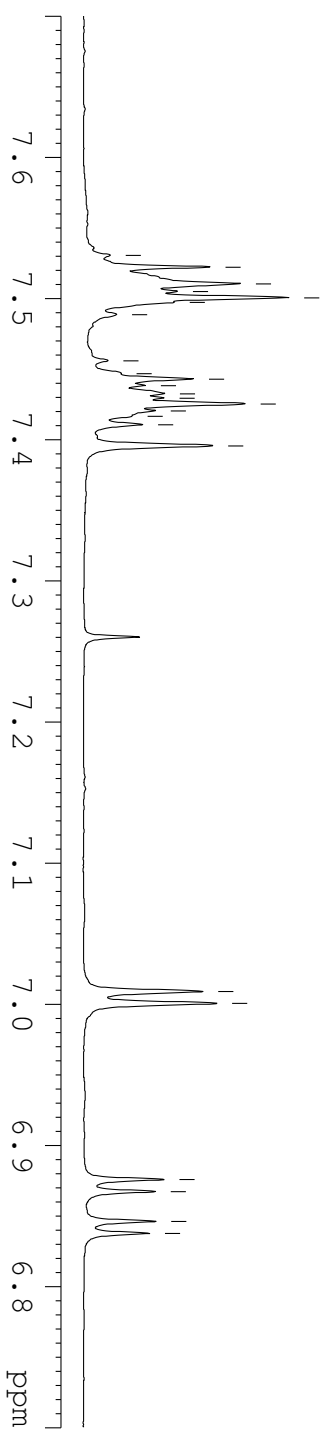

3.05  
3.05

1.00  
1.00

1.00

2.08

1.01

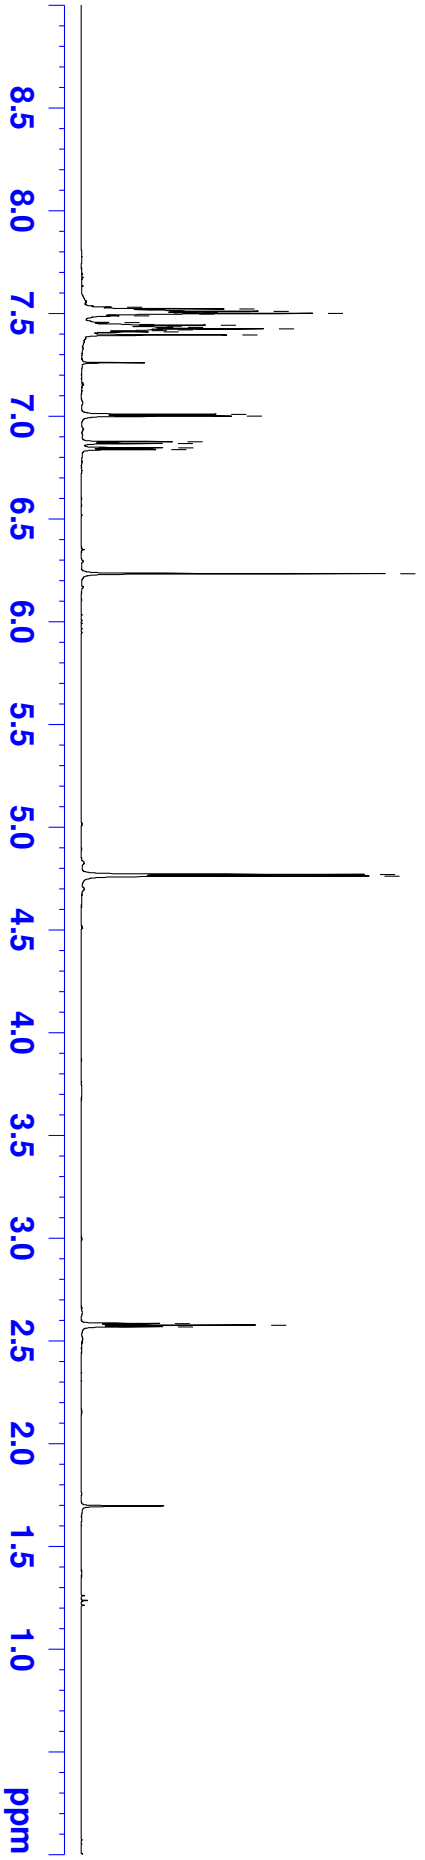

Current Data Parameters  
 NAME 7P4PC  
 EXPNO 2  
 PROCNO 1

F2 - Acquisition Parameters  
 Date\_ 20140506  
 Time 11.53

INSTRUM FOURIER300  
 PROBD 5 mm DUL 13C-1  
 PULPROG zgpg30  
 TD 65536  
 SOLVENT CDC13  
 NS 2000  
 DS 4

SWH 24414.063 Hz  
 FIDRES 0.372529 Hz  
 AQ 1.3421773 sec  
 RG 501.187  
 DW 20.480 usec  
 DE 6.50 usec  
 TE 295.8 K

D1 2.00000000 sec  
 D11 0.03000000 sec  
 D31 0.00001600 sec  
 D40 0.02432300 sec  
 L4 34  
 L5 49  
 P32 105.00 usec  
 TD0 1

==== CHANNEL f1 =====  
 SFO1 75.4878687 MHz  
 NUC1 13C  
 P1 16.00 usec  
 PLW1 60.00000000 W

==== CHANNEL f2 =====  
 SFO2 300.1812007 MHz  
 NUC2 1H  
 CPDPRG12 waltz16  
 PCPD2 105.00 usec  
 PLW2 10.00000000 W  
 PLW12 0.36280999 W  
 PLW13 0.400000001 W

F2 - Processing parameters  
 SI 32768  
 SF 75.4803210 MHz  
 WDDW EM  
 SSB 0  
 LB 1.00 Hz  
 GB 0  
 PC 1.40

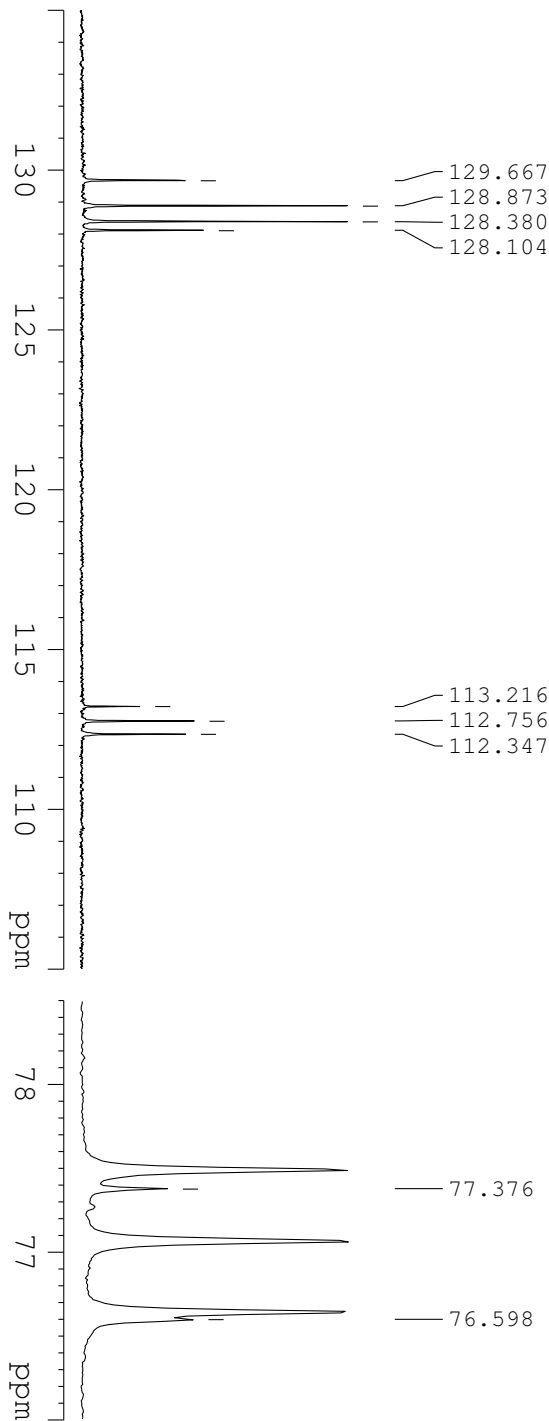

161.08  
 160.49  
 155.74  
 155.71

135.44  
 129.67  
 128.87  
 128.38  
 128.10

113.22  
 112.76  
 112.35

102.38

77.38  
 76.60

56.20

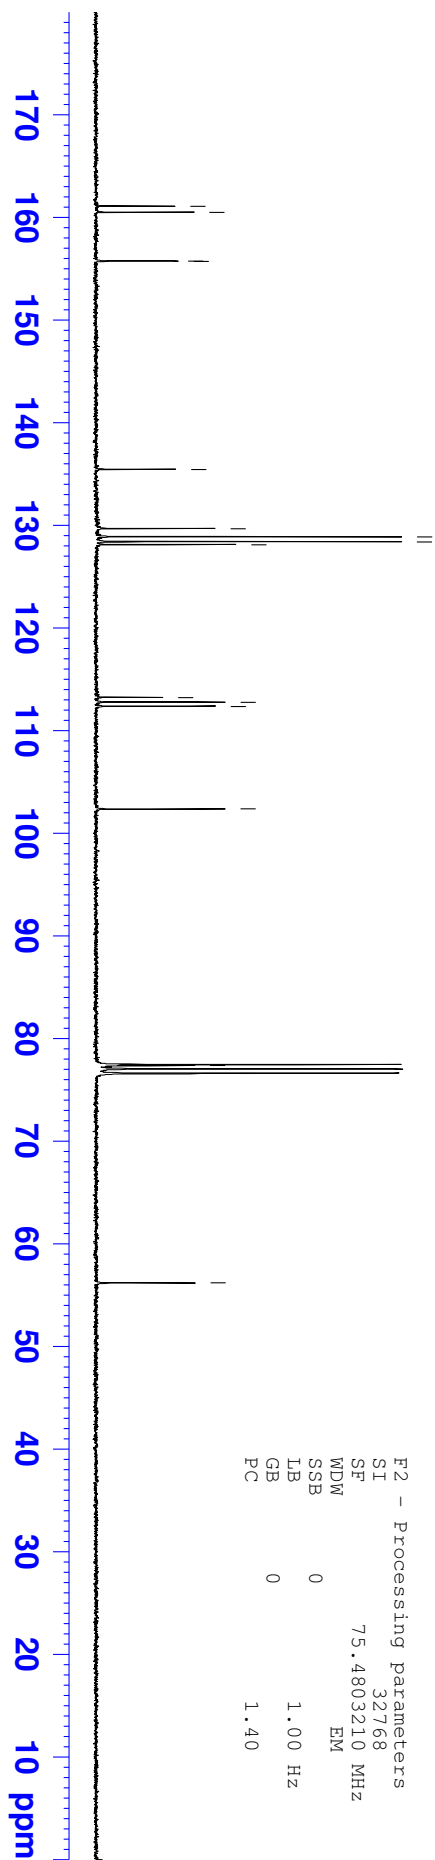

3-methyl-4-phenyl-7-propargyloxy-coumarin (7P3M4PC)

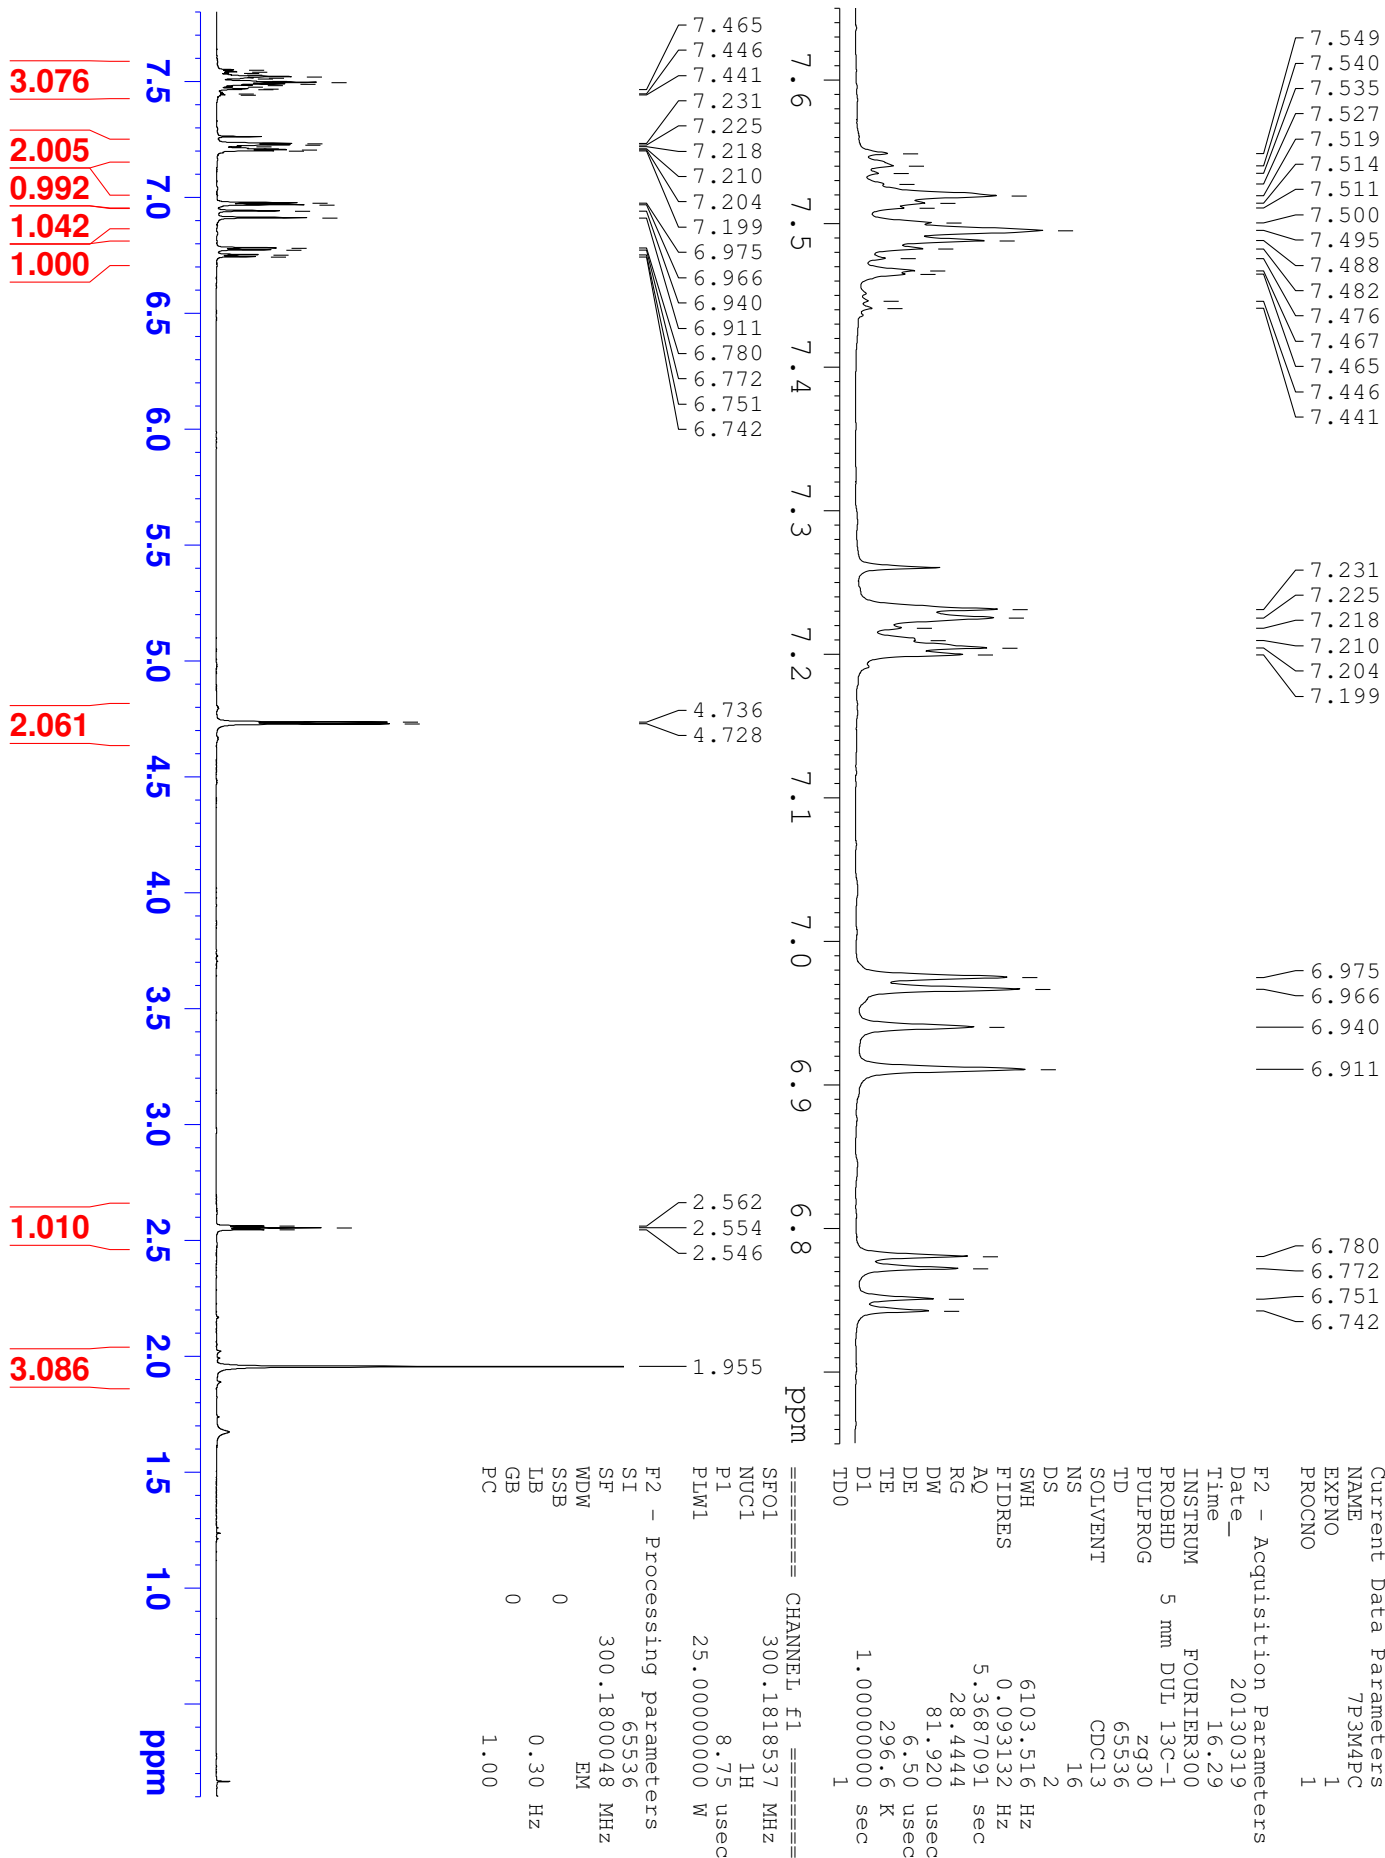

Current Data Parameters  
 NAME 7P3M4PC  
 EXPNO 1  
 PROCNO 1

F2 - Acquisition Parameters  
 Date\_ 20130319  
 Time 16.29  
 INSTRUM FOURIER300  
 PROBHD 5 mm DUL 13C-1  
 PULPROG zg30  
 TD 65536  
 SOLVENT CDCl3  
 NS 16  
 DS 2  
 SMH 6103.516 Hz  
 FIDRES 0.093132 Hz  
 AQ 5.3687091 sec  
 RG 28.4444  
 DW 81.920 usec  
 DE 6.50 usec  
 TE 296.6 K  
 D1 1.00000000 sec  
 TD0 1

==== CHANNEL f1 =====  
 SF01 300.1818537 MHz  
 NUC1 1H  
 P1 8.75 usec  
 PLW1 25.00000000 W

F2 - Processing parameters  
 SI 65536  
 SF 300.1800048 MHz  
 WDM EM  
 SSB 0  
 LB 0.30 Hz  
 GB 0  
 PC 1.00

3-methyl-4-phenyl-7-propargyloxy-coumarin (7P3M4PC)

Current Data Parameters  
 NAME 7P3M4PC  
 EXPNO 2  
 PROCNO 1

F2 - Acquisition Parameters  
 Date\_ 20130319  
 Time 16.33

INSTRUM FOURIER300  
 PROBDH 5 mm DUL 13C-1  
 PULPROG zgpg30  
 TD 65536  
 SOLVENT CDC13  
 NS 1009  
 DS 4

SWH 24414.063 Hz  
 FIDRES 0.372529 Hz  
 AQ 1.3421773 sec  
 RG 501.187  
 DW 20.480 usec  
 DE 6.50 usec  
 TE 296.8 K

D1 2.00000000 sec  
 D11 0.03000000 sec  
 D31 0.00001600 sec  
 D40 0.02432300 sec  
 L4 34  
 L5 49  
 P32 105.00 usec  
 TD0 1

==== CHANNEL f1 =====  
 SFO1 75.4878687 MHz  
 NUC1 13C  
 P1 16.00 usec  
 PLW1 60.00000000 W

==== CHANNEL f2 =====  
 SFO2 300.1812007 MHz  
 NUC2 1H  
 CPDPRG12 waltz16  
 PCPD2 105.00 usec  
 PLW2 25.00000000 W  
 PLW12 0.21336000 W  
 PLW13 0.23522000 W

F2 - Processing parameters  
 SI 32768  
 SF 75.4803210 MHz  
 WDW EM  
 SSB 0  
 LB 1.00 Hz  
 GB 0  
 PC 1.40

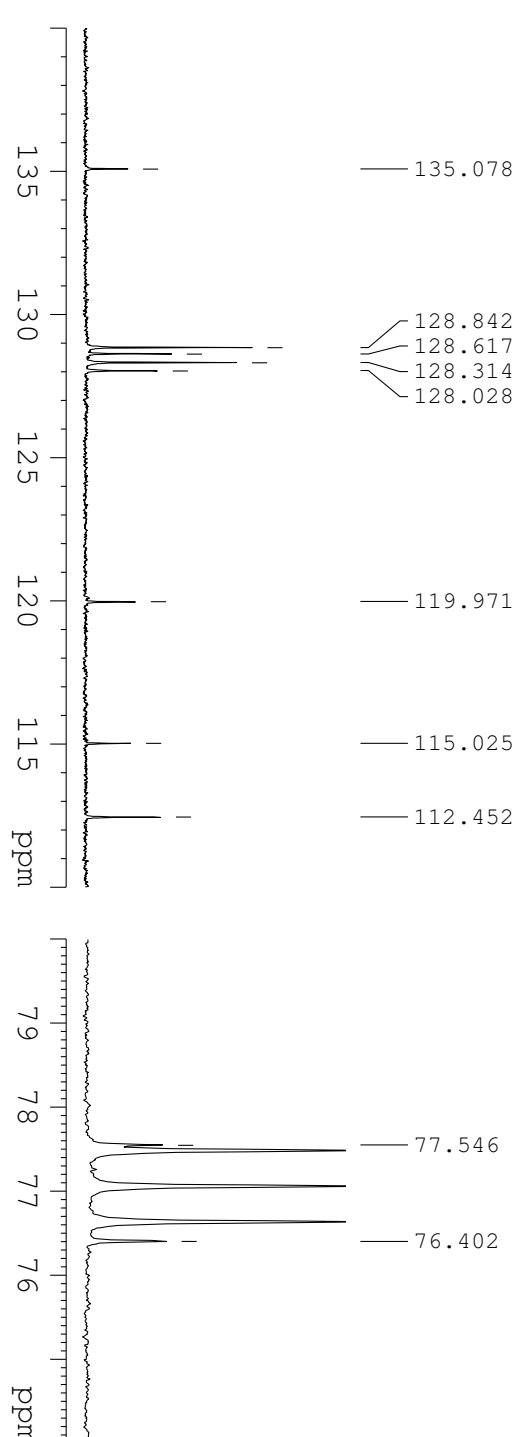

- 162.64
- 159.41
- 153.76
- 150.69
- 135.08
- 128.84
- 128.62
- 128.31
- 128.03
- 119.97
- 115.03
- 112.45
- 101.80
- 77.55
- 76.40
- 56.15
- 14.47

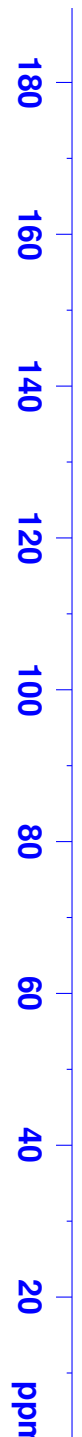

3M4P7PC (Compound 14)

7.545  
7.529  
7.513

6.954  
6.946  
6.939  
6.931  
6.923  
6.914

2.592  
2.584  
2.576

2.409  
2.406

7.545  
7.529  
7.513  
6.954  
6.946  
6.939  
6.931  
6.923  
6.914

6.162  
6.158

4.770  
4.763

2.592  
2.584  
2.576  
2.409  
2.406

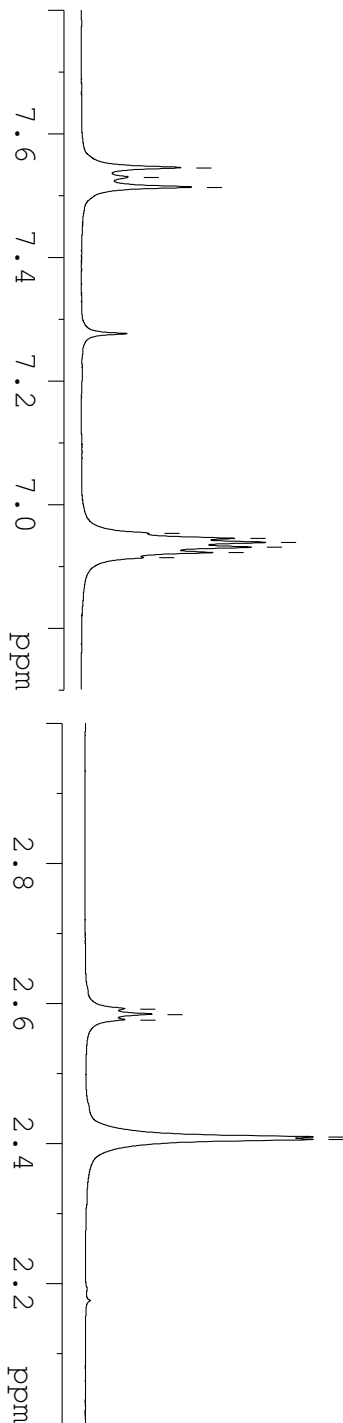

```

Current Data Parameters
NAME          7P4MC
EXPNO         1
PROCNO        1
F2 - Acquisition Parameters
Date_         20140630
Time          11.03
INSTRUM      FOURIER300
PROBHD       5 mm DUL 13C-1
PULPROG      zg30
TD            65536
SOLVENT      CDCl3
NS            16
DS            2
SWH           6103.516 Hz
FIDRES       0.093132 Hz
AQ           5.3687091 sec
RG            32
DW            81.920 usec
DE            6.50 usec
TE            295.9 K
D1            1.00000000 sec
TD0           1
===== CHANNEL f1 =====
SFO1         300.1818537 MHz
NUC1          1H
P1            8.75 usec
PLM1         25.00000000 W
F2 - Processing parameters
SI            65536
SF           300.180000 MHz
WDW           EM
SSB           0
GB            0
PC            1.00
  
```

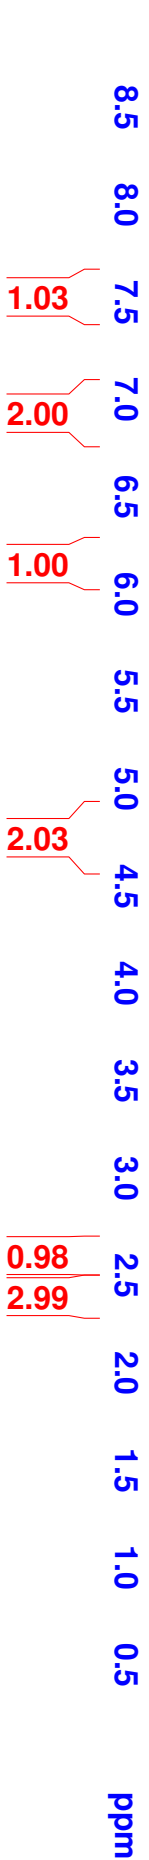

Current Data Parameters  
 NAME 7P4MC  
 EXPNO 2  
 PROCNO 1

F2 - Acquisition Parameters  
 Date\_ 20140706  
 Time 21.38

INSTRUM FOURIER300  
 PROBD 5 mm DUL 13C-1  
 PULPROG zgpg30  
 TD 65536  
 SOLVENT CDC13  
 NS 10000  
 DS 4

SWH 24414.063 Hz  
 FIDRES 0.372529 Hz  
 AQ 1.3421773 sec  
 RG 501.187  
 DW 20.480 usec  
 DE 6.50 usec  
 TE 296.3 K

D1 2.00000000 sec  
 D11 0.03000000 sec  
 D31 0.00001600 sec  
 D40 0.02432300 sec  
 L4 34  
 L5 49  
 P32 105.00 usec  
 TD0 1

==== CHANNEL f1 =====  
 SFO1 75.4878687 MHz  
 NUC1 13C  
 P1 16.00 usec  
 PLW1 60.00000000 W

==== CHANNEL f2 =====  
 SFO2 300.1812007 MHz  
 NUC2 1H  
 CPDPRG12 waltz16  
 PCPD2 105.00 usec  
 PLW2 10.00000000 W  
 PLW12 0.36280999 W  
 PLW13 0.40000001 W

F2 - Processing parameters  
 SI 32768  
 SF 75.4803210 MHz  
 WDW EM  
 SSB 0  
 LB 1.00 Hz  
 GB 0  
 PC 1.40

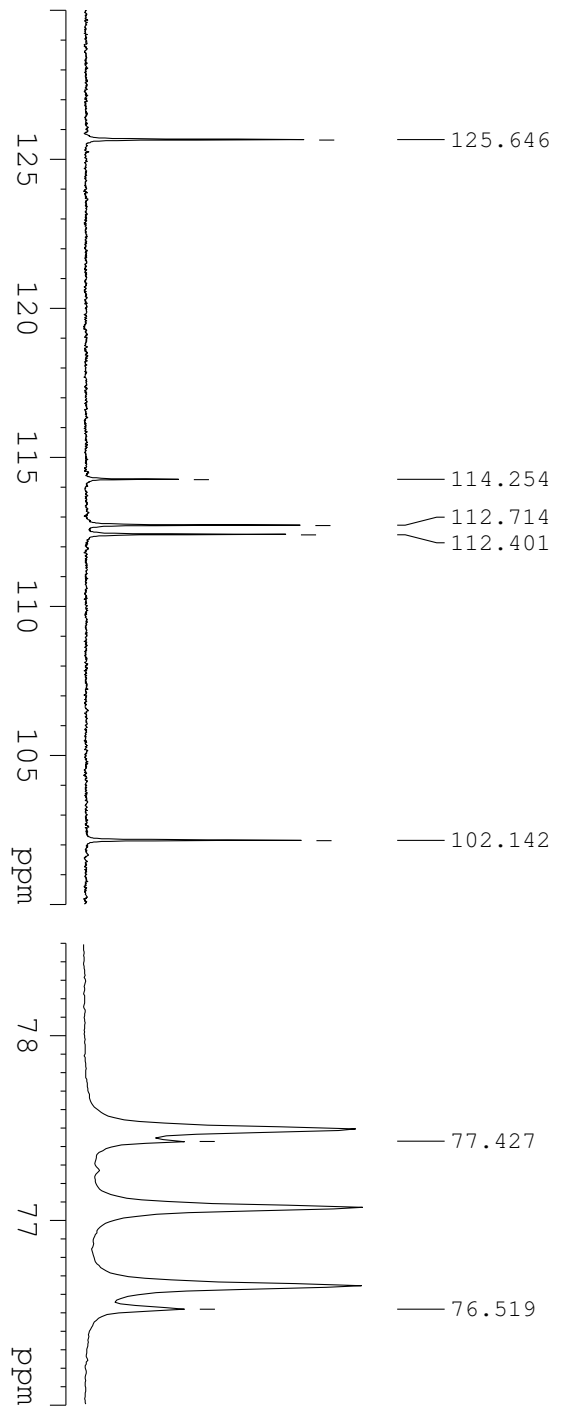

161.14  
 160.34  
 155.02  
 152.47  
 125.65  
 114.25  
 112.71  
 112.40  
 102.14  
 77.43  
 76.52

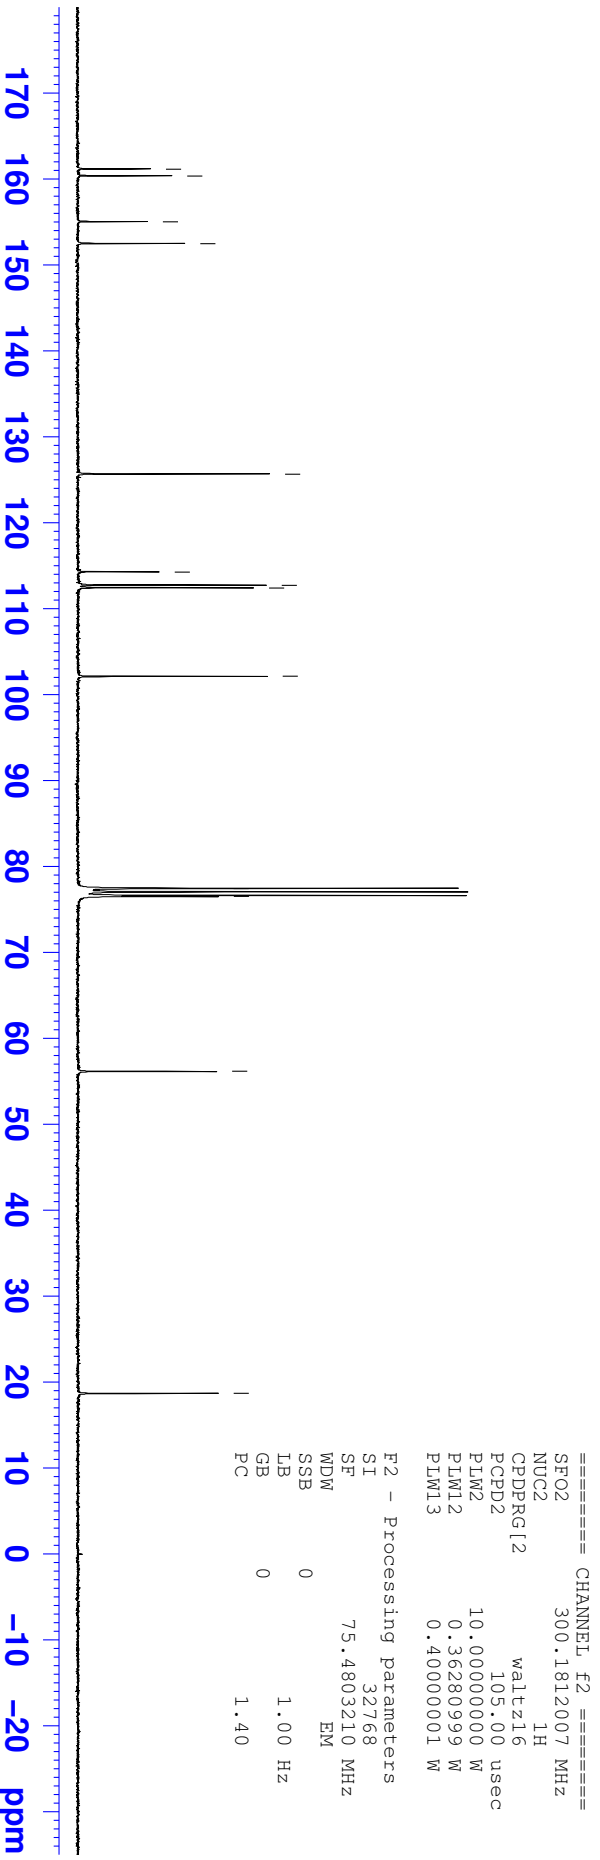

7.670  
7.664  
7.657  
7.651  
7.645  
7.639  
7.633

7.003  
6.997  
6.978  
6.970

7.003  
6.997  
6.978  
6.970

6.645  
6.643

7.8 7.7 7.6 7.5 7.4 7.3 7.2 7.1 7.0 6.9 6.8 6.7 6.6 ppm

7.670  
7.664  
7.657  
7.651  
7.645  
7.639  
7.633  
7.003  
6.997  
6.978  
6.970  
6.645  
6.643

4.792  
4.784

2.602  
2.594  
2.586

Current Data Parameters  
NAME 7P4TFC  
EXPNO 1  
PROCNO 1

F2 - Acquisition Parameters

Date\_ 20140508  
Time 11.01  
INSTRUM FOURIER300  
PROBHD 5 mm DUL 13C-1  
PULPROG zg30  
TD 65536  
SOLVENT CDCl3  
NS 16  
DS 2  
SWH 6103.516 Hz  
FIDRES 0.093132 Hz  
AQ 5.3687091 sec  
RG 52.2894  
DW 81.920 usec  
DE 6.50 usec  
TE 296.2 K  
D1 1.00000000 sec  
TD0 1

==== CHANNEL f1 =====  
SF01 300.1818537 MHz  
NUC1 1H  
P1 8.75 usec  
PLW1 25.00000000 W

F2 - Processing parameters  
SI 65536  
SF 300.1800051 MHz  
WDW EM  
SSB 0  
LB 0.30 Hz  
GB 0  
PC 1.00

4TF7PC (Compound 16)

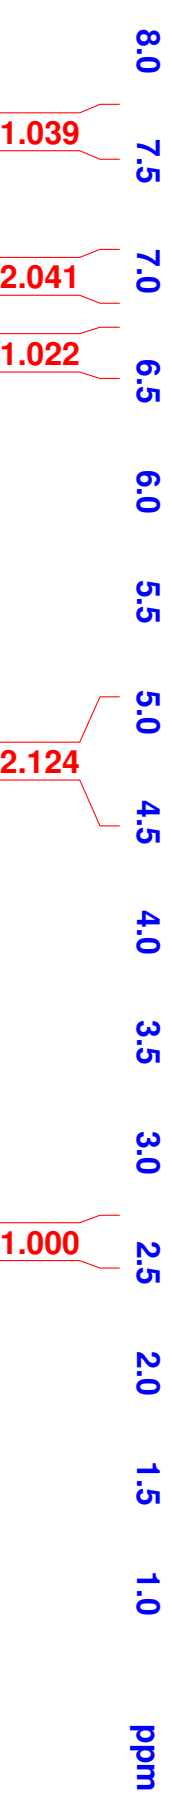



Current Data Parameters  
 NAME 7P4TFC  
 EXPNO 2  
 PROCNO 1

F2 - Acquisition Parameters  
 Date\_ 20140512  
 Time 11.57

INSTRUM FOURIER300  
 PROBHD 5 mm DUL 13C-1  
 PULPROG zgpg30  
 TD 65536  
 SOLVENT CDC13  
 NS 2000  
 DS 4  
 SWH 24414.063 Hz  
 FIDRES 0.372529 Hz  
 AQ 1.3421773 sec  
 RG 501.187  
 DW 20.480 usec  
 DE 6.50 usec  
 TE 296.1 K

D1 2.00000000 sec  
 D11 0.03000000 sec  
 D31 0.00001600 sec  
 D40 0.02432300 sec  
 L4 34  
 L5 49  
 P32 105.00 usec  
 TD0 1

==== CHANNEL F1 =====  
 SF01 75.4878687 MHz  
 NUC1 13C  
 P1 16.00 usec  
 PLW1 60.00000000 W

==== CHANNEL F2 =====  
 SF02 300.1812007 MHz  
 NUC2 1H  
 CPDPRG12 waltz16  
 PCPD2 105.00 usec  
 PLW2 10.00000000 W  
 PLW12 0.36280999 W  
 PLW13 0.400000001 W

F2 - Processing parameters  
 SI 32768  
 SF 75.4803210 MHz  
 WDW EM  
 SSB 0  
 LB 1.00 Hz  
 GB 0  
 PC 1.40

4TF7PC (Compound 16)

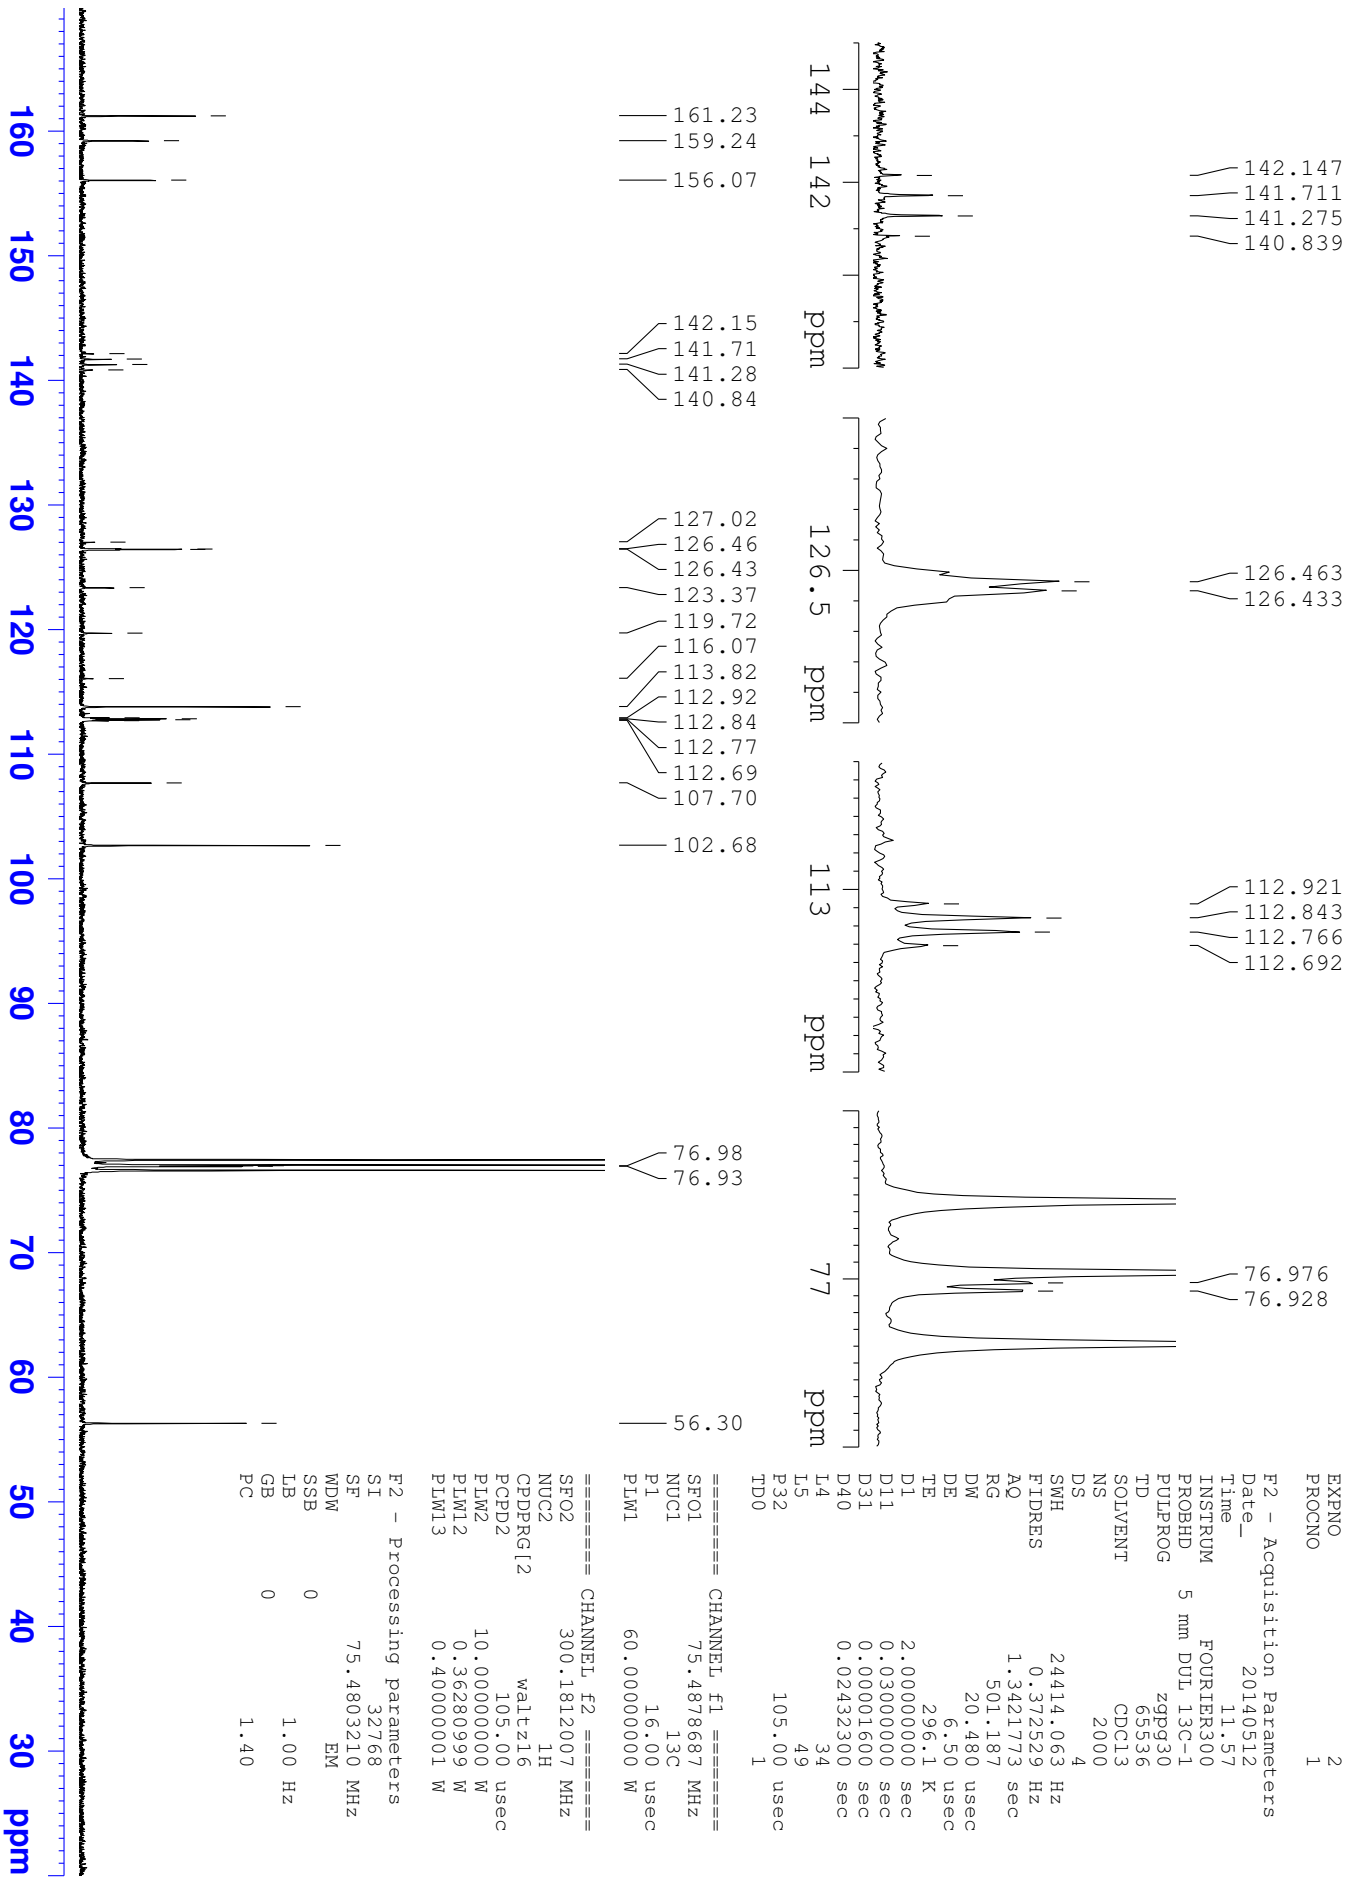

Current Data Parameters  
 NAME 78p4pc  
 EXPNO 1  
 PROCNO 1

F2 - Acquisition Parameters  
 Date\_ 20140513  
 Time\_ 17.14  
 INSTRUM FOURIER300  
 PROBD 5 mm PUL 13c-1  
 PULPROG zg30  
 TD 65536  
 SOLVENT CDCl3  
 NS 16  
 DS 2  
 SWH 6103.516 Hz  
 FIDRES 0.093132 Hz  
 AQ 5.3687091 sec  
 RG 41.2349  
 DW 81.920 usec  
 DE 6.50 usec  
 TE 295.9 K  
 D1 1.00000000 sec  
 TD0 1

==== CHANNEL f1 =====  
 SFO1 300.181537 MHz  
 NUC1 1H  
 P1 8.75 usec  
 FWH1 25.00000000 W

F2 - Processing parameters  
 SI 300.180048 MHz  
 SF 500.137566 MHz  
 NDM 0  
 NSB 0  
 LB 0.30 Hz  
 GB 0  
 FC 1.00

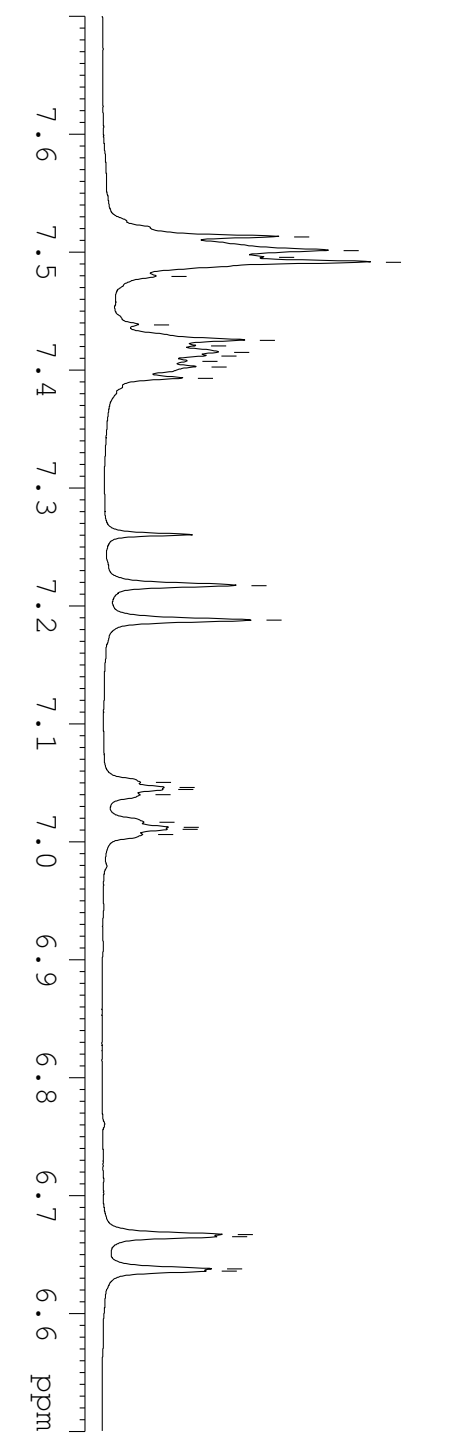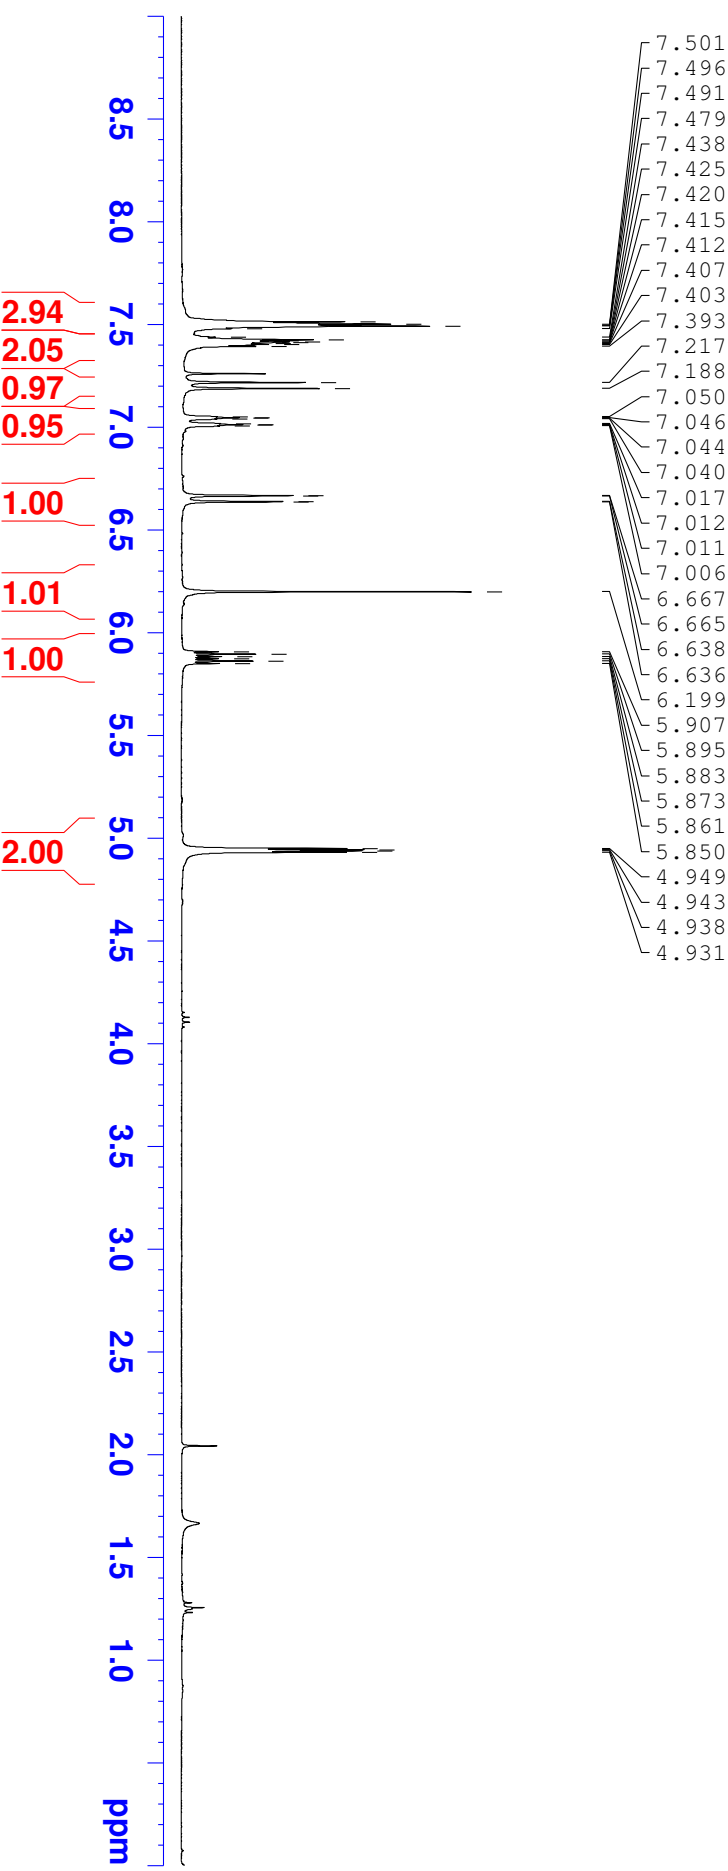

Current Data Parameters  
 NAME 78P4PC  
 EXPNO 2  
 PROCNO 1

F2 - Acquisition Parameters

Date\_ 20140513  
 Time 17.19  
 INSTRUM FOURIER300  
 PROBD 5 mm DUL 13C-1  
 PULPROG zgpg30  
 TD 65536  
 SOLVENT CDC13  
 NS 8000  
 DS 4  
 SWH 24414.063 Hz  
 FIDRES 0.372529 Hz  
 AQ 1.3421773 sec  
 RG 501.187  
 DW 20.480 usec  
 DE 6.50 usec  
 TE 296.1 K  
 D1 2.00000000 sec  
 D11 0.03000000 sec  
 D31 0.00001600 sec  
 D40 0.02432300 sec  
 L4 34  
 L5 49  
 P32 105.00 usec  
 TD0 1

==== CHANNEL F1 =====  
 SF01 75.4878687 MHz  
 NUC1 13C  
 P1 16.00 usec  
 PLW1 60.00000000 W

==== CHANNEL F2 =====  
 SF02 300.1812007 MHz  
 NUC2 1H  
 CPDPRG12 waltz16  
 PCPD2 105.00 usec  
 PLW2 10.00000000 W  
 PLW12 0.36280999 W  
 PLW13 0.40000001 W

F2 - Processing parameters  
 SI 32768  
 SF 75.4803210 MHz  
 WDDW EM  
 SSB 0  
 LB 1.00 Hz  
 GB 0  
 PC 1.40

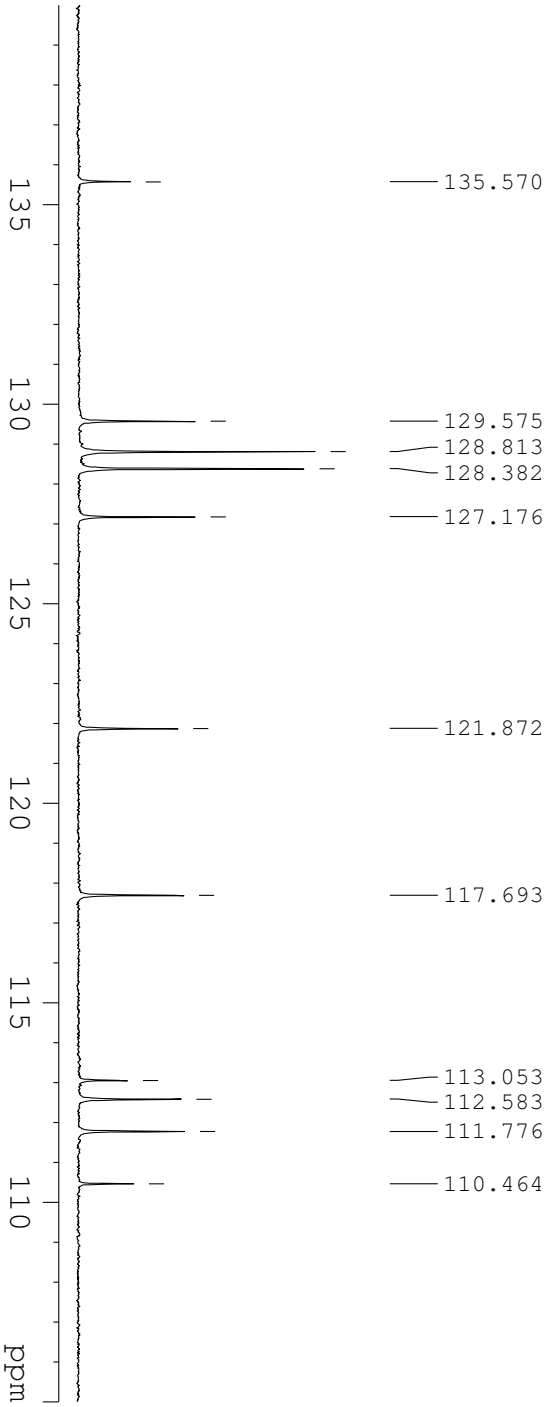

160.91  
 157.16  
 156.17  
 150.03  
 135.57  
 129.58  
 128.81  
 128.38  
 127.18  
 121.87  
 117.69  
 113.05  
 112.58  
 111.78  
 110.46

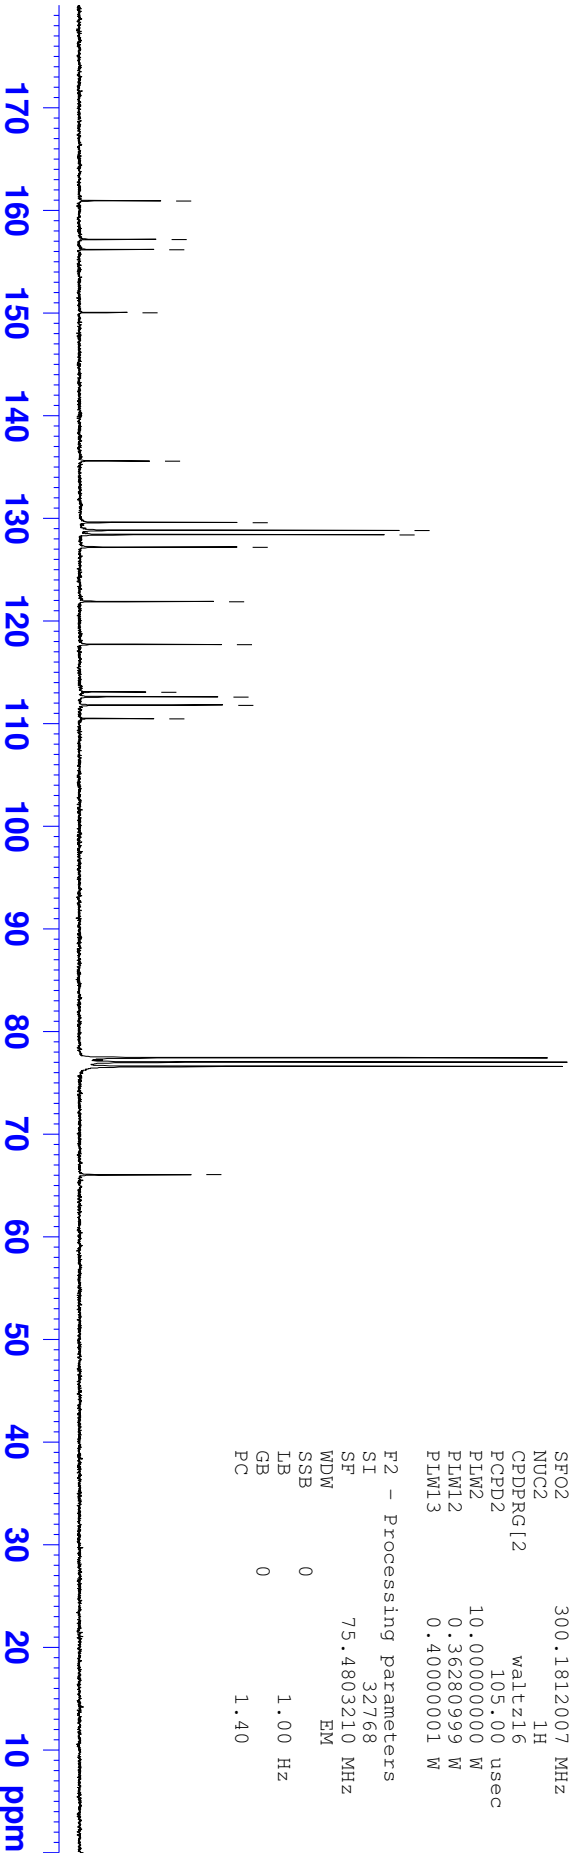

7.535  
7.527  
7.522  
7.514  
7.506  
7.501  
7.497  
7.487  
7.481  
7.474  
7.469  
7.462  
7.454  
7.451

7.211  
7.208  
7.205  
7.198  
7.190  
7.184  
7.179

7.052  
7.050  
7.045  
7.043  
7.039  
7.037  
7.018  
7.016  
7.012  
7.010  
7.005  
7.003

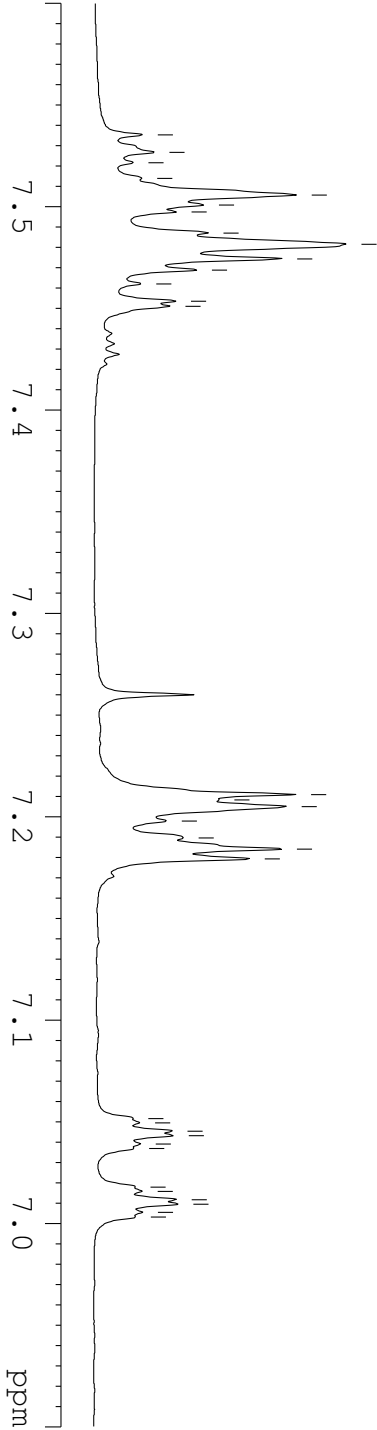

7.198  
7.190  
7.184  
7.179  
7.052  
7.050  
7.045  
7.043  
7.039  
7.037  
7.018  
7.016  
7.012  
7.010  
7.005  
7.003  
6.730  
6.701  
6.569  
6.567  
6.540  
6.538  
5.888  
5.876  
5.864  
5.854  
5.843  
5.831  
4.905  
4.899  
4.894  
4.887

```

Current Data Parameters
NAME       7H3M4PC_78pyran
EXPNO     1
PROCNO    1

F2 - Acquisition Parameters
Date_     20130504
Time      12.57
INSTRUM   FOURIER300
PROBHD    5 mm DUL 13C-1
PULPROG   zg30
TD         65536
SOLVENT   CDCl3
NS         16
DS         2
SWH        6103.516 Hz
FIDRES     0.093132 Hz
AQ         5.3687091 sec
RG         21.1497
DE         81.920 usec
TE         296.6 K
D1         1.00000000 sec
TD0        1

===== CHANNEL f1 =====
SFO1      300.1818537 MHz
NUC1      1H
P1        8.75 usec
PLW1      25.00000000 W

F2 - Processing parameters
SI         65536
SF         300.1800049 MHz
WDW        EM
SSB        0
LB         0.30 Hz
GB         0
PC         1.00
    
```

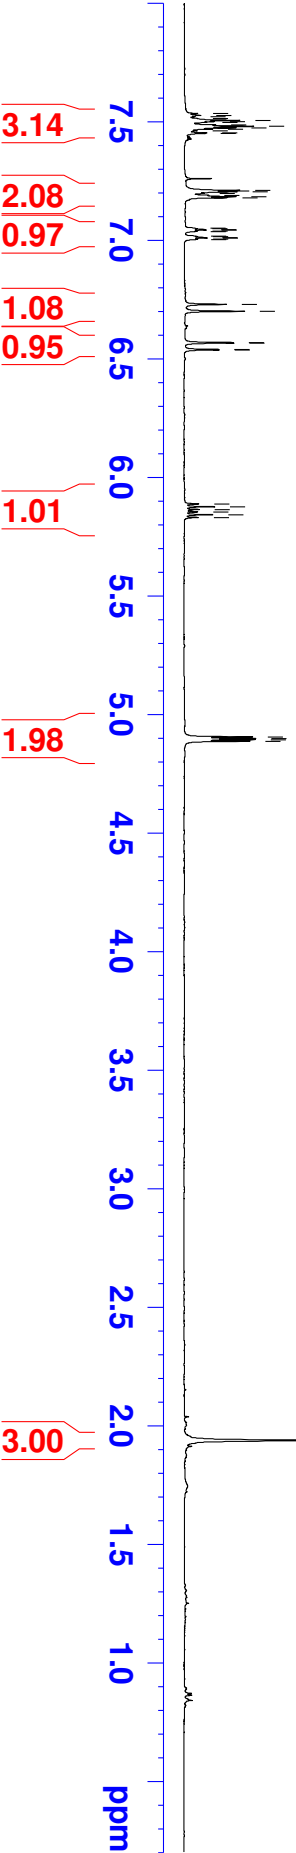

3.14  
2.08  
0.97  
1.08  
0.95  
1.01  
1.98  
3.00

78P3M4PC

Current Data Parameters  
 NAME 7H3M4PC\_78pyran  
 EXPNO 2  
 PROCNO 1

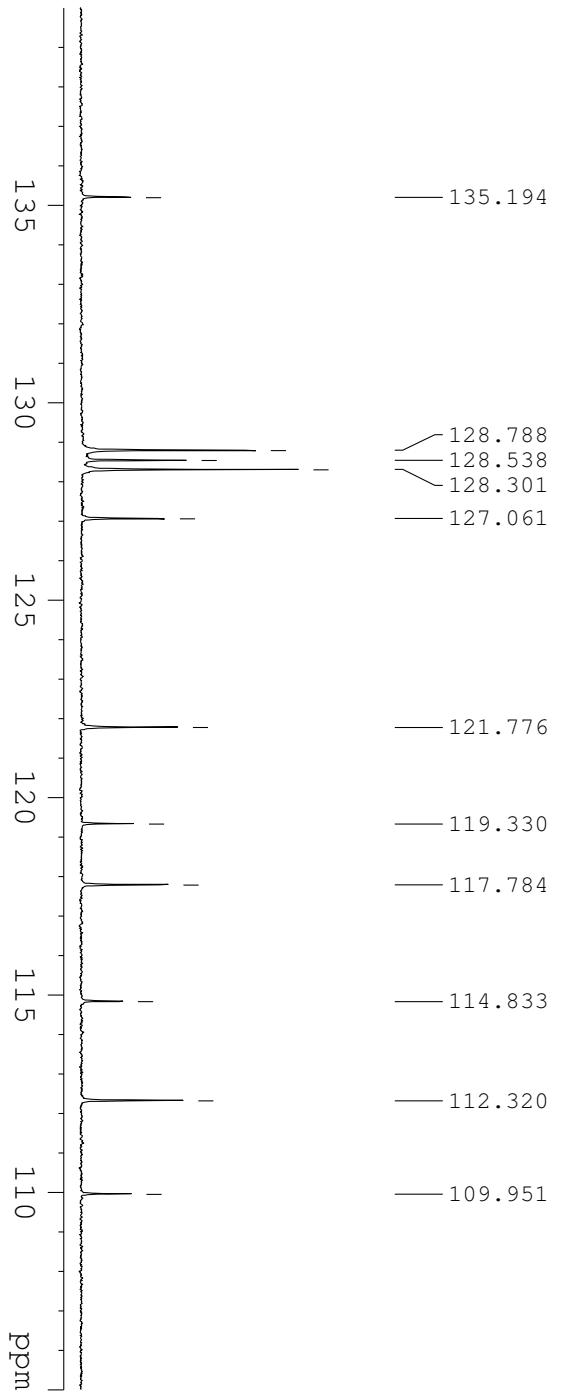

162.42  
 155.96  
 151.12  
 148.20  
 135.19  
 128.79  
 128.54  
 128.30  
 127.06  
 121.78  
 119.33  
 117.78  
 114.83  
 112.32  
 109.95

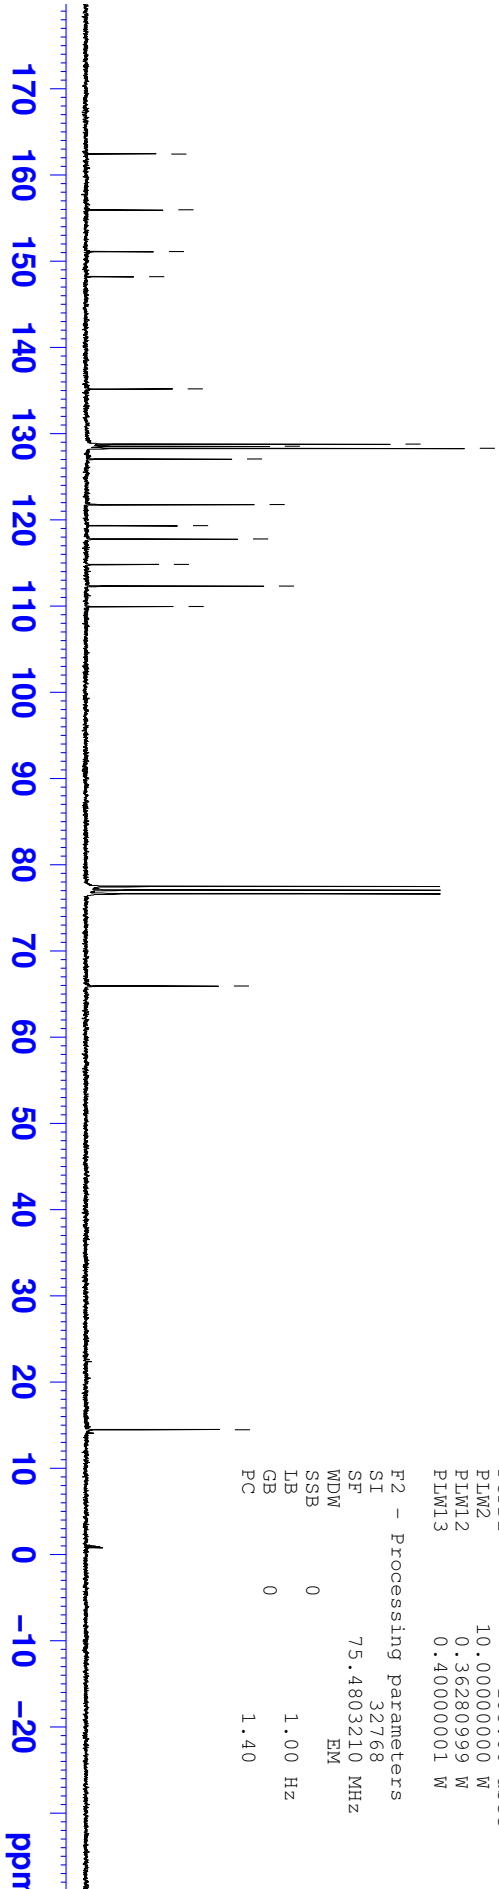

==== CHANNEL F1 =====  
 SFO1 75.4878687 MHz  
 NUC1 13C  
 P1 16.00 usec  
 PLW1 60.00000000 W

==== CHANNEL F2 =====  
 SFO2 300.1812007 MHz  
 NUC2 1H  
 CPDPRG12 waltz16  
 PCPD2 105.00 usec  
 PLW2 10.00000000 W  
 PLW12 0.36280999 W  
 PLW13 0.40000001 W

F2 - Processing parameters  
 SI 32768  
 SF 75.4803210 MHz  
 WDW EM  
 SSB 0  
 LB 1.00 Hz  
 GB 0  
 PC 1.40

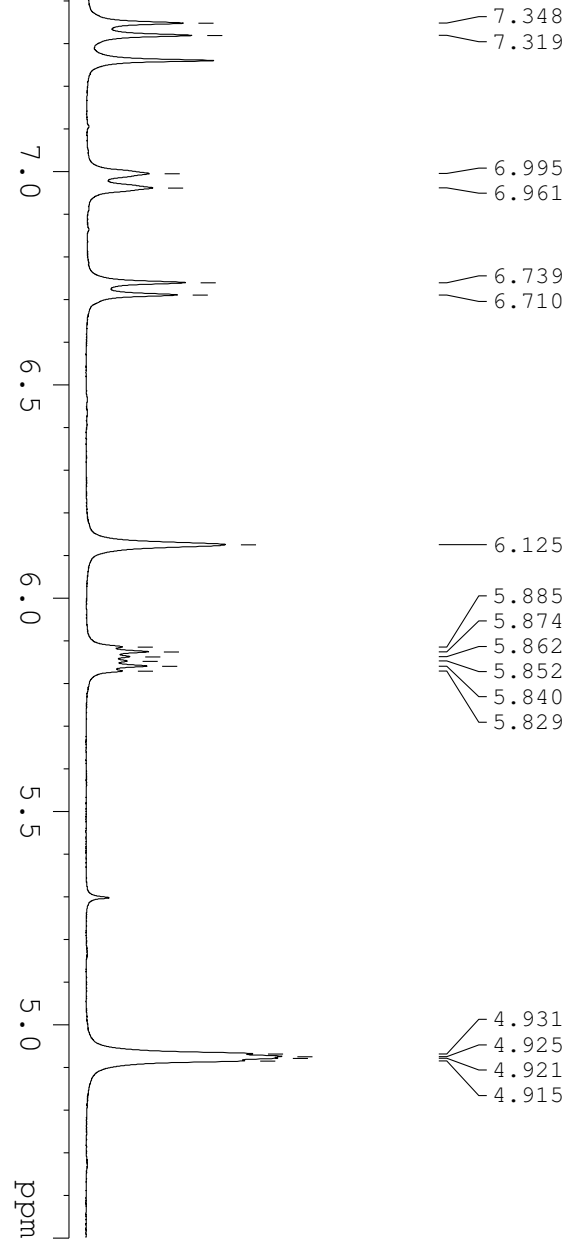

Current Data Parameters  
 NAME 78P4MC  
 EXNO 1  
 PROCNO 1

F2 - Acquisition Parameters  
 Date\_ 20140722  
 Time 12.39  
 INSTRUM FOURIER300  
 PROBHD 5 mm DUL 13C-1  
 PULPROG zg30  
 TD 65536  
 SOLVENT CDCl3  
 NS 32  
 DS 2  
 SWH 6103.516 Hz  
 FIDRES 0.093132 Hz  
 AQ 5.3687091 sec  
 RG 841.1644  
 DW 81.920 usec  
 DE 6.50 usec  
 TE 295.8 K  
 D1 1.00000000 sec  
 IDU 1

==== CHANNEL f1 =====  
 SFO1 300.1818537 MHz  
 NUC1 13C  
 P1 8.15 usec  
 F1 25.00000000 W  
 FLM1 W

F2 - Processing parameters  
 SI 65536  
 SF 300.1800048 MHz  
 MDM 0 EM  
 SSB 0  
 LB 0 0.30 Hz  
 GB 0  
 PC 1.00

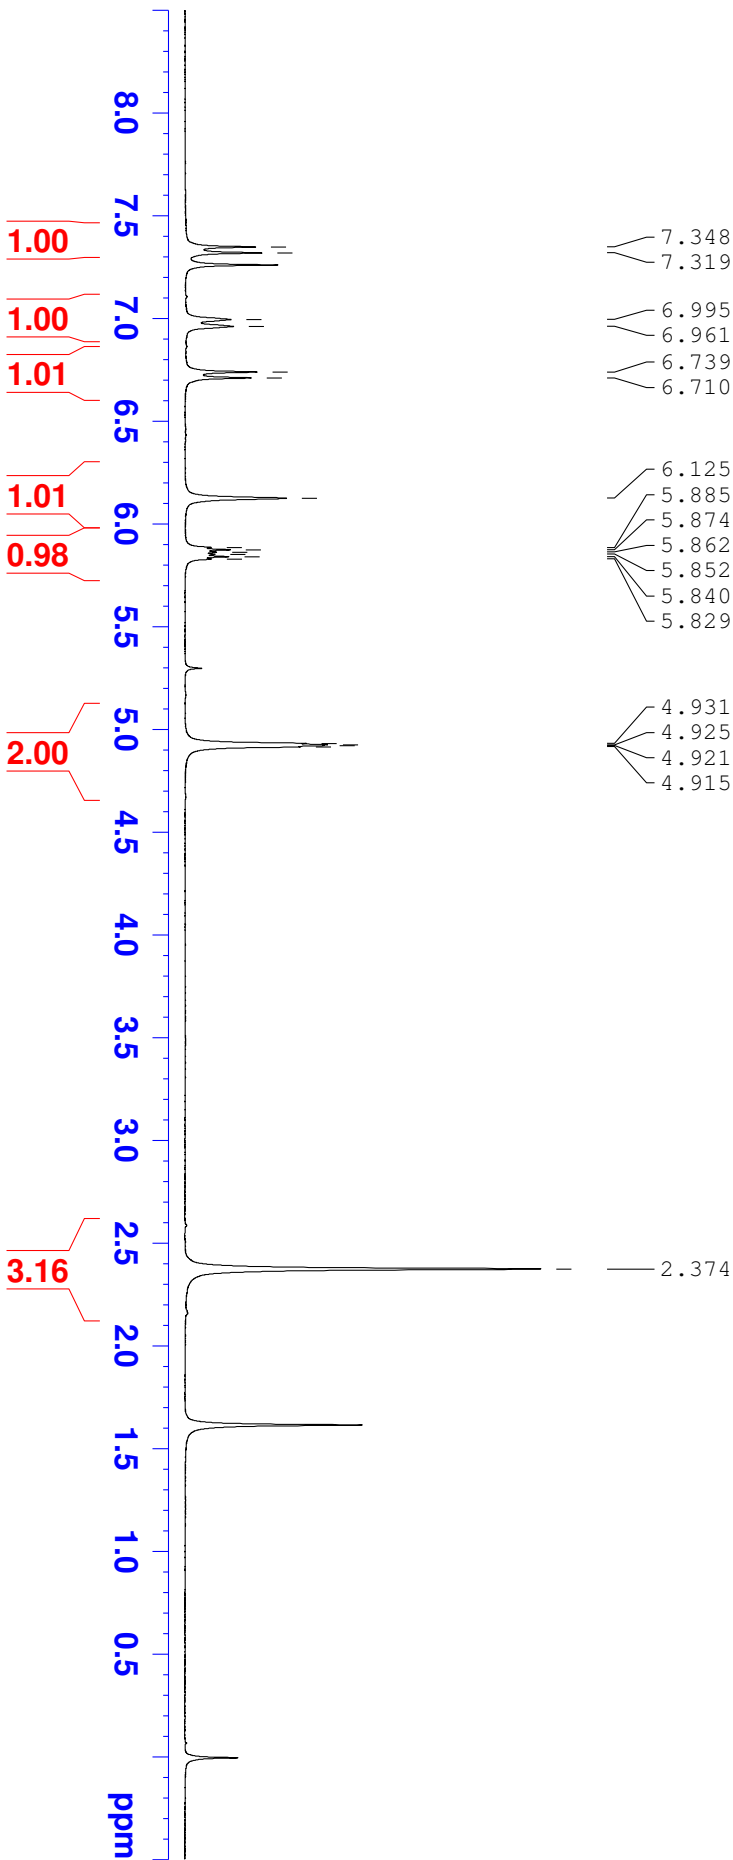

Current Data Parameters  
 NAME 78P4MC  
 EXPNO 2  
 PROCNO 1

F2 - Acquisition Parameters  
 Date\_ 20140725  
 Time 17.50

INSTRUM FOURIER300  
 PROBD 5 mm DUL 13C-1  
 PULPROG zgpg30

TD 65536  
 SOLVENT CDC13  
 NS 20000  
 DS 4

SWH 24414.063 Hz  
 FIDRES 0.372529 Hz  
 AQ 1.3421773 sec

RG 501.187  
 DW 20.480 usec  
 DE 6.50 usec  
 TE 295.7 K

D1 2.00000000 sec  
 D11 0.03000000 sec  
 D31 0.00001600 sec  
 D40 0.02432300 sec

L4 34  
 L5 49  
 P32 105.00 usec  
 TD0 1

==== CHANNEL F1 =====  
 SFO1 75.4878687 MHz  
 NUC1 13C  
 P1 16.00 usec  
 PLW1 60.00000000 W

==== CHANNEL F2 =====  
 SFO2 300.1812007 MHz  
 NUC2 1H  
 CPDPRG12 waltz16  
 PCPD2 105.00 usec  
 PLW2 10.00000000 W  
 PLW12 0.36280999 W  
 PLW13 0.40000001 W

F2 - Processing parameters  
 SI 32768  
 SF 75.4803210 MHz  
 WDW EM  
 SSB 0  
 LB 1.00 Hz  
 GB 0  
 PC 1.40

- 161.00
- 156.97
- 152.87
- 149.37
- 124.56
- 121.84
- 117.72
- 114.07
- 112.54
- 111.90
- 110.28

65.99

18.78

4M78PC (Compound 19)

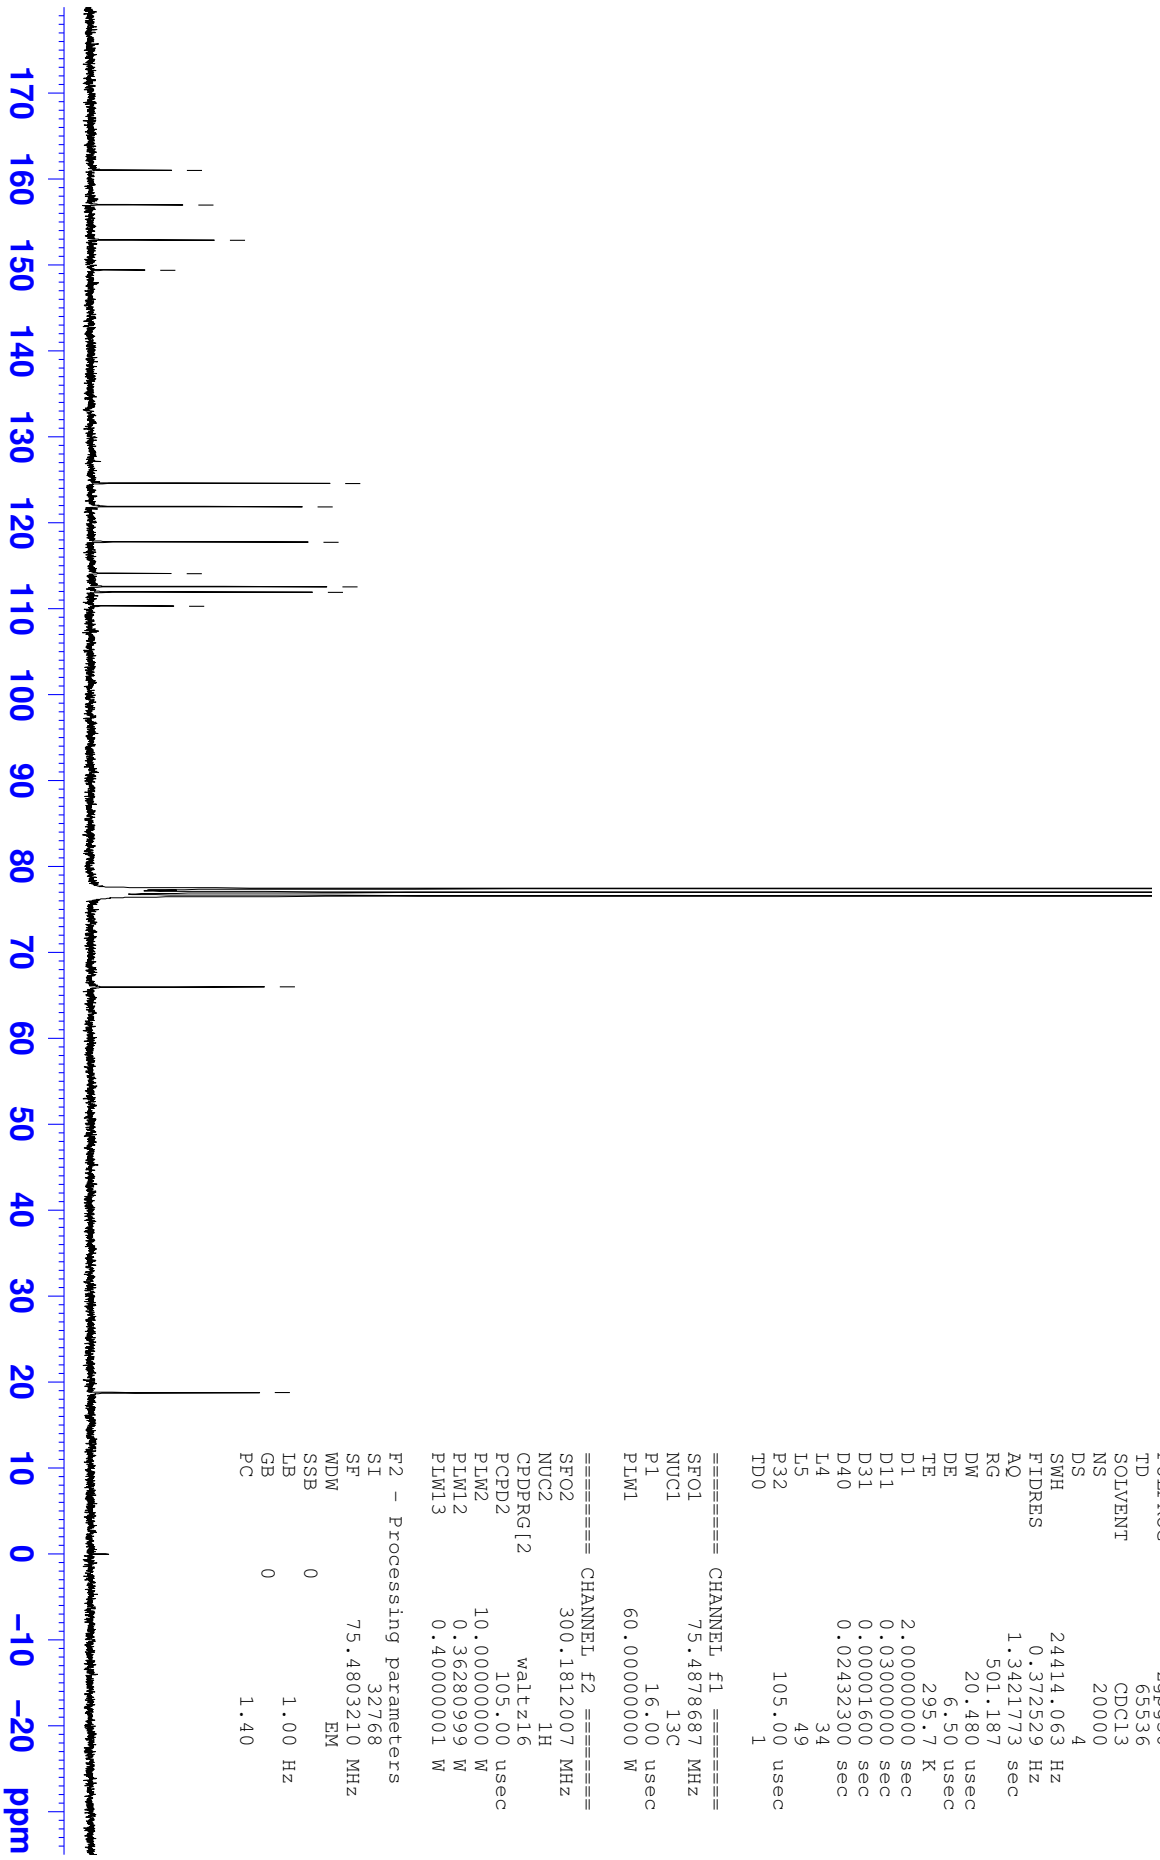

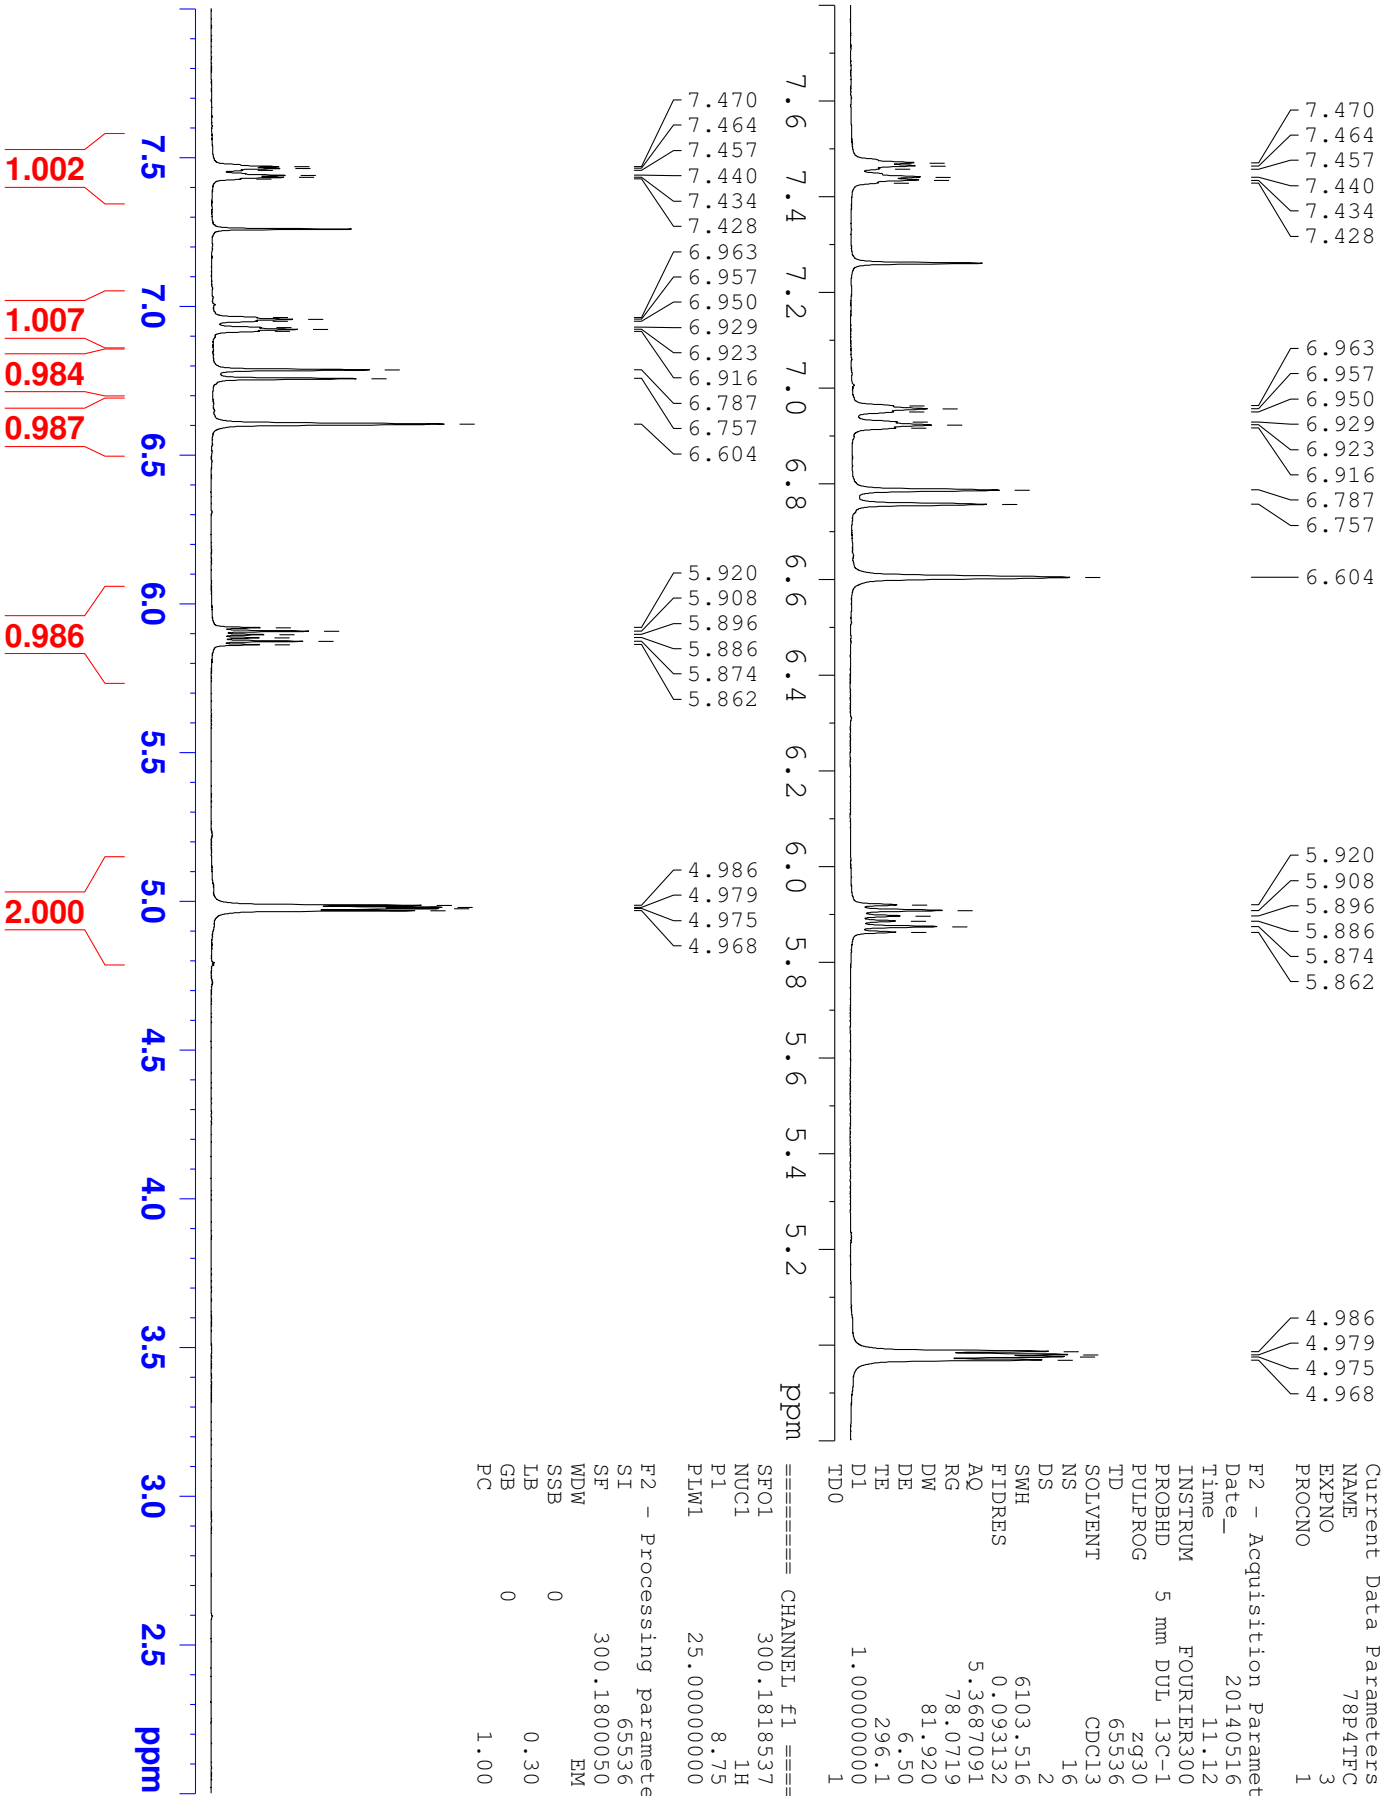

Current Data Parameters  
 NAME 78P4TFC  
 EXPNO 3  
 PROCNO 1

F2 - Acquisition Parameters  
 Date\_ 20140516  
 Time 11.12  
 INSTRUM FOURIER300  
 PROBHD 5 mm DUL 13C-1  
 PULPROG zg30  
 TD 65536  
 SOLVENT CDCl3  
 NS 16  
 DS 2  
 SMH 6103.516 Hz  
 FIDRES 0.093132 Hz  
 AQ 5.3687091 sec  
 RG 78.0719  
 DW 81.920 usec  
 DE 6.50 usec  
 TE 296.1 K  
 D1 1.00000000 sec  
 TD0 1

==== CHANNEL f1 =====  
 SF01 300.1818537 MHz  
 NUC1 1H  
 P1 8.75 usec  
 PLW1 25.00000000 W

F2 - Processing parameters  
 SI 65536  
 SF 300.1800050 MHz  
 WDW EM  
 SSB 0  
 LB 0.30 Hz  
 GB 0  
 PC 1.00



Current Data Parameters  
 NAME 78P4TFC  
 EXPNO 2  
 PROCNO 1

F2 - Acquisition Parameters

Date\_ 20140519  
 Time 17.47  
 INSTRUM FOURIER300  
 PROBD 5 mm DUL 13C-1  
 PULPROG zgpg30  
 TD 65536  
 SOLVENT CDC13  
 NS 10000  
 DS 4  
 SWH 24414.063 Hz  
 FIDRES 0.372529 Hz  
 AQ 1.3421773 sec  
 RG 501.187  
 DW 20.480 usec  
 DE 6.50 usec  
 TE 296.2 K  
 D1 2.00000000 sec  
 D11 0.03000000 sec  
 D31 0.00001600 sec  
 D40 0.02432300 sec  
 L4 34  
 L5 49  
 P32 105.00 usec  
 TD0 1

==== CHANNEL F1 =====  
 SF01 75.4878687 MHz  
 NUC1 13C  
 P1 16.00 usec  
 PLW1 60.00000000 W

==== CHANNEL F2 =====  
 SF02 300.1812007 MHz  
 NUC2 1H  
 CPDPRG12 waltz16  
 PCPD2 105.00 usec  
 PLW2 10.00000000 W  
 PLW12 0.36280999 W  
 PLW13 0.40000001 W

F2 - Processing parameters  
 SI 32768  
 SF 75.4803210 MHz  
 WDDW EM  
 SSB 0  
 LB 1.00 Hz  
 GB 0  
 PC 1.40

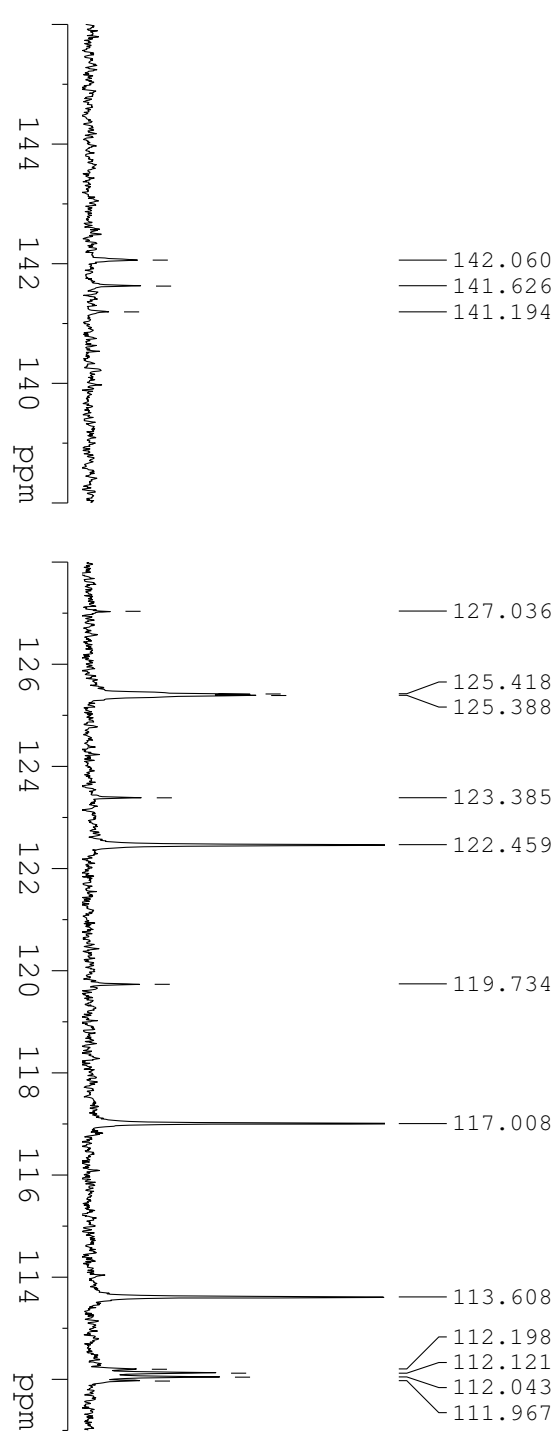

159.12  
 157.99  
 150.21  
 142.06  
 141.63  
 141.19  
 127.04  
 125.42  
 125.39  
 123.39  
 122.46  
 119.73  
 117.01  
 113.61  
 112.20  
 112.12  
 112.04  
 111.97  
 110.62  
 107.52  
 66.26

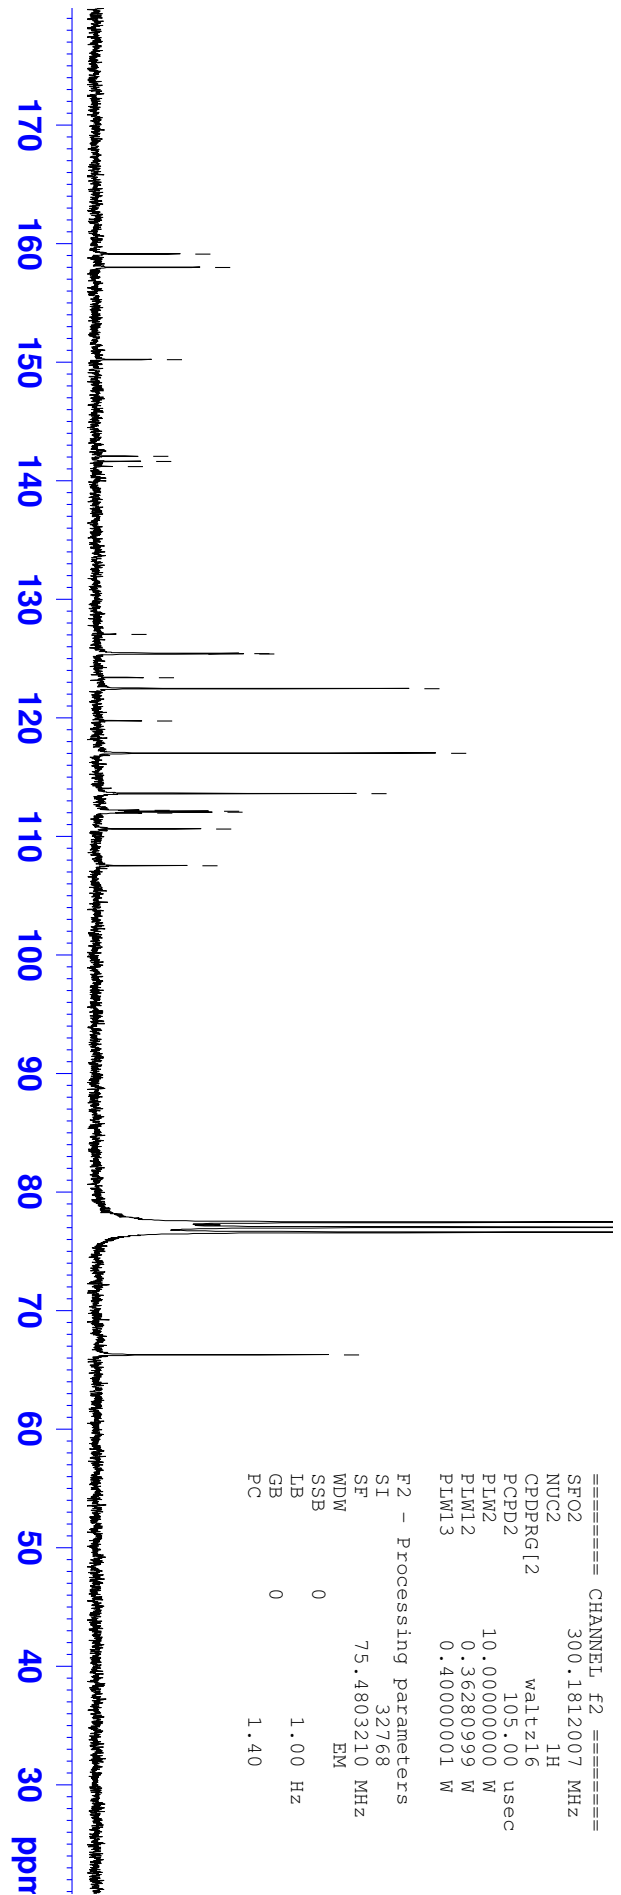

4P78FC (Compound 21)

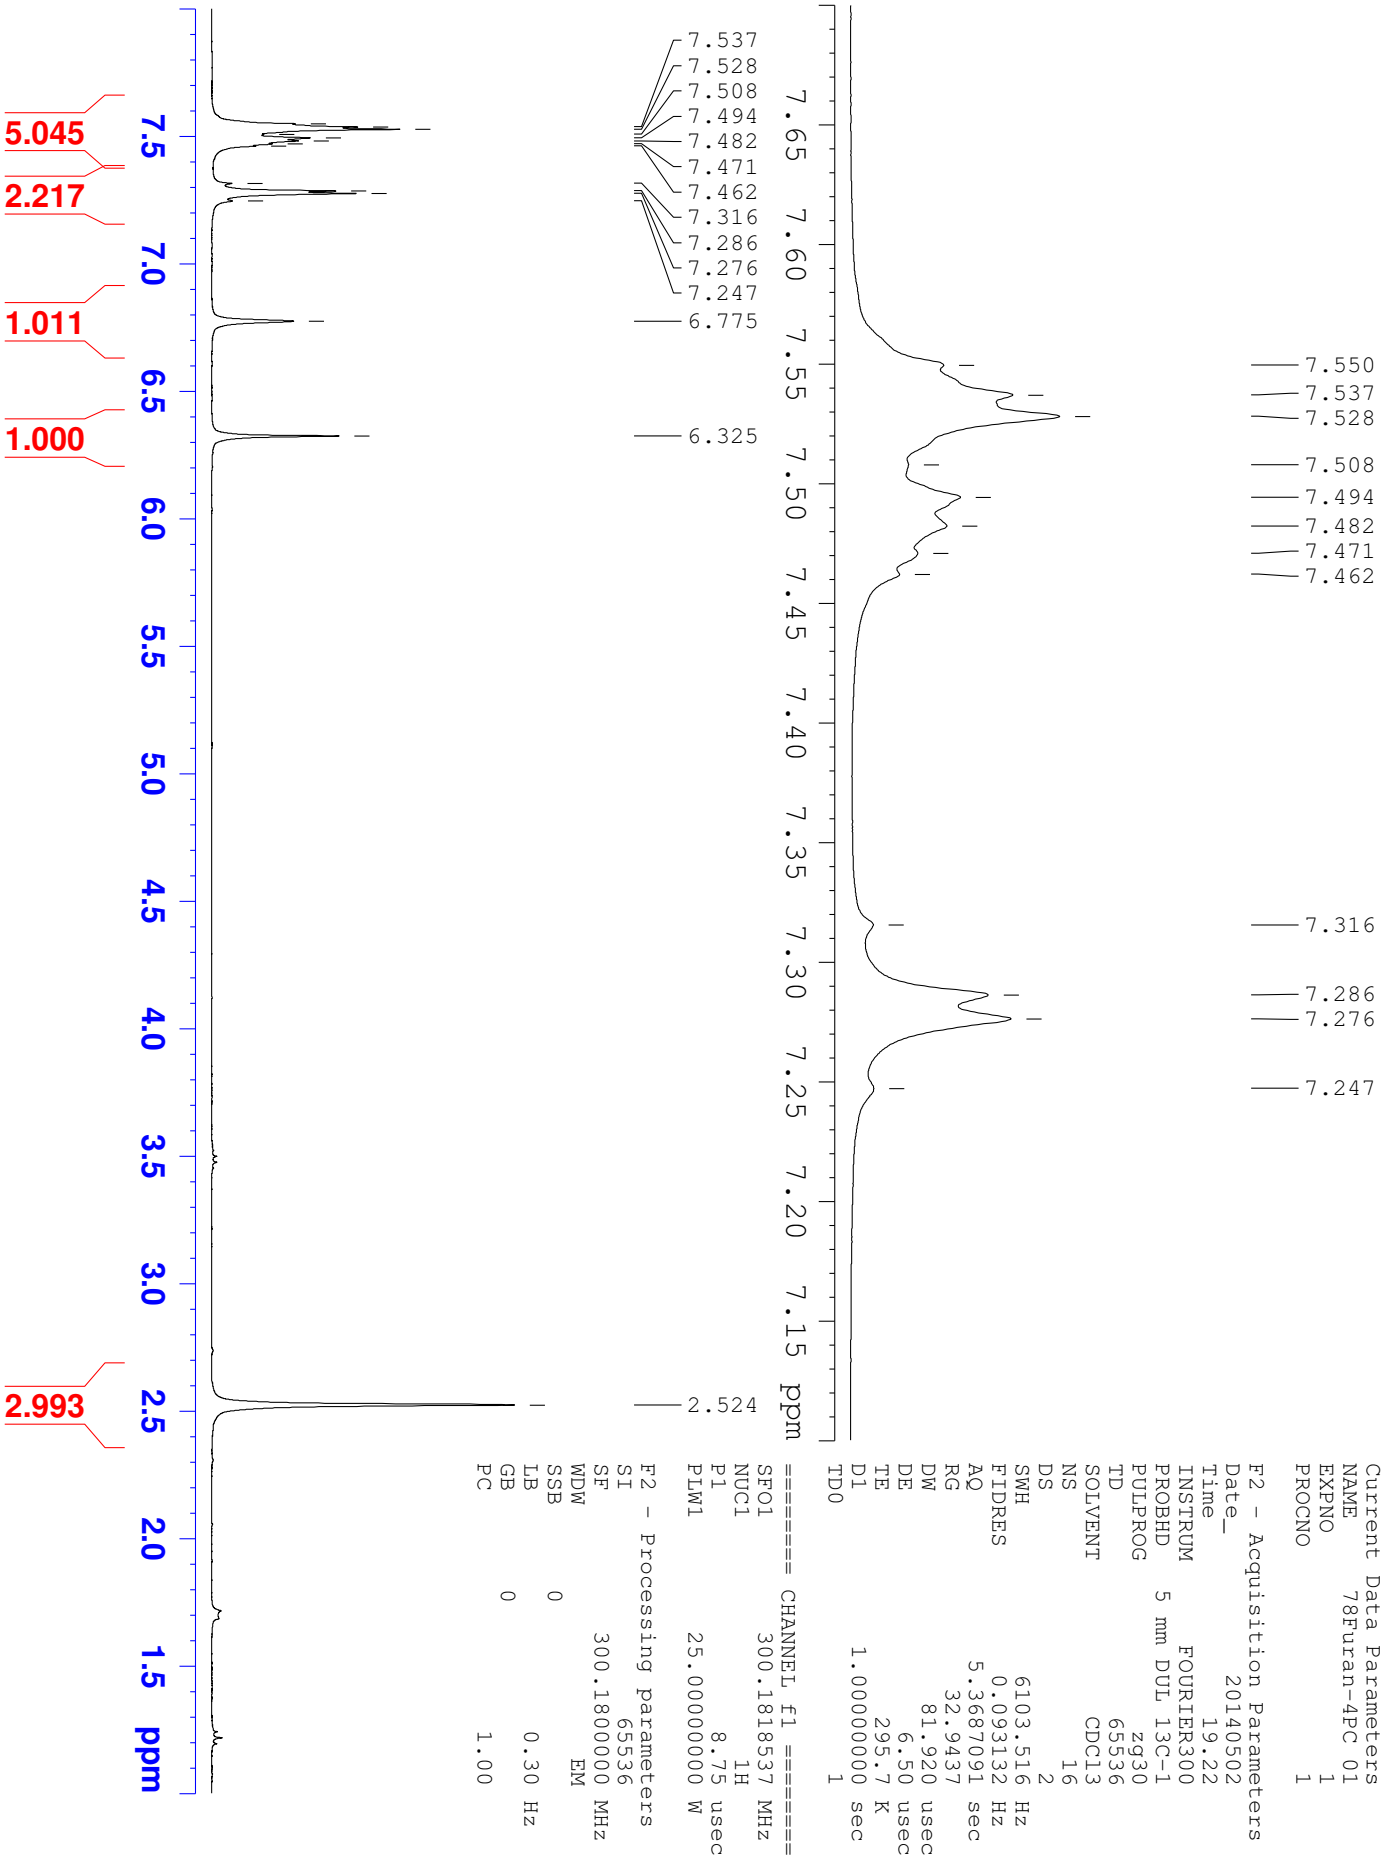

Current Data Parameters  
 NAME 78Furan-4PC 01  
 EXPNO 1  
 PROCNO 1

F2 - Acquisition Parameters

Date\_ 20140502  
 Time 19.22  
 INSTRUM FOURIER300  
 PROBHD 5 mm DUL 13C-1  
 PULPROG zg30  
 TD 65536  
 SOLVENT CDCl3  
 NS 16  
 DS 2  
 SMH 6103.516 Hz  
 FIDRES 0.093132 Hz  
 AQ 5.3687091 sec  
 RG 32.9437  
 DW 81.920 usec  
 DE 6.50 usec  
 TE 295.7 K  
 D1 1.00000000 sec  
 TD0 1

==== CHANNEL f1 =====  
 SF01 300.1818537 MHz  
 NUC1 1H  
 P1 8.75 usec  
 PLW1 25.00000000 W

F2 - Processing parameters  
 SI 65536  
 SF 300.1800000 MHz  
 WDW EM  
 SSB 0  
 LB 0.30 Hz  
 GB 0  
 PC 1.00

4P78FC (Compound 21)

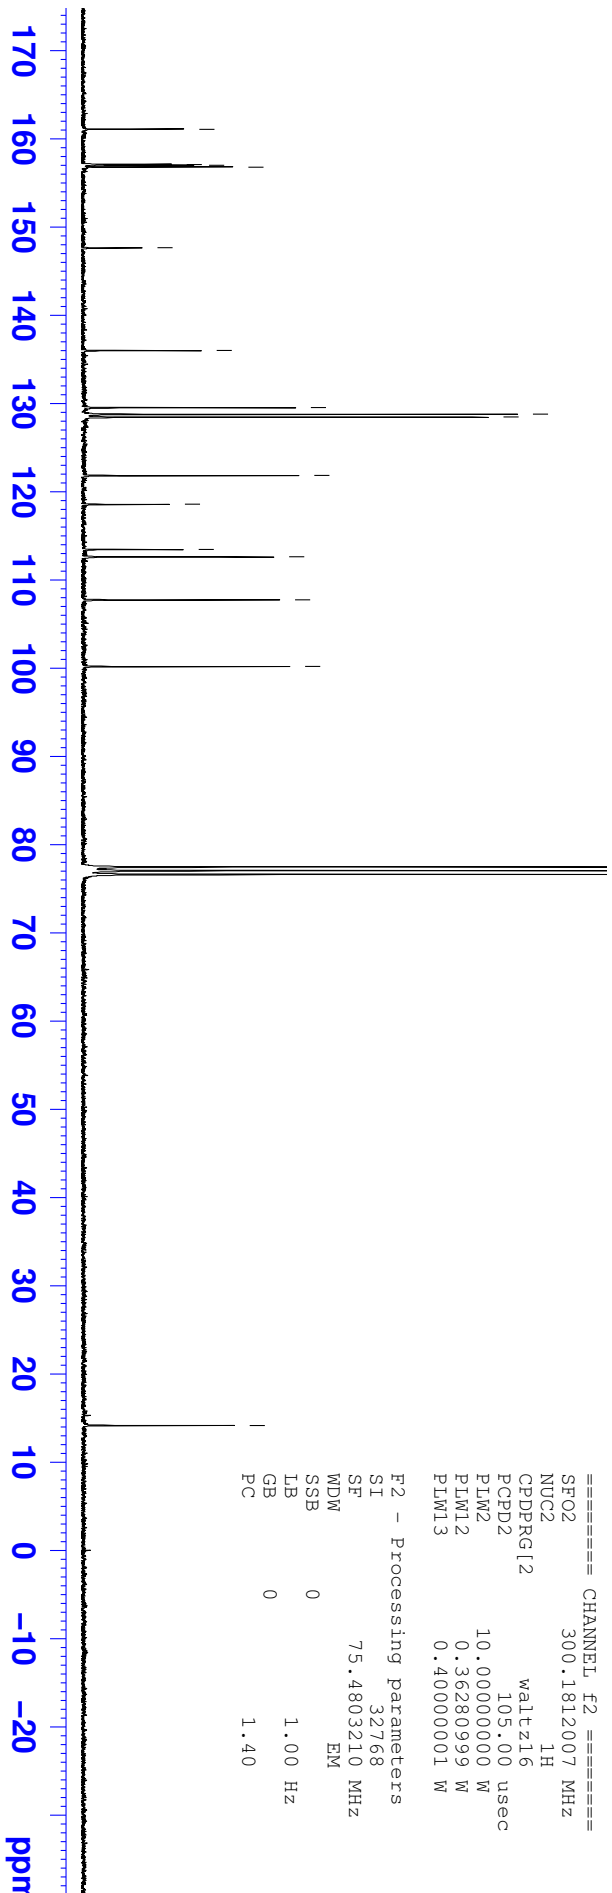

161.08  
 157.09  
 157.01  
 156.79  
 147.67  
 136.02  
 129.55  
 128.80  
 128.48  
 121.85  
 118.60  
 113.46  
 112.64  
 107.75  
 100.21  
 14.16

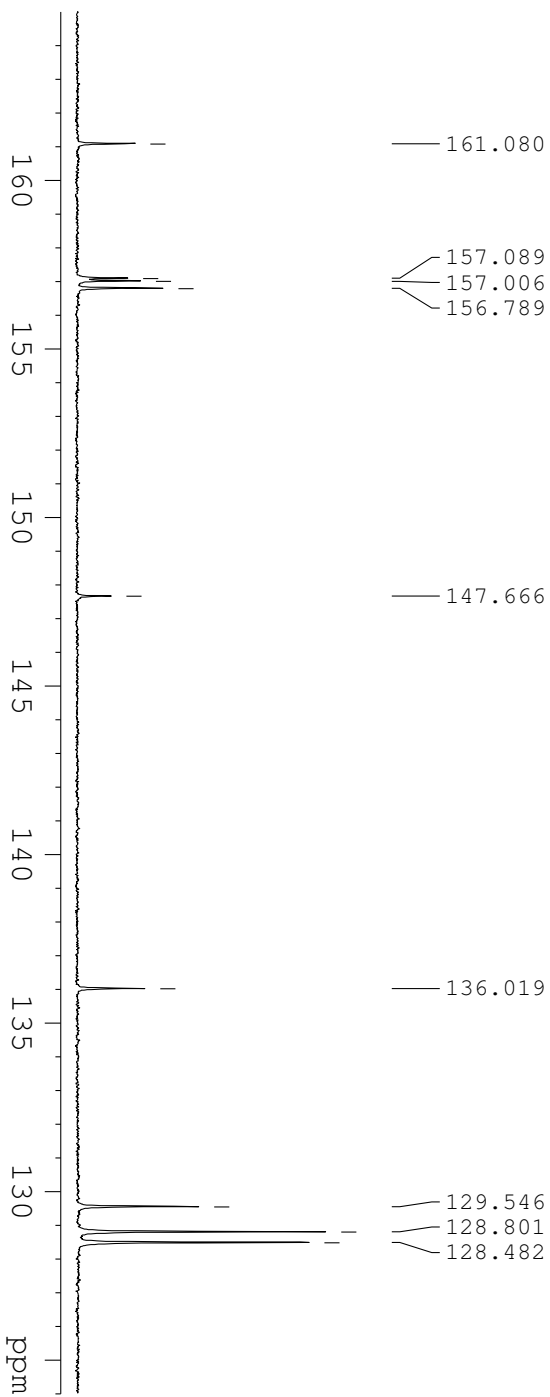

161.080  
 157.089  
 157.006  
 156.789  
 147.666  
 136.019  
 129.546  
 128.801  
 128.482  
 14.16

Current Data Parameters  
 NAME 78Furan-4PC 01  
 EXPNO 2  
 PROCNO 1

F2 - Acquisition Parameters  
 Date\_ 20140502  
 Time 19.26

INSTRUM FOURIER300  
 PROBDH 5 mm DUL 13C-1  
 PULPROG zgpg30  
 TD 65536  
 SOLVENT CDCl3  
 NS 6000  
 DS 4  
 SWH 24414.063 Hz  
 FIDRES 0.372529 Hz  
 AQ 1.3421773 sec  
 RG 501.187  
 DW 20.480 usec  
 DE 6.50 usec  
 TE 295.9 K  
 D1 2.00000000 sec  
 D11 0.03000000 sec  
 D31 0.00001600 sec  
 D40 0.02432300 sec  
 L4 34  
 L5 49  
 P32 105.00 usec  
 TD0 1

==== CHANNEL F1 =====  
 SF01 75.4878687 MHz  
 NUC1 13C  
 P1 16.00 usec  
 PLW1 60.00000000 W

==== CHANNEL F2 =====  
 SF02 300.1812007 MHz  
 NUC2 1H  
 CPDPRG12 waltz16  
 PCPD2 105.00 usec  
 PLW2 10.00000000 W  
 PLW12 0.36280999 W  
 PLW13 0.400000001 W

F2 - Processing parameters  
 SI 32768  
 SF 75.4803210 MHz  
 WDW EM  
 SSB 0  
 LB 1.00 Hz  
 GB 0  
 PC 1.40

78F3M4PC

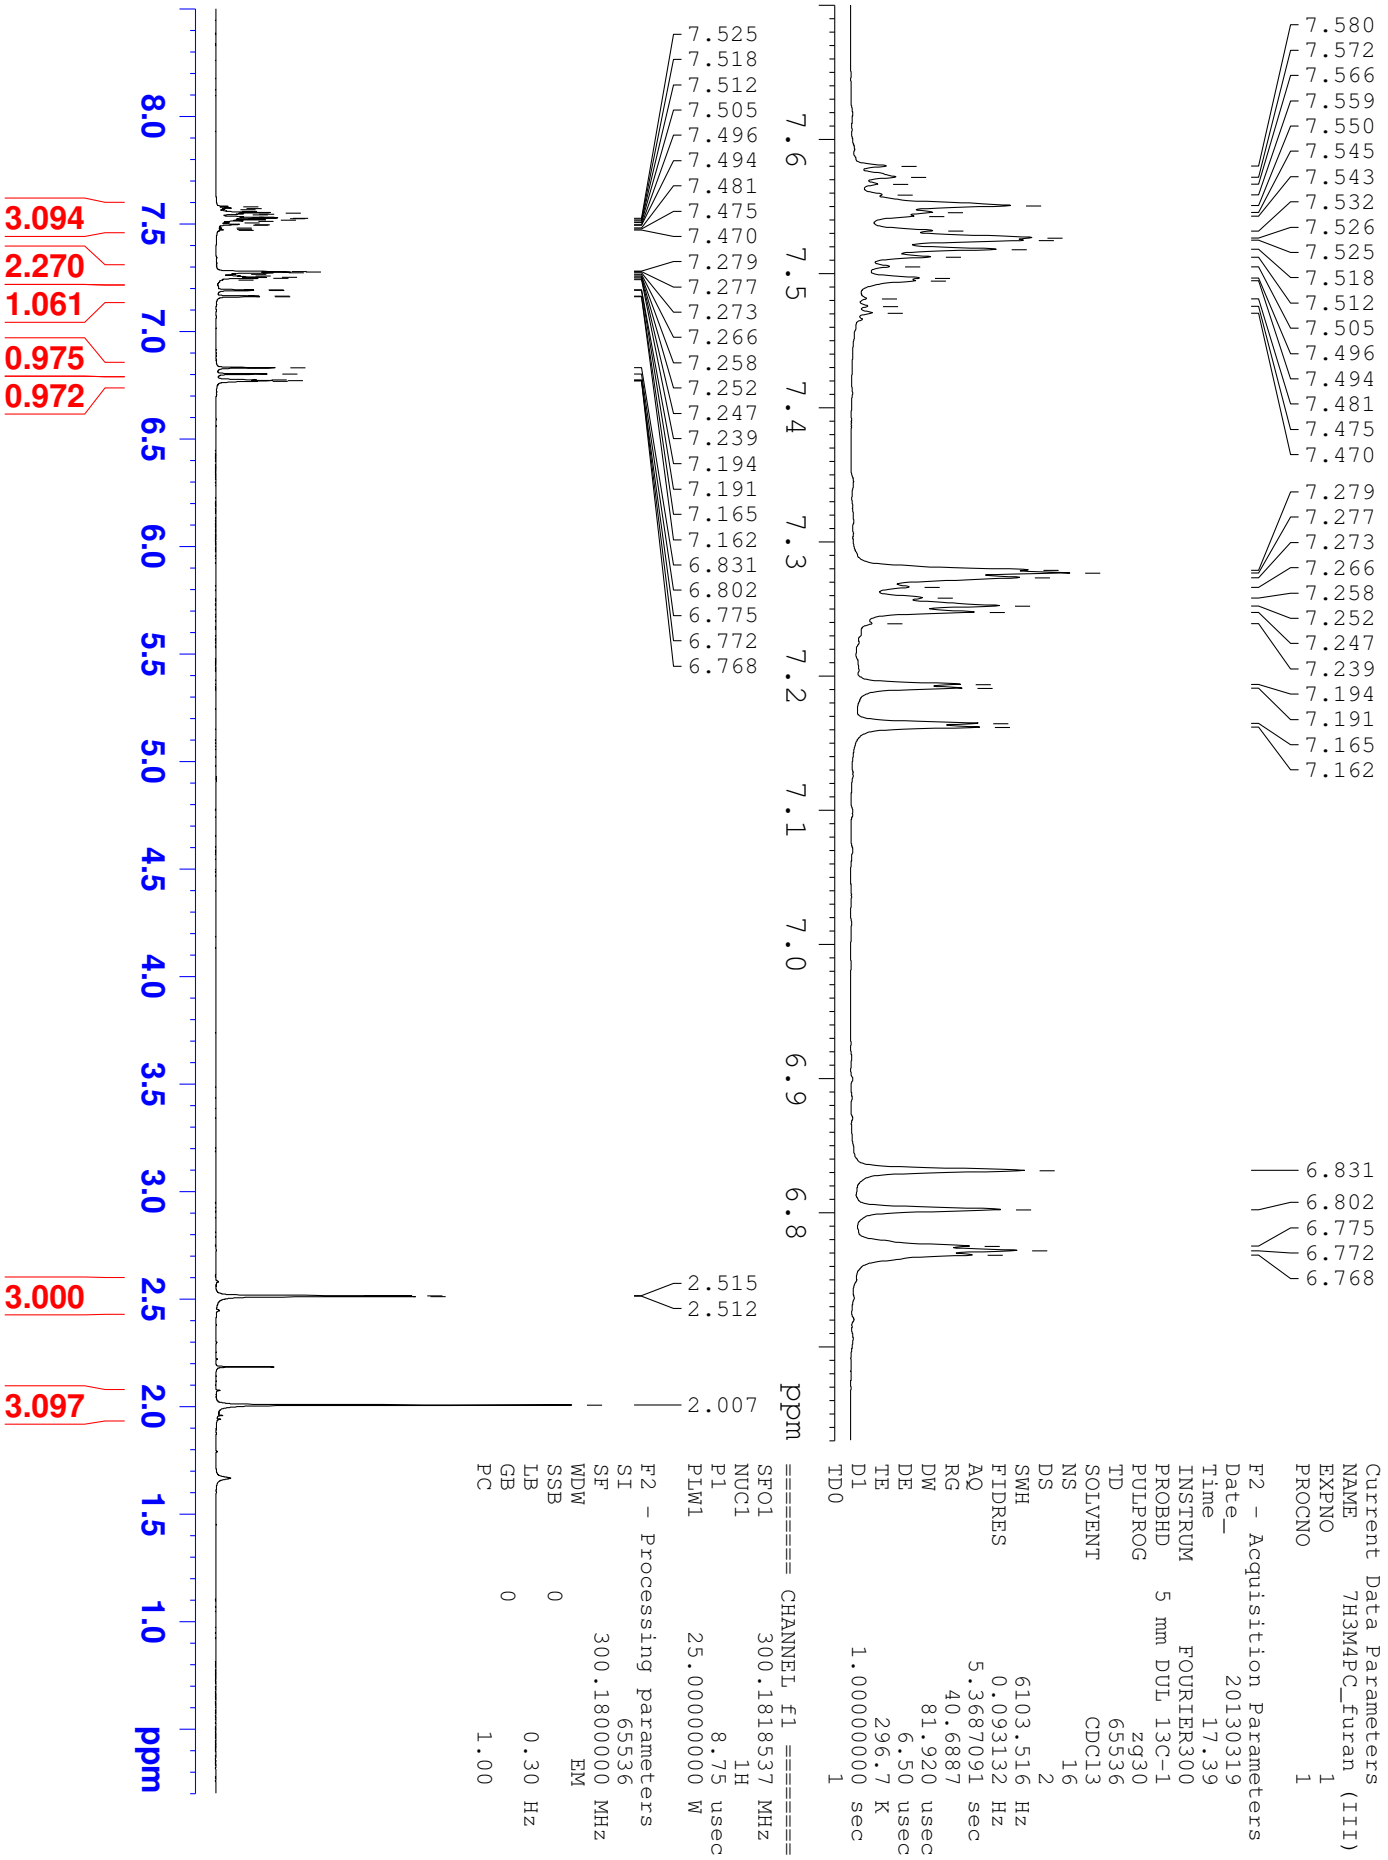

78F3M4PC

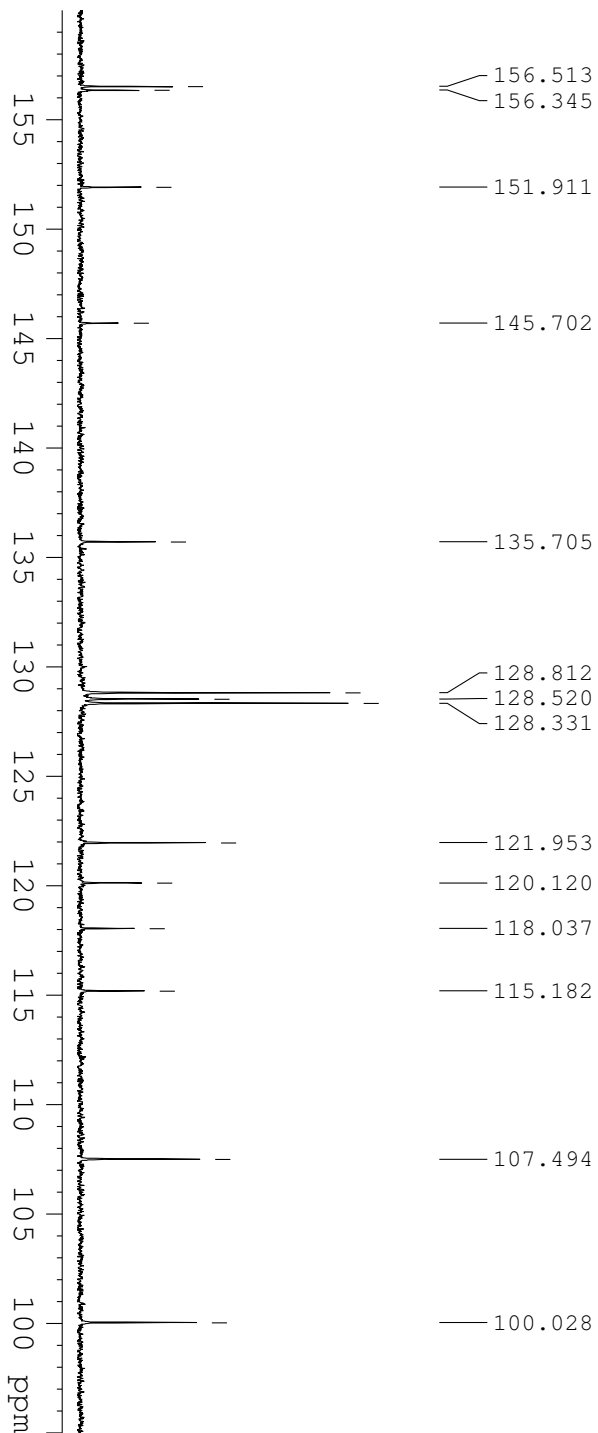

Current Data Parameters  
 NAME 7H3M4PC\_furan (III)  
 EXPNO 2  
 PROCNO 1

F2 - Acquisition Parameters  
 Date\_ 20130319  
 Time 17.52  
 INSTRUM FOURIER300  
 PROBHD 5 mm DUL 13C-1  
 PULPROG zgpg30  
 TD 65536  
 SOLVENT CDCl3  
 NS 1759  
 DS 4  
 SWH 24414.063 Hz  
 FIDRES 0.372529 Hz  
 AQ 1.3421773 sec  
 RG 501.187  
 DW 20.480 usec  
 DE 6.50 usec  
 TE 296.8 K  
 D1 2.00000000 sec  
 D11 0.03000000 sec  
 D31 0.00001600 sec  
 D40 0.02432300 sec  
 L4 34  
 L5 49  
 P32 105.00 usec  
 TD0 1

162.65  
 156.51  
 156.35  
 151.91  
 145.70  
 135.70  
 128.81  
 128.52  
 128.33  
 121.95  
 120.12  
 118.04  
 115.18  
 107.49  
 100.03

99.14  
 97.14  
 94.14

==== CHANNEL F1 =====  
 SFO1 75.4878687 MHz  
 NUC1 13C  
 P1 16.00 usec  
 PLW1 60.00000000 W  
  
 ===== CHANNEL F2 =====  
 SFO2 300.1812007 MHz  
 NUC2 1H  
 CPDPRG12 waltz16  
 PCPD2 105.00 usec  
 PLW2 25.00000000 W  
 PLW12 0.21336000 W  
 PLW13 0.23522000 W  
  
 F2 - Processing parameters  
 SI 32768  
 SF 75.4803210 MHz  
 WDW EM  
 SSB 0  
 LB 1.00 Hz  
 GB 0  
 PC 1.40

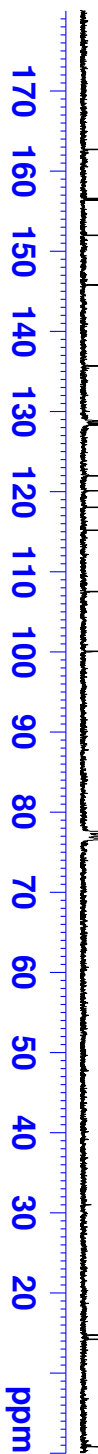

Current Data Parameters  
 NAME 78F4MC  
 EXPNO 1  
 PROCNO 1

7.429  
 7.400  
 7.344  
 7.342  
 7.315  
 7.313

2.498  
 2.496  
 2.476  
 2.473

F2 - Acquisition Parameters  
 Date\_ 20140609  
 Time 10.14  
 INSTRUM FOURIER300  
 PROBD 5 mm DUL 13C-1  
 PULPROG zg30  
 TD 65536  
 SOLVENT CDCl3  
 NS 16  
 DS 2  
 SMH 6103.516 Hz  
 FIDRES 0.093132 Hz  
 AQ 5.3687091 sec  
 RG 54.6209  
 DW 81.920 usec  
 DE 6.50 usec  
 TE 296.5 K  
 D1 1.00000000 sec  
 TD0 1

==== CHANNEL f1 =====  
 SFO1 300.1818537 MHz  
 NUCL1 1H  
 P1 8.75 usec  
 PLWL 25.00000000 W

F2 - Processing parameters  
 SI 65536  
 SF 300.1800050 MHz  
 WDW EM  
 SSB 0  
 LB 0.30 Hz  
 GB 0  
 PC 1.00

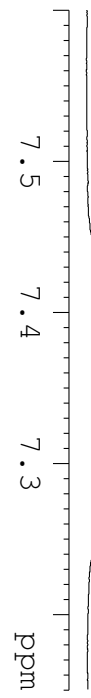

7.429  
 7.400  
 7.344  
 7.342  
 7.315  
 7.313  
 6.713  
 6.236  
 6.232

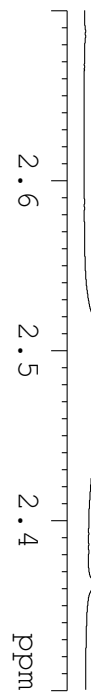

2.498  
 2.496  
 2.476  
 2.473

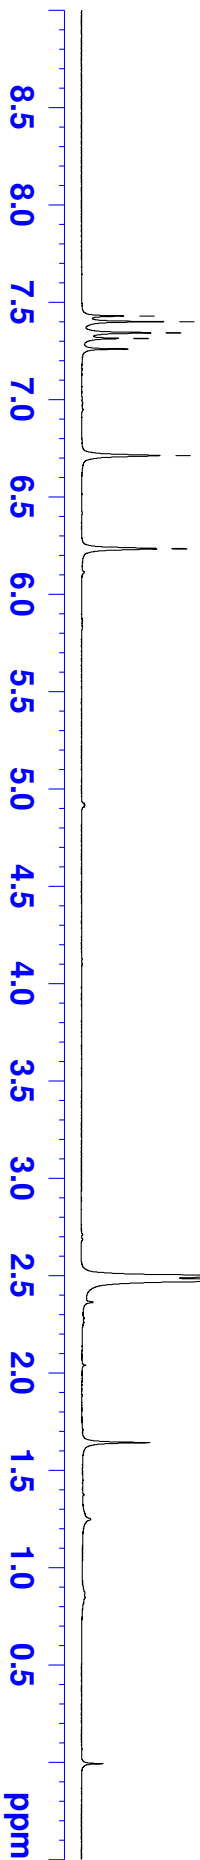

1.98

1.03

1.00

5.99

Current Data Parameters  
 NAME 78F4MC  
 EXPNO 2  
 PROCNO 1

F2 - Acquisition Parameters

Date\_ 20140609  
 Time 17.24  
 INSTRUM FOURIER300  
 PROBD 5 mm DUL 13C-1  
 PULPROG zgpg30  
 TD 65536  
 SOLVENT CDC13  
 NS 10000  
 DS 4  
 SWH 24414.063 Hz  
 FIDRES 0.372529 Hz  
 AQ 1.3421773 sec  
 RG 501.187  
 DW 20.480 usec  
 DE 6.50 usec  
 TE 297.5 K  
 D1 2.00000000 sec  
 D11 0.03000000 sec  
 D31 0.00001600 sec  
 D40 0.02432300 sec  
 L4 34  
 L5 49  
 P32 105.00 usec  
 TD0 1

161.15  
 156.99  
 156.65  
 153.72  
 147.02

119.24  
 118.39  
 114.42  
 112.58  
 107.76  
 100.18

19.40  
 14.13

==== CHANNEL F1 =====  
 SFO1 75.4878687 MHz  
 NUC1 13C  
 P1 16.00 usec  
 PLW1 60.00000000 W

==== CHANNEL F2 =====  
 SFO2 300.1812007 MHz  
 NUC2 1H  
 CPDPRG12 waltz16  
 PCPD2 105.00 usec  
 PLW2 10.00000000 W  
 PLW12 0.36280999 W  
 PLW13 0.40000001 W

F2 - Processing parameters  
 SI 32768  
 SF 75.4803210 MHz  
 WDW EM  
 SSB 0  
 LB 1.00 Hz  
 GB 0  
 PC 1.40

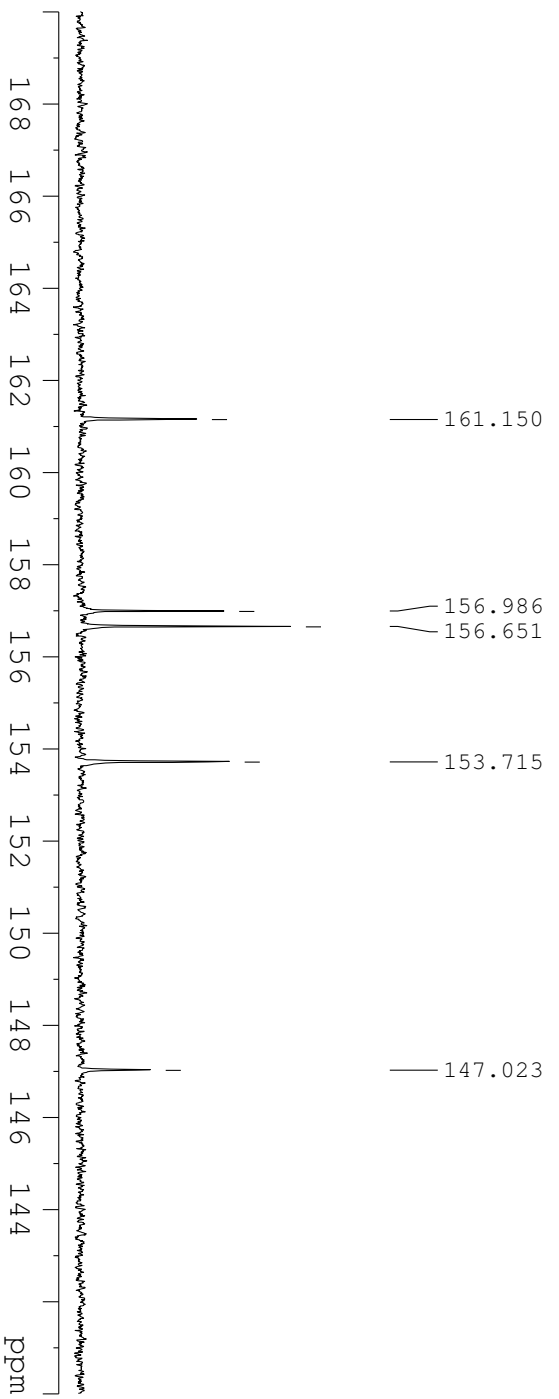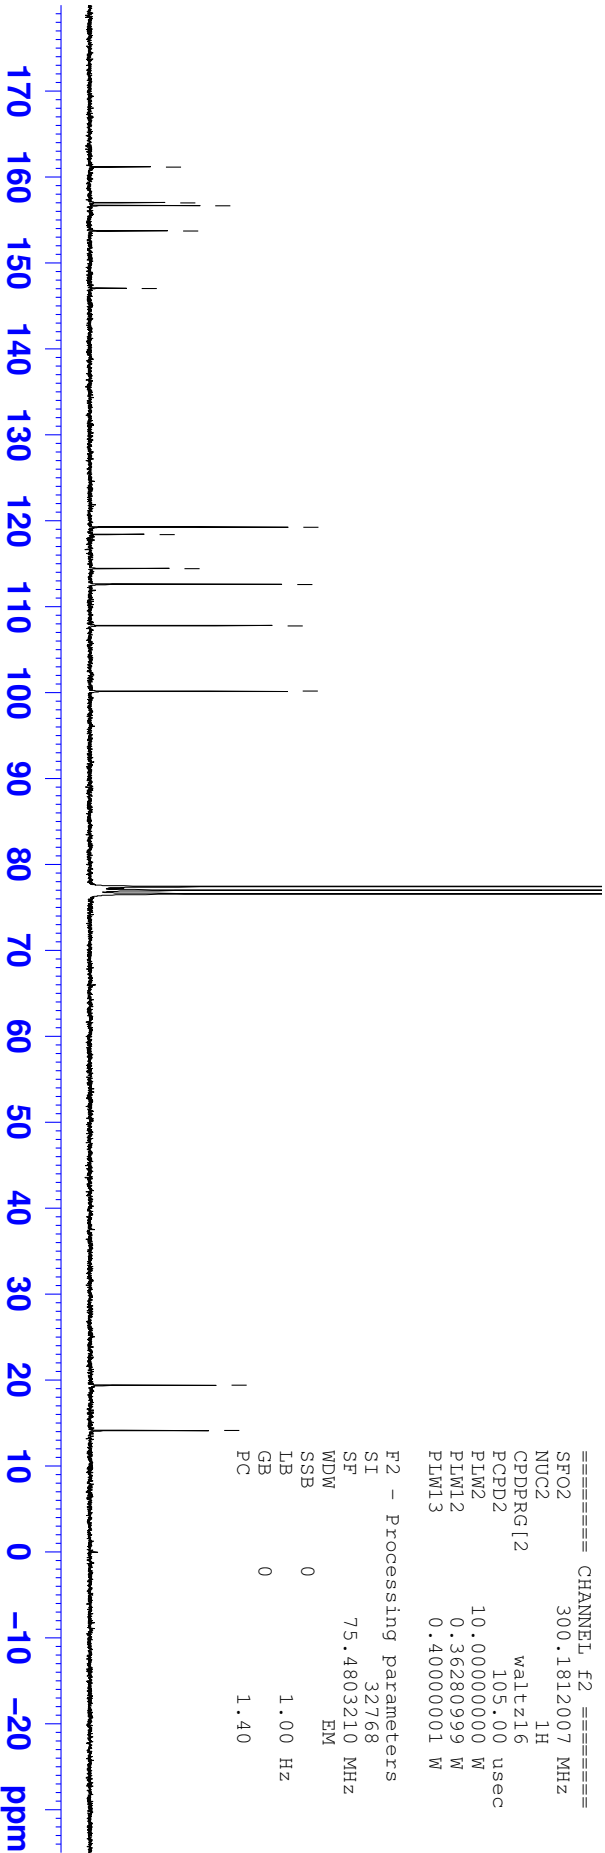

7.579  
7.573  
7.566  
7.560  
7.549  
7.543  
7.537  
7.531  
7.423  
7.421  
7.394  
7.391

6.745  
6.742  
6.738

7.579  
7.573  
7.566  
7.560  
7.549  
7.543  
7.537  
7.531  
7.423  
7.421  
7.394  
7.391  
6.745  
6.742  
6.738

2.527  
2.524

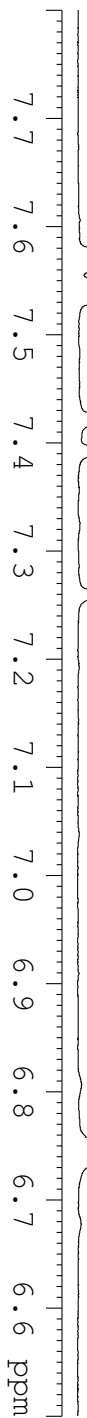

```

Current Data Parameters
NAME      78F4TFC
EXPNO    6
PROCNO   1

F2 - Acquisition Parameters
Date_    20140527
Time     10.17
INSTRUM  PULPROG
PROBHD   5 mm DUL 13C-1
PULPROG  zg30
TD        65536
SOLVENT  CDCl3
NS        16
DS        2
SWH       6103.516 Hz
FIDRES    0.093132 Hz
AQ        5.3687091 sec
RG        112.187
DE        81.920 usec
DM        6.50 usec
TE        296.5 K
D1        1.00000000 sec
IDU       1

===== CHANNEL f1 =====
SFO1     300.1818537 MHz
NUC1     13C
P1        8.15 usec
PL1       0.00000000 W
F2 - Processing parameters
SI        300.1800050 MHz
SF        300.1800050 MHz
WDW       EM
SSB       0
LB        0.30 Hz
GB        0
PC        1.00
    
```

0.96  
0.94

1.95

3.00

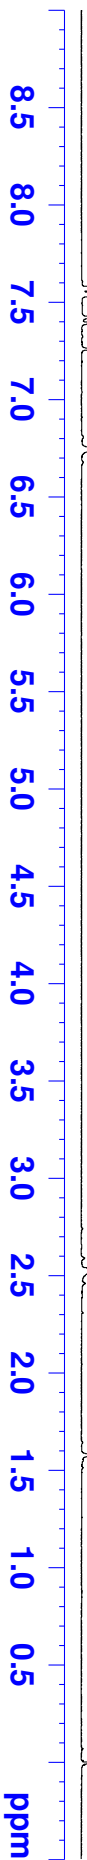



Current Data Parameters  
 NAME 78F4TFC  
 EXPNO 9  
 PROCNO 1

F2 - Acquisition Parameters  
 Date\_ 20140607  
 Time 18.01

INSTRUM FOURIER300  
 PROBD 5 mm DUL 13C-1  
 PULPROG zgpg30  
 TD 65536  
 SOLVENT CDC13  
 NS 35000  
 DS 4

SWH 24414.063 Hz  
 FIDRES 0.372529 Hz  
 AQ 1.3421773 sec  
 RG 501.187  
 DW 20.480 usec  
 DE 6.50 usec  
 TE 296.2 K

D1 2.00000000 sec  
 D11 0.03000000 sec  
 D31 0.00001600 sec  
 D40 0.02432300 sec  
 L4 34  
 L5 49  
 P32 105.00 usec  
 TD0 1

==== CHANNEL F1 =====  
 SF01 75.4878687 MHz  
 NUC1 13C  
 P1 16.00 usec  
 PLW1 60.00000000 W

==== CHANNEL F2 =====  
 SF02 300.1812007 MHz  
 NUC2 1H  
 CPDPRG12 waltz16  
 PCPD2 105.00 usec  
 PLW2 10.00000000 W  
 PLW12 0.36280999 W  
 PLW13 0.40000001 W

F2 - Processing parameters  
 SI 32768  
 SF 75.4803210 MHz  
 WDW EM  
 SSB 0  
 LB 1.00 Hz  
 GB 0  
 PC 1.40

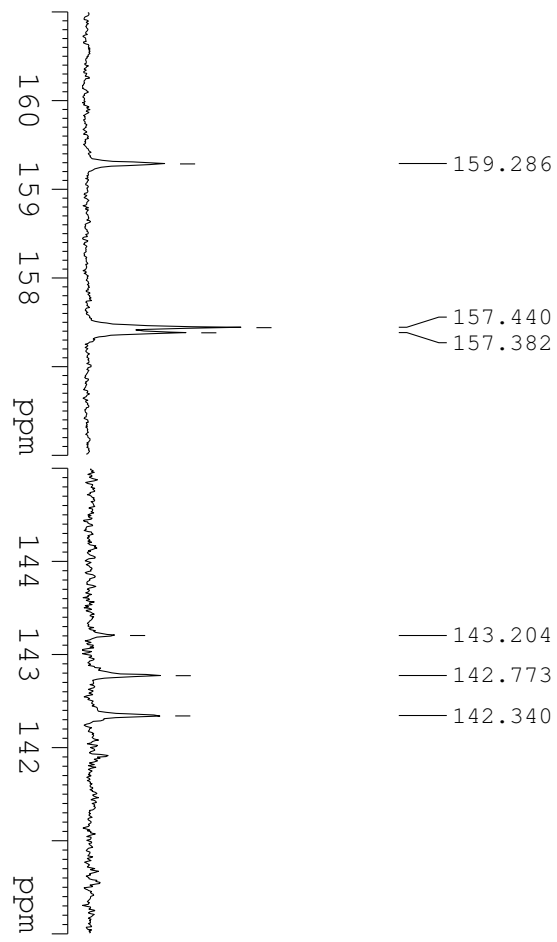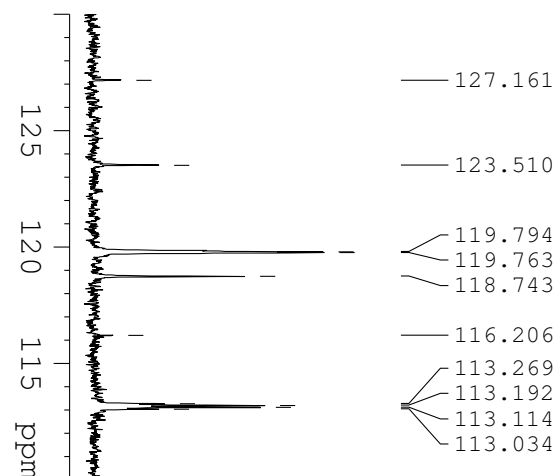

- 159.29
- 157.44
- 157.38
- 148.04
- 143.20
- 142.77
- 142.34
- 127.16
- 123.51
- 119.79
- 119.76
- 118.74
- 116.21
- 113.27
- 113.19
- 113.11
- 113.03
- 108.84
- 108.05
- 100.05

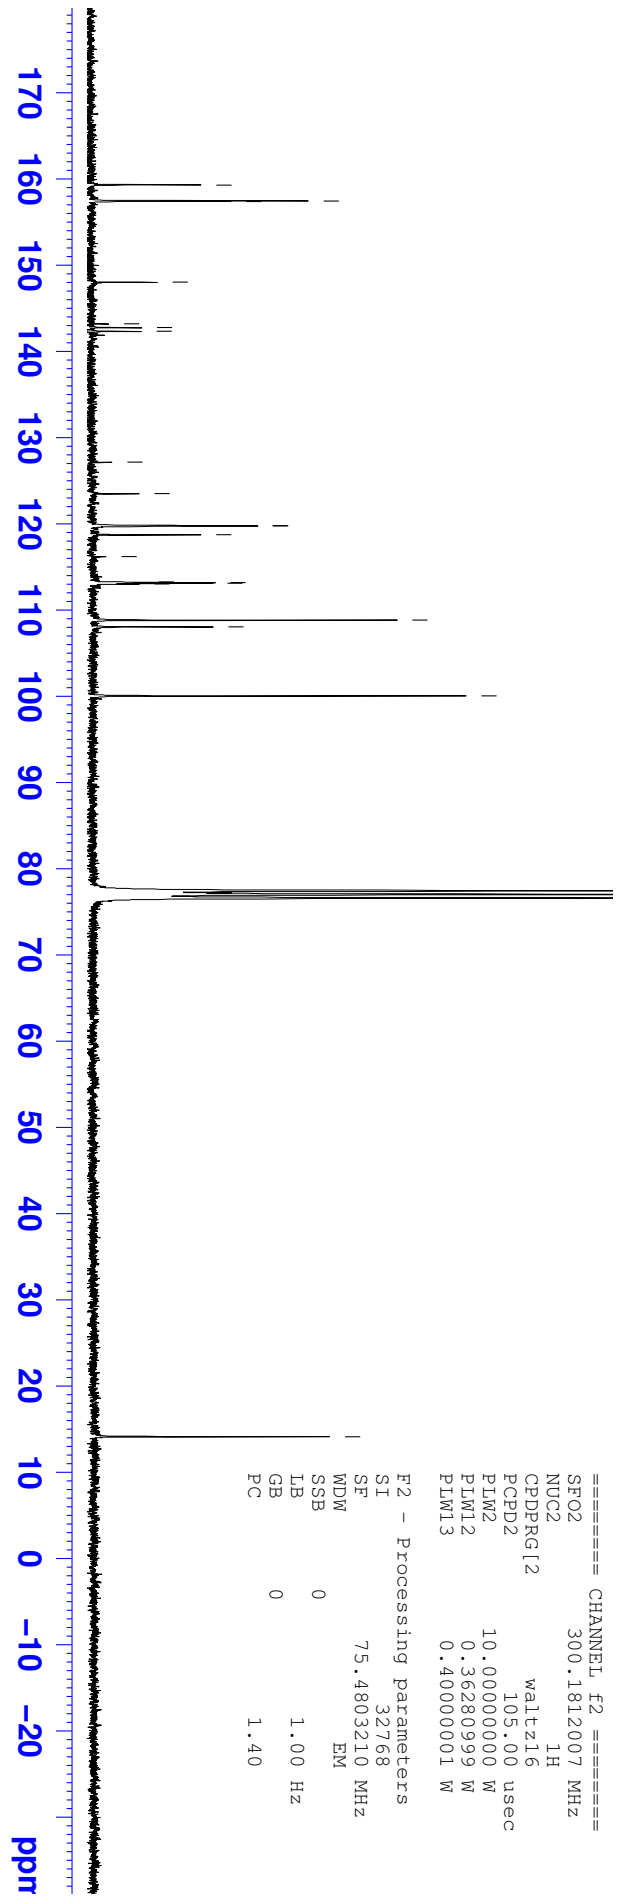

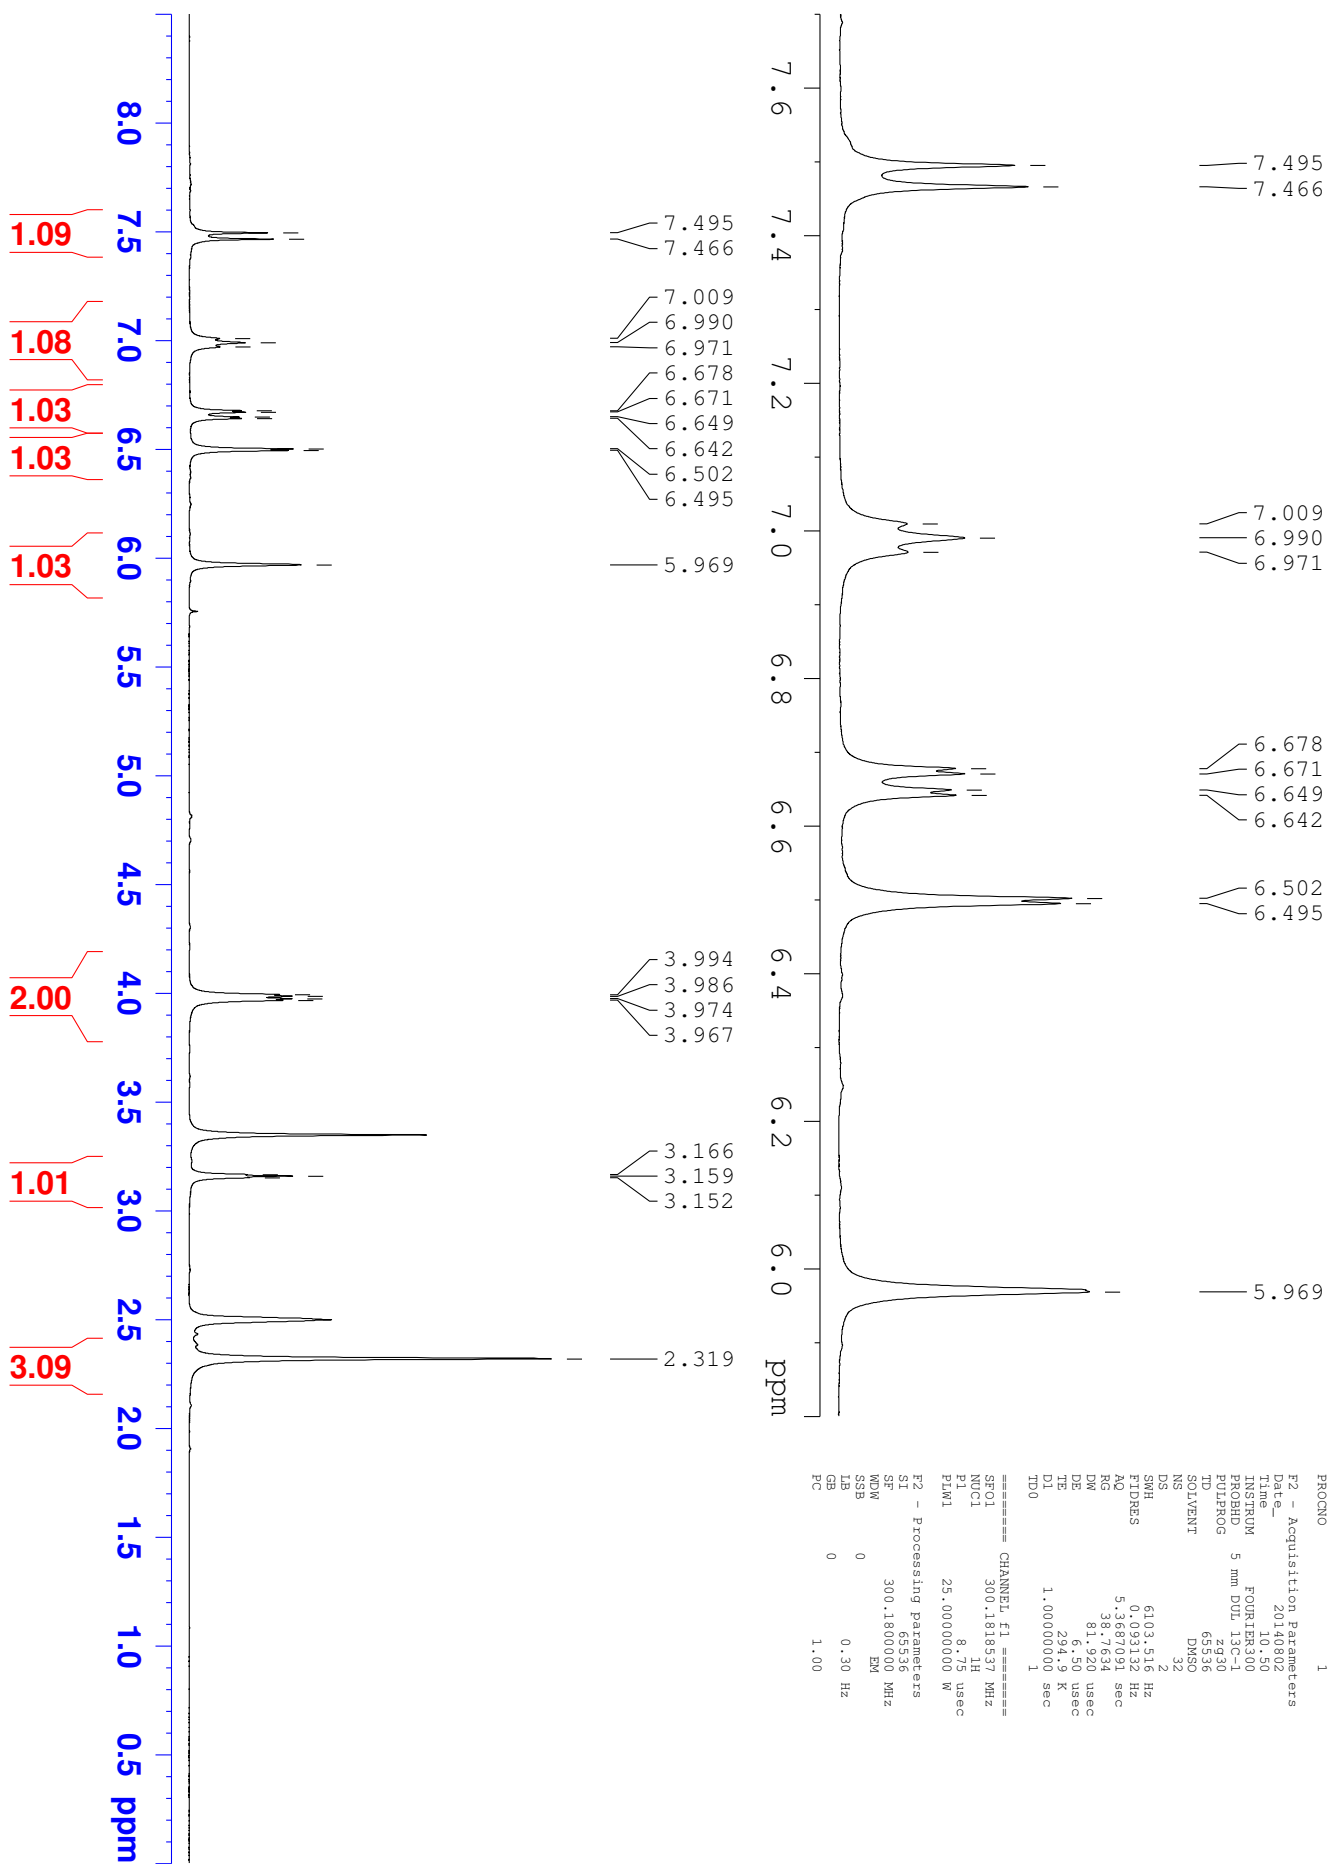

Current Data Parameters  
 NAME N-Propargyl-7-amino-4-r  
 EXPNO 2  
 PROCNO 1

161.07  
 155.78  
 154.20  
 151.89

126.41

111.15  
 110.00  
 108.68

97.88

81.60

74.03

32.19

18.50

F2 - Acquisition Parameters

Date\_ 20140802  
 Time 11.00  
 INSTRUM FOURIER300  
 PROBD 5 mm DUL 13C-1  
 PULPROG zgpg30  
 TD 65536  
 SOLVENT DMSO  
 NS 10592  
 DS 4  
 SWH 24414.063 Hz  
 FIDRES 0.372529 Hz  
 AQ 1.3421773 sec  
 RG 501.187  
 DW 20.480 usec  
 DE 6.50 usec  
 TE 295.2 K  
 D1 2.00000000 sec  
 D11 0.03000000 sec  
 D31 0.00001600 sec  
 D40 0.02432300 sec  
 L4 34  
 L5 49  
 P32 105.00 usec  
 TD0 1

CHANNEL F1

SFO1 75.4878687 MHz  
 NUC1 13C  
 P1 16.00 usec  
 PLW1 60.00000000 W

CHANNEL F2

SFO2 300.1812007 MHz  
 NUC2 1H  
 CPDPRG12 waltz16  
 PCPD2 105.00 usec  
 PLW2 10.00000000 W  
 PLW12 0.36280999 W  
 PLW13 0.40000001 W

F2 - Processing parameters

SI 32768  
 SF 75.4803210 MHz  
 WDW EM  
 SSB 0  
 LB 1.00 Hz  
 GB 0  
 PC 1.40

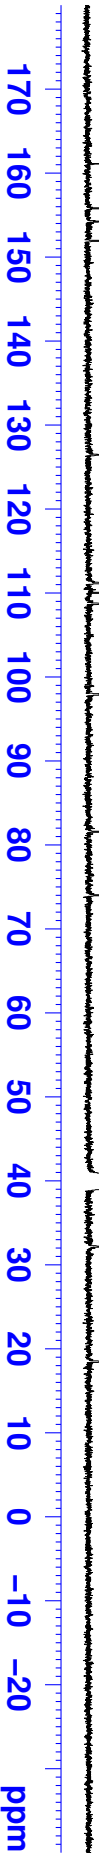

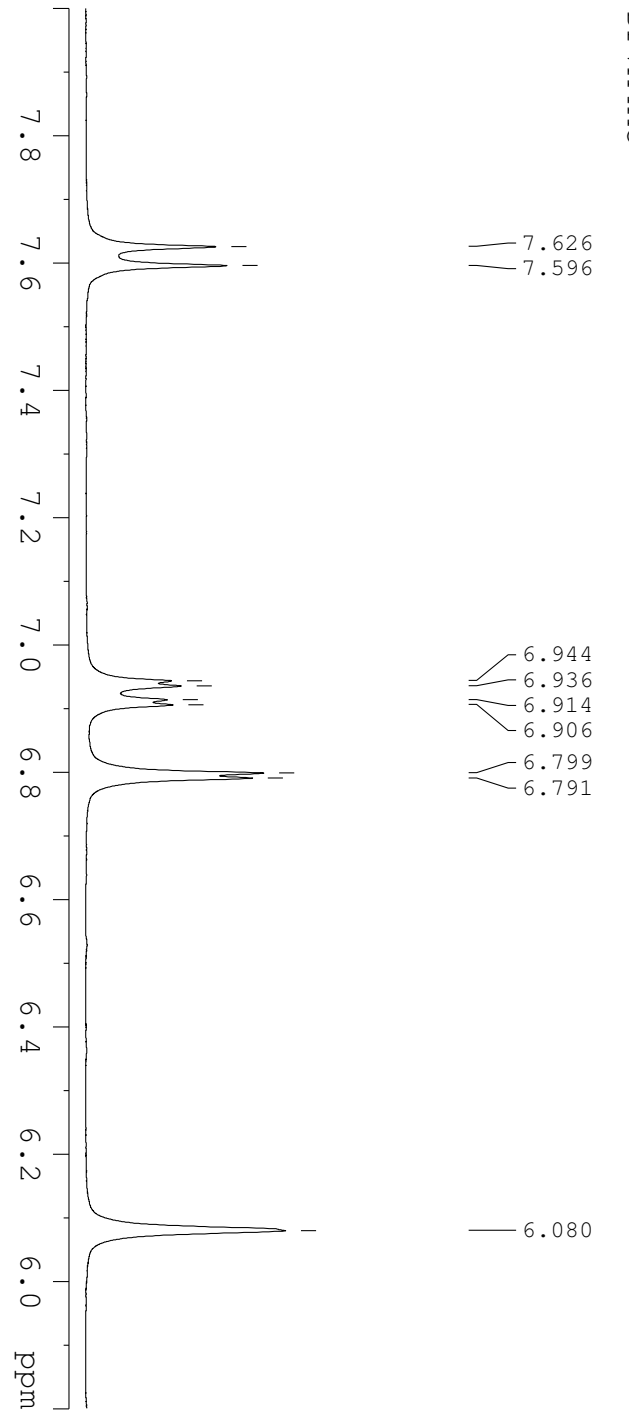

Current Data Parameters  
 NAME N,N-Dipropargyl-7-amino-4-methylcoumarin  
 EXPNO 3  
 PROCNO 1  
 F2 - Acquisition Parameters  
 Date\_ 20140801  
 Time 18.32  
 INSTRUM FOURIER300  
 PROBD 5 mm DUL 13C-1  
 PULPROG zgpg30  
 TD 65536  
 SFO 125.760  
 SOLVENT DMSO  
 NS 32  
 DS 2  
 SWH 6103.516 Hz  
 FWHM 0.402116 Hz  
 AQ 5.3687091 sec  
 RG 30.5672  
 DW 81.920 usec  
 DE 6.50 usec  
 TE 295.2 K  
 D1 1.0000000 sec  
 TDO 1

CHANNEL f1  
 SFO1 300.1818537 MHz  
 PULPROG zgpg30  
 TD 65536  
 SFO 125.7600000 MHz  
 P1 8.75 usec  
 P1M1 25.00000000 W

F2 - Processing parameters  
 SI 65536  
 SF 300.180000 MHz  
 WDW EM  
 SSB 0  
 LB 0.30 Hz  
 GB 0  
 PC 1.00

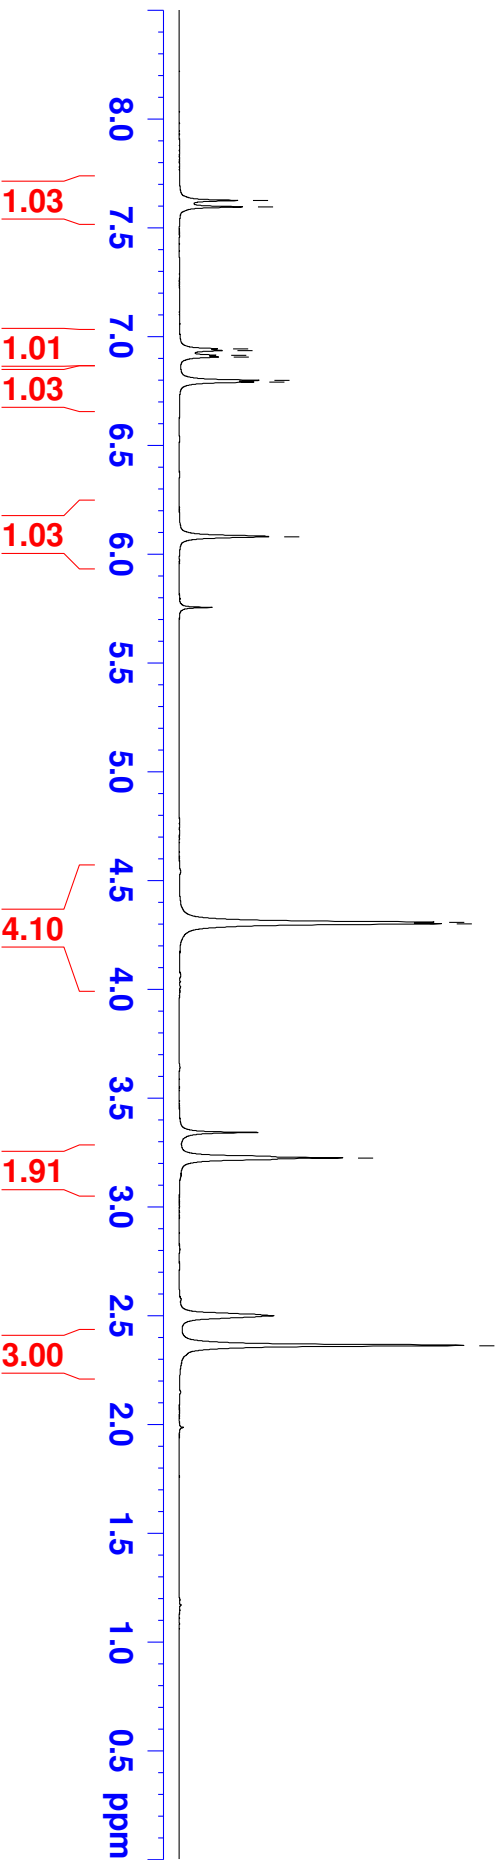

Current Data Parameters  
 NAME N,N-Dipropargyl-7-aminic  
 EXPNO 2  
 PROCNO 1

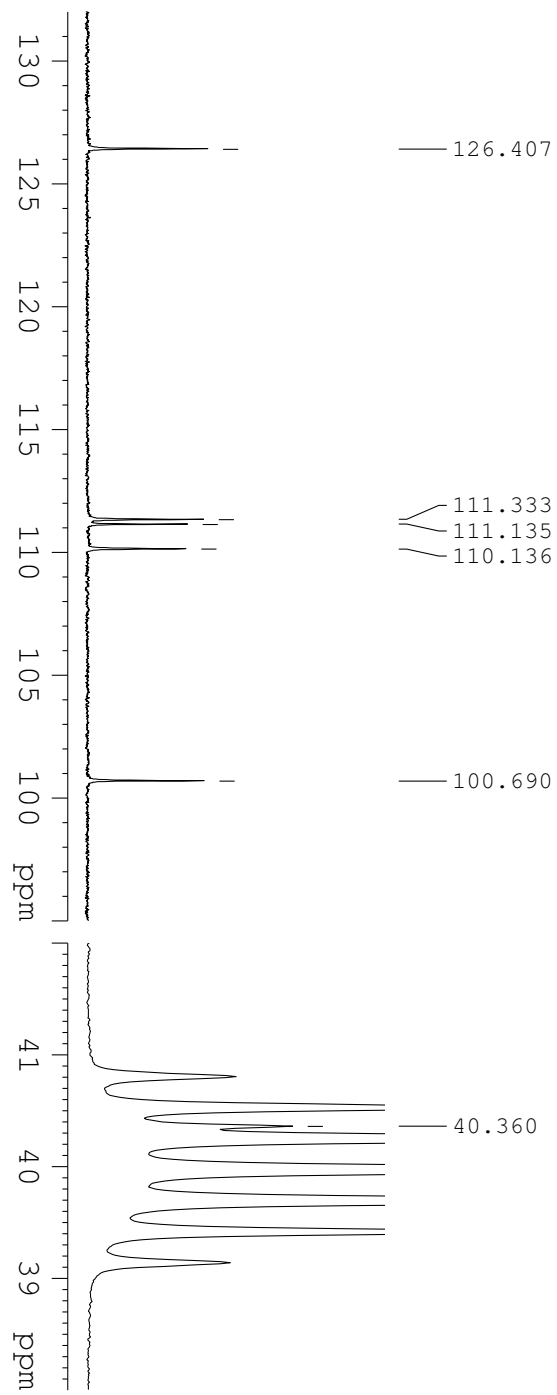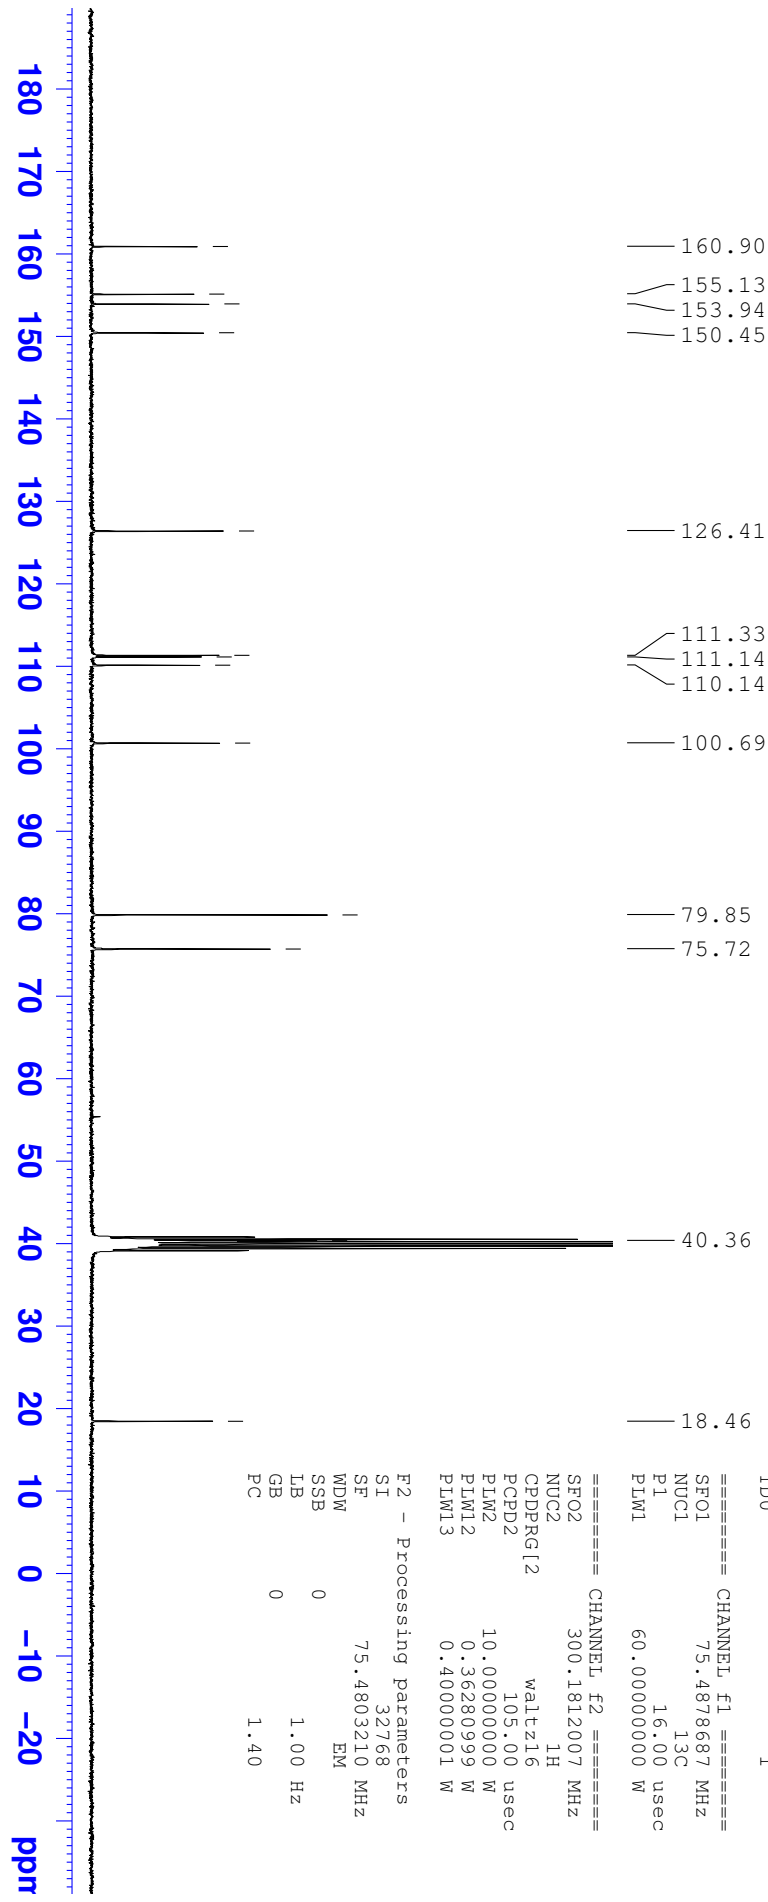

F2 - Acquisition Parameters

Date\_ 20140801  
 Time 18.41  
 INSTRUM FOURIER300  
 PROBDH 5 mm DUL 13C-1  
 PULPROG zgpg30  
 TD 65536  
 SOLVENT DMSO  
 NS 12000  
 DS 4  
 SWH 24414.063 Hz  
 FIDRES 0.372529 Hz  
 AQ 1.3421773 sec  
 RG 501.187  
 DW 20.480 usec  
 DE 6.50 usec  
 TE 295.7 K  
 D1 2.00000000 sec  
 D11 0.03000000 sec  
 D31 0.00001600 sec  
 D40 0.02432300 sec  
 L4 34  
 L5 49  
 P32 105.00 usec  
 TD0 1

CHANNEL F1

SFO1 75.4878687 MHz  
 NUC1 13C  
 P1 16.00 usec  
 PLW1 60.00000000 W

CHANNEL F2

SFO2 300.1812007 MHz  
 NUC2 1H  
 CPDPRG12 waltz16  
 PCPD2 105.00 usec  
 PLW2 10.00000000 W  
 PLW12 0.36280999 W  
 PLW13 0.40000001 W

F2 - Processing parameters

SI 32768  
 SF 75.4803210 MHz  
 WDW EM  
 SSB 0  
 LB 1.00 Hz  
 GB 0  
 PC 1.40

78Py4MC

Current Data Parameters  
 NAME 78-Pyridino-4-methylcoumarin  
 EXPNO 3  
 PROCNO 1

F2 - Acquisition Parameters  
 Date\_ 20140802  
 Time\_ 21.42

INSTRUM FOURIER300  
 PROBD 5 mm DUL 13C-1  
 PULPROG zg30  
 TD 65536  
 SOLVENT DMSO  
 NS 32

DS 2  
 SMH 6103.516 Hz  
 FIDRES 0.093132 Hz  
 AO 5.3687091 sec  
 RG 91.0222

DW 81.920 usec  
 DE 6.50 usec  
 TE 295.6 K  
 D1 1.00000000 sec  
 TD0 1

===== CHANNEL f1 =====  
 SFOL 300.1818537 MHz  
 NUCL1 1H  
 P1 8.75 usec  
 PLWL 25.00000000 W

F2 - Processing parameters  
 SI 65536  
 SF 300.1800000 MHz  
 MDM 0  
 SSB 0  
 LB 0.30 Hz  
 GB 0  
 PC 1.00

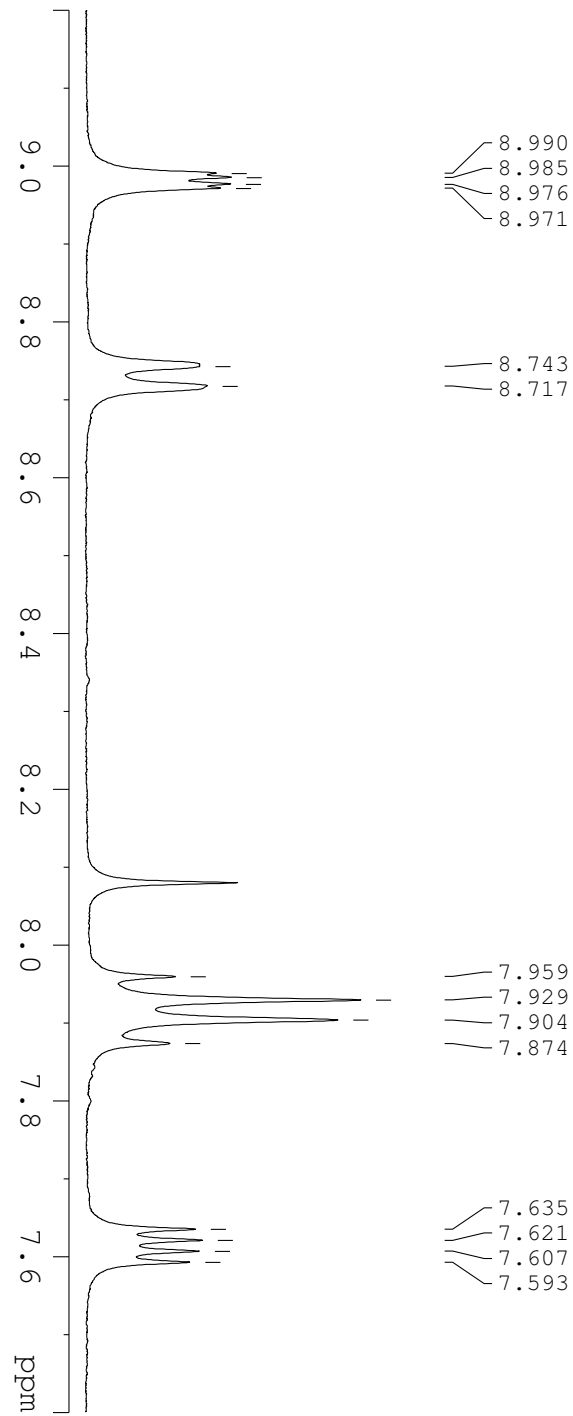

4M78PyC (Compound 27)

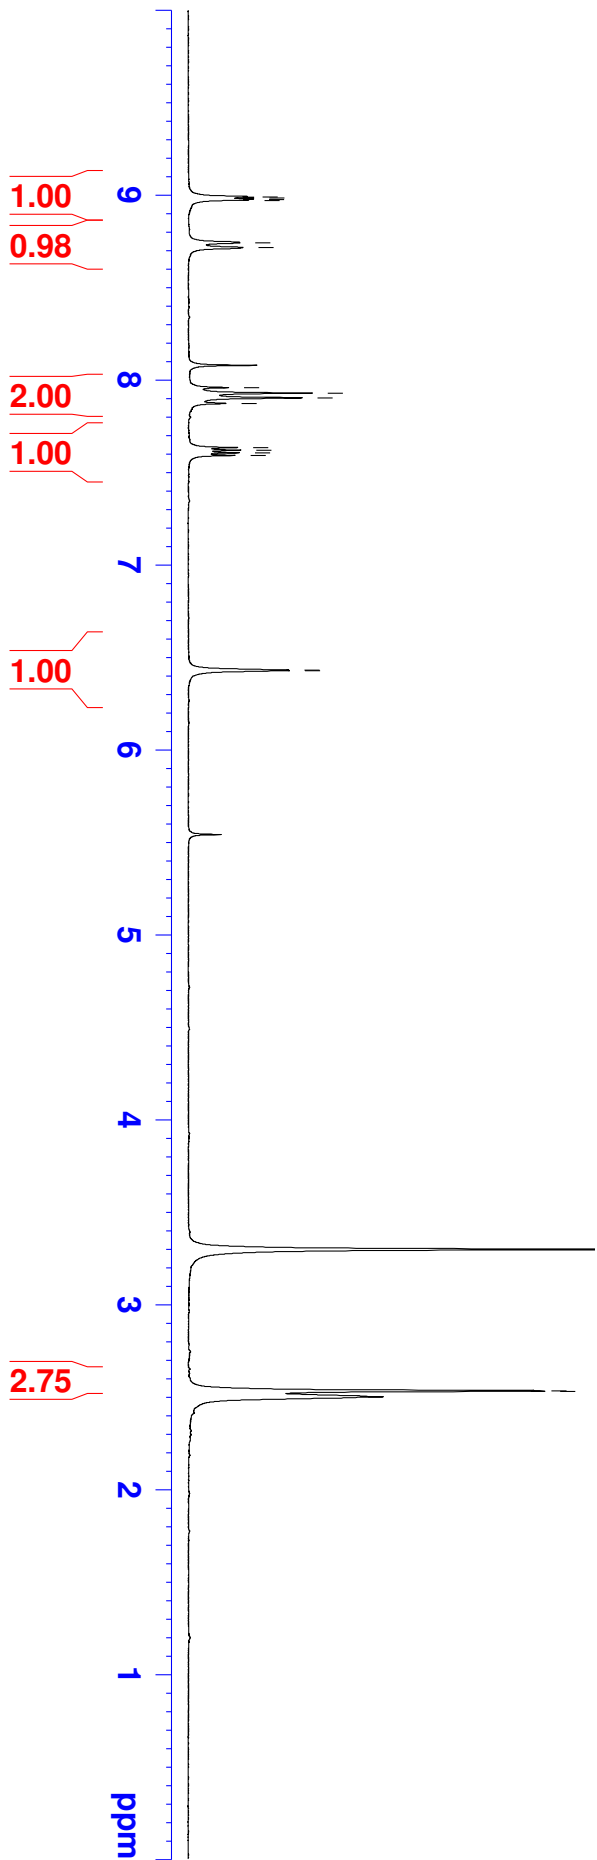

Current Data Parameters  
 NAME 78-PyrIdino-4-methylcol  
 EXPNO 2  
 PROCNO 1

F2 - Acquisition Parameters

Date\_ 20140802  
 Time 21.53  
 INSTRUM FOURIER300  
 PROBD 5 mm DUL 13C-1  
 PULPROG zgpg30  
 TD 65536  
 SOLVENT DMSO  
 NS 17631  
 DS 4  
 SWH 24414.063 Hz  
 FIDRES 0.372529 Hz  
 AQ 1.3421773 sec  
 RG 501.187  
 DW 20.480 usec  
 DE 6.50 usec  
 TE 296.0 K  
 D1 2.00000000 sec  
 D11 0.03000000 sec  
 D31 0.00001600 sec  
 D40 0.02432300 sec  
 L4 34  
 L5 49  
 P32 105.00 usec  
 TD0 1

==== CHANNEL F1 =====

SFO1 75.4878687 MHz  
 NUC1 13C  
 P1 16.00 usec  
 PLW1 60.00000000 W  
 ===== CHANNEL F2 =====  
 SFO2 300.1812007 MHz  
 NUC2 1H  
 CPDPRG12 waltz16  
 PCPD2 105.00 usec  
 PLW2 10.00000000 W  
 PLW12 0.36280999 W  
 PLW13 0.40000001 W

F2 - Processing parameters

SI 32768  
 SF 75.4803210 MHz  
 WDW EM  
 SSB 0  
 LB 1.00 Hz  
 GB 0  
 PC 1.40

- 159.76
- 153.76
- 152.61
- 149.79
- 149.09
- 130.67
- 125.40
- 124.70
- 122.45
- 118.33
- 115.78
- 114.83
- 19.19

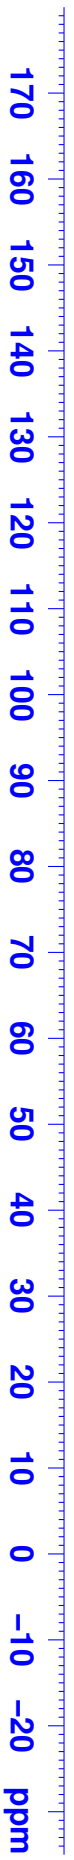

78DO4PC

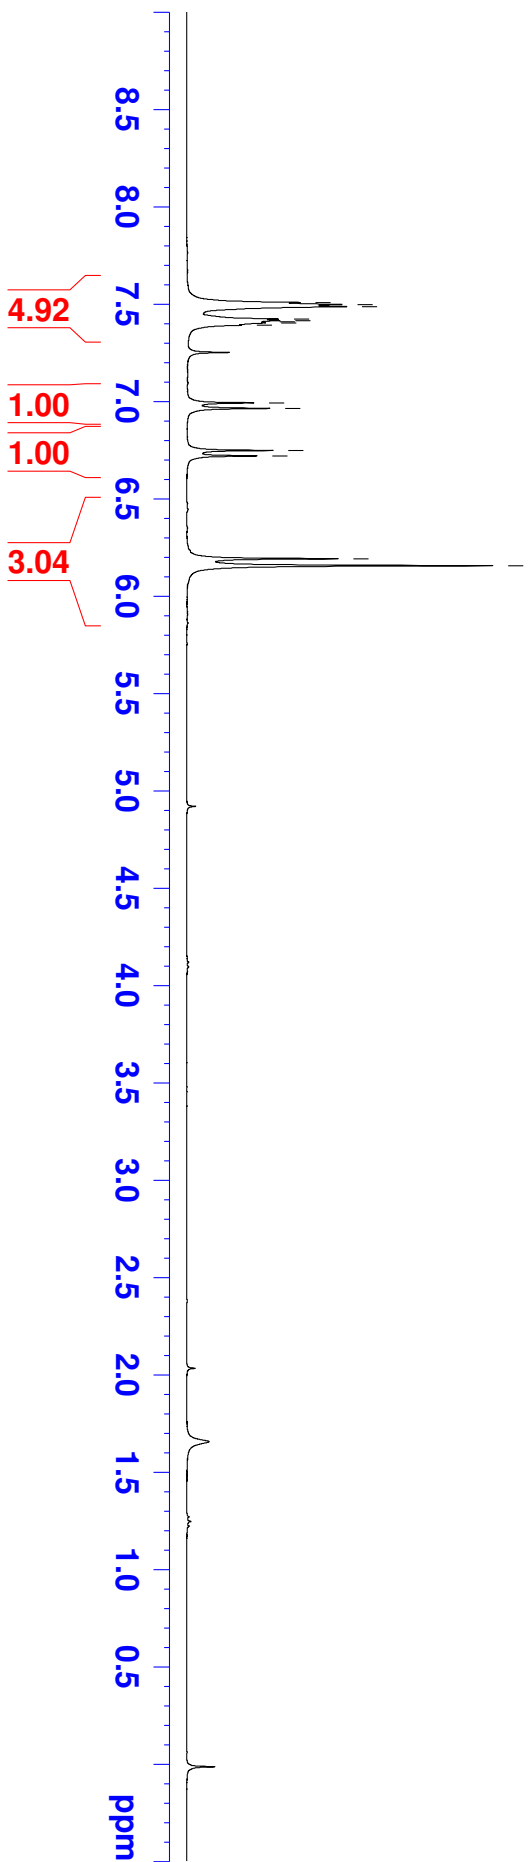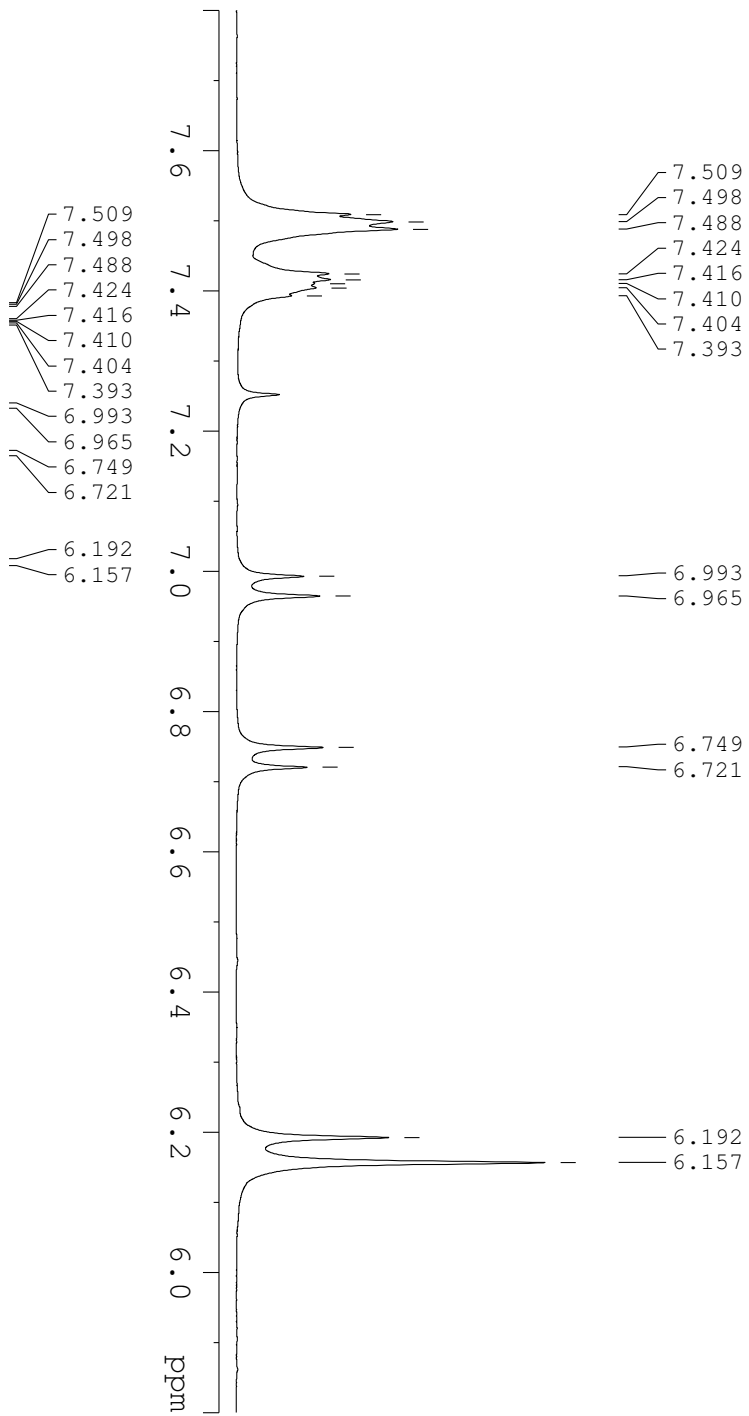

```

Current Data Parameters
NAME          78DO4PC
EXPNO        1
PROCNO       1
F2 - Acquisition Parameters
Date_        20140529
Time         10:01
INSTRUM     FOURIER300
PROBHD      5 mm DUL 13C-1
PULPROG     zg30
TD           65536
SOLVENT     CDCl3
NS           16
DS           2
SWH          6103.516 Hz
FIDRES       0.093132 Hz
AQ           5.3687091 sec
RG           32
DW           81.920 usec
DE           6.50 usec
TE           295.8 K
D1           1.00000000 sec
TD0          1

===== CHANNEL f1 =====
SFO1        300.1818537 MHz
NUC1         1H
P1           8.75 usec
PLM1        25.00000000 W

F2 - Processing parameters
SI           65536
SF           300.1800072 MHz
WDW          EM
SSB          0
GB           0
PC           1.00
    
```



Current Data Parameters  
 NAME 78DO4PC  
 EXPNO 2  
 PROCNO 1

F2 - Acquisition Parameters  
 Date\_ 20140529  
 Time 10.09

INSTRUM FOURIER300  
 PROBD 5 mm DUL 13C-1  
 PULPROG zgpg30  
 TD 65536  
 SOLVENT CDC13  
 NS 2000  
 DS 4

SFH 24414.063 Hz  
 FIDRES 0.372529 Hz  
 AQ 1.3421773 sec  
 RG 501.187  
 DW 20.480 usec  
 DE 6.50 usec  
 TE 296.1 K

D1 2.00000000 sec  
 D11 0.03000000 sec  
 D31 0.00001600 sec  
 D40 0.02432300 sec  
 L4 34  
 L5 49  
 P32 105.00 usec  
 TD0 1

==== CHANNEL F1 =====  
 SF01 75.4878687 MHz  
 NUC1 13C  
 P1 16.00 usec  
 PLW1 60.00000000 W

==== CHANNEL F2 =====  
 SF02 300.1812007 MHz  
 NUC2 1H  
 CPDPRG12 waltz16  
 PCPD2 105.00 usec  
 PLW2 10.00000000 W  
 PLW12 0.36280999 W  
 PLW13 0.400000001 W

F2 - Processing parameters  
 SI 32768  
 SF 75.4803210 MHz  
 WDW EM  
 SSB 0  
 LB 1.00 Hz  
 GB 0  
 PC 1.40

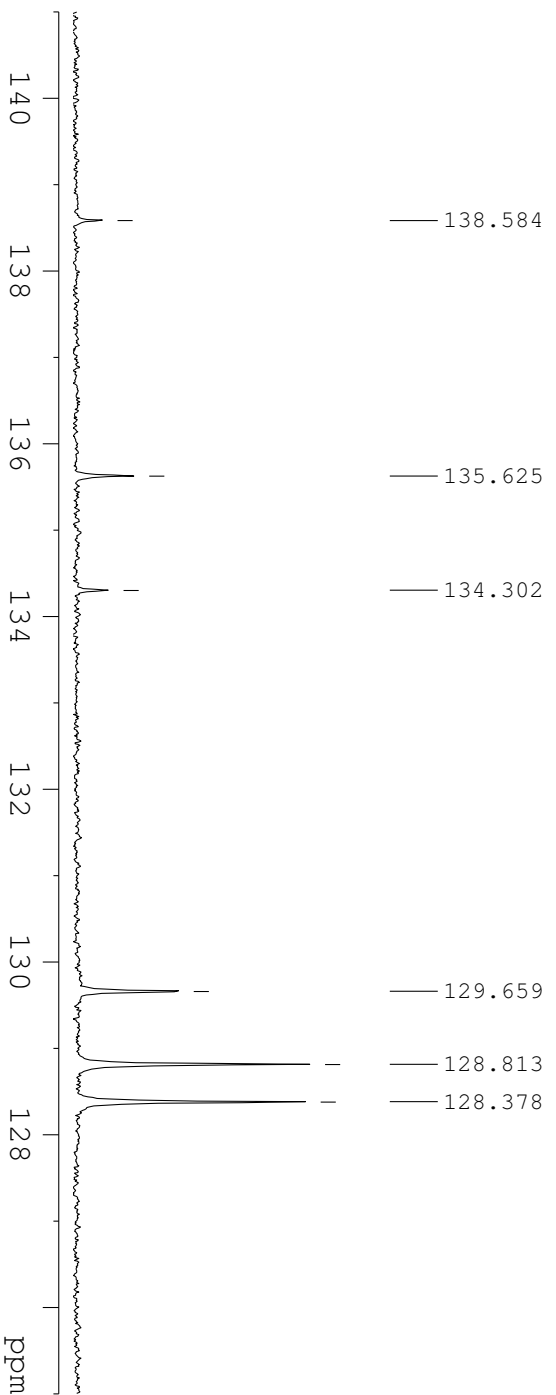

- 159.71
- 156.15
- 151.41
- 138.58
- 135.63
- 134.30
- 129.66
- 128.81
- 128.38
- 121.47
- 115.24
- 112.51
- 105.18
- 103.15

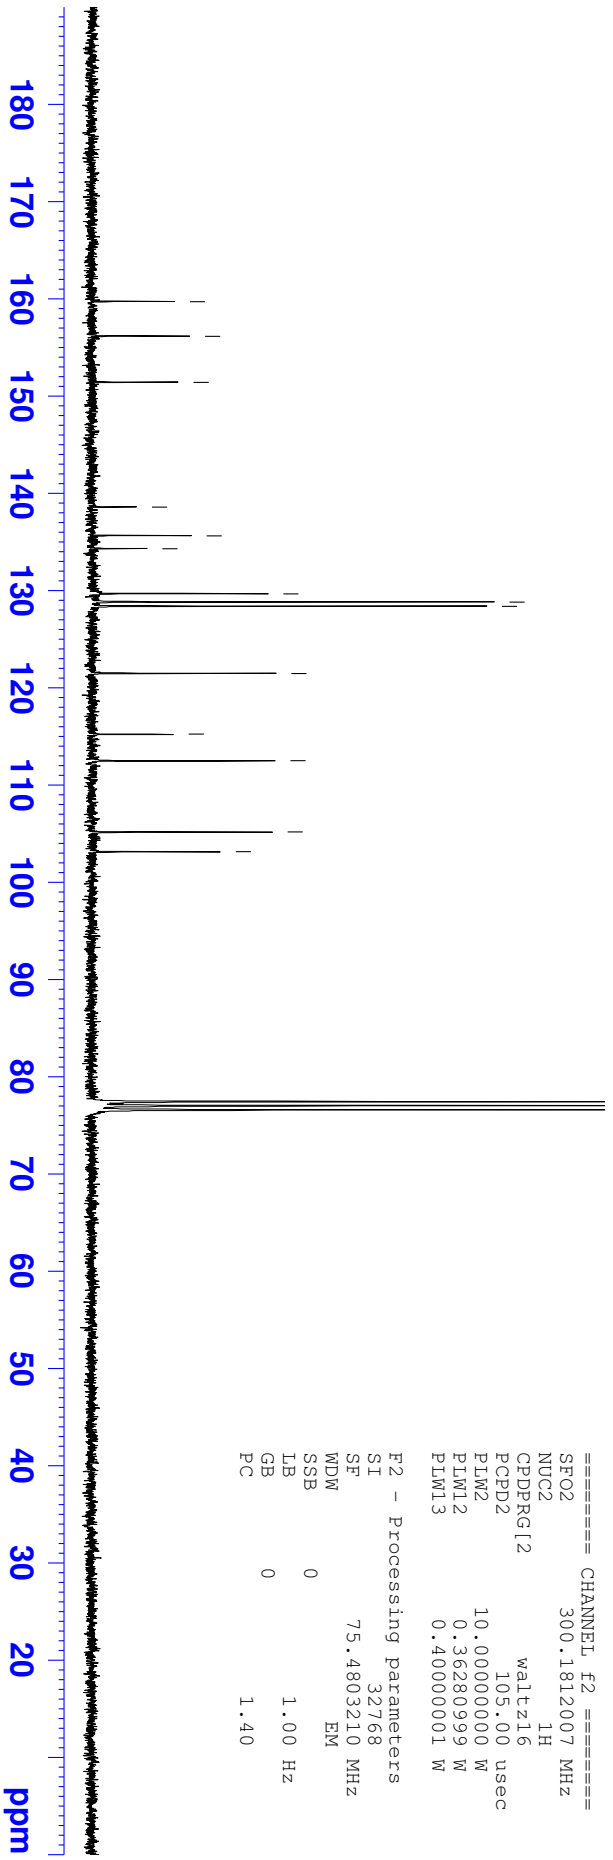

## Atlantic Microlab, Inc.

Sample No. 78FF  
 6180 Atlantic Blvd. Suite M  
 Norcross, GA 30071  
 www.atlanticmicrolab.com

Company/School Xavier University of Louisiana  
 Dept. Chemistry  
 Address 1 Drexel Dr  
 City, State, Zip New Orleans, LA 70125

Professor/Supervisor: Dr Maryam Foroozesh Name Jiawang Liu Date 08/19/2014  
 PO# / CC# P0050279 Phone (504) 638-4036

| Element | Theory | Found |       | Single <input type="checkbox"/>                                                                                                                                                                                                                                                                                                                                                                                                                                                                                                   | Duplicate <input checked="" type="checkbox"/> |
|---------|--------|-------|-------|-----------------------------------------------------------------------------------------------------------------------------------------------------------------------------------------------------------------------------------------------------------------------------------------------------------------------------------------------------------------------------------------------------------------------------------------------------------------------------------------------------------------------------------|-----------------------------------------------|
| C       | 78.25  | 78.05 | 77.95 | Elements Present: C, H, O<br>Analyze for: C, H<br>Hygroscopic <input type="checkbox"/> Explosive <input type="checkbox"/><br>M.P. _____ B.P. _____<br>To be dried: Yes <input type="checkbox"/> No <input checked="" type="checkbox"/><br>Temp. _____ Vac. _____ Time _____<br>Rush Service <input type="checkbox"/> <small>Rush service guarantees analyses will be completed and results available by 5 PM EST on the day the sample is received by 11 AM.</small><br>Include Email Address or FAX # Below<br>mforooze@xula.edu |                                               |
| H       | 4.38   | 4.48  | 4.41  |                                                                                                                                                                                                                                                                                                                                                                                                                                                                                                                                   |                                               |
|         |        |       |       |                                                                                                                                                                                                                                                                                                                                                                                                                                                                                                                                   |                                               |
|         |        |       |       |                                                                                                                                                                                                                                                                                                                                                                                                                                                                                                                                   |                                               |

Date Received AUG 25 P.M. Date Completed AUG 26 2014  
 Remarks: \_\_\_\_\_

## Atlantic Microlab, Inc.

Sample No. 5H78FF  
 6180 Atlantic Blvd. Suite M  
 Norcross, GA 30071  
 www.atlanticmicrolab.com

Company/School Xavier University of Louisiana  
 Dept. Chemistry  
 Address 1 Drexel Dr  
 City, State, Zip New Orleans, LA 70125

Professor/Supervisor: Dr Maryam Foroozesh Name Jiawang Liu Date 08/19/2014  
 PO# / CC# P0050279 Phone (504) 638-4036

| Element | Theory | Found |       | Single <input type="checkbox"/>                                                                                                                                                                                                                                                                                                                                                                                                                                                                                                   | Duplicate <input checked="" type="checkbox"/> |
|---------|--------|-------|-------|-----------------------------------------------------------------------------------------------------------------------------------------------------------------------------------------------------------------------------------------------------------------------------------------------------------------------------------------------------------------------------------------------------------------------------------------------------------------------------------------------------------------------------------|-----------------------------------------------|
| C       | 73.77  | 73.42 | 73.47 | Elements Present: C, H, O<br>Analyze for: C, H<br>Hygroscopic <input type="checkbox"/> Explosive <input type="checkbox"/><br>M.P. _____ B.P. _____<br>To be dried: Yes <input type="checkbox"/> No <input checked="" type="checkbox"/><br>Temp. _____ Vac. _____ Time _____<br>Rush Service <input type="checkbox"/> <small>Rush service guarantees analyses will be completed and results available by 5 PM EST on the day the sample is received by 11 AM.</small><br>Include Email Address or FAX # Below<br>mforooze@xula.edu |                                               |
| H       | 4.14   | 4.14  | 4.22  |                                                                                                                                                                                                                                                                                                                                                                                                                                                                                                                                   |                                               |
|         |        |       |       |                                                                                                                                                                                                                                                                                                                                                                                                                                                                                                                                   |                                               |
|         |        |       |       |                                                                                                                                                                                                                                                                                                                                                                                                                                                                                                                                   |                                               |

Date Received AUG 25 P.M. Date Completed AUG 26 2014  
 Remarks: \_\_\_\_\_

## Atlantic Microlab, Inc.

Sample No. 78PyF  
 6180 Atlantic Blvd. Suite M  
 Norcross, GA 30071  
 www.atlanticmicrolab.com  
 Company/School Xavier University of Louisiana  
 Dept. Chemistry  
 Address 1 Drexel Dr  
 City, State, Zip New Orleans, LA 70125  
 Professor/Supervisor: Dr Maryam Foroozesh Name Jiawang Liu Date 08/29/2014  
 PO# / CC# P0050279 Phone (504) 638-4036

| Element | Theory | Found |       | Single <input type="checkbox"/> Duplicate <input checked="" type="checkbox"/>                                                                                                         |              |
|---------|--------|-------|-------|---------------------------------------------------------------------------------------------------------------------------------------------------------------------------------------|--------------|
|         |        |       |       | Elements Present:                                                                                                                                                                     | Analyze for: |
| C       | 79.11  | 77.73 | 77.82 | C, H, O, N                                                                                                                                                                            |              |
| H       | 4.06   | 4.37  | 4.29  | C, H, N                                                                                                                                                                               |              |
| N       | 5.13   | 4.98  | 4.91  | Hygroscopic <input type="checkbox"/> Explosive <input type="checkbox"/>                                                                                                               |              |
|         |        |       |       | M.P. _____ B.P. _____                                                                                                                                                                 |              |
|         |        |       |       | To be dried: Yes <input type="checkbox"/> No <input checked="" type="checkbox"/>                                                                                                      |              |
|         |        |       |       | Temp. _____ Vac. _____ Time _____                                                                                                                                                     |              |
|         |        |       |       | Rush Service <input type="checkbox"/> <small>Rush service guarantees analyses will be completed and results available by 5 PM EST on the day the sample is received by 11 AM.</small> |              |
|         |        |       |       | Include Email Address or FAX # Below                                                                                                                                                  |              |
|         |        |       |       | mforooze@xula.edu                                                                                                                                                                     |              |

Date Received SEP 22 P.M. Date Completed SEP 23 2014

Remarks:

## Atlantic Microlab, Inc.

Sample No. 78DOF  
 6180 Atlantic Blvd. Suite M  
 Norcross, GA 30071  
 www.atlanticmicrolab.com  
 Company/School Xavier University of Louisiana  
 Dept. Chemistry  
 Address 1 Drexel Dr  
 City, State, Zip New Orleans, LA 70125  
 Professor/Supervisor: Dr Maryam Foroozesh Name Jiawang Liu Date 08/19/2014  
 PO# / CC# P0050279 Phone (504) 638-4036

| Element | Theory | Found |       | Single <input type="checkbox"/> Duplicate <input checked="" type="checkbox"/>                                                                                                         |              |
|---------|--------|-------|-------|---------------------------------------------------------------------------------------------------------------------------------------------------------------------------------------|--------------|
|         |        |       |       | Elements Present:                                                                                                                                                                     | Analyze for: |
| C       | 72.18  | 71.92 | 71.97 | C, H, O                                                                                                                                                                               |              |
| H       | 3.79   | 3.87  | 3.85  | C, H                                                                                                                                                                                  |              |
|         |        |       |       | Hygroscopic <input type="checkbox"/> Explosive <input type="checkbox"/>                                                                                                               |              |
|         |        |       |       | M.P. _____ B.P. _____                                                                                                                                                                 |              |
|         |        |       |       | To be dried: Yes <input type="checkbox"/> No <input checked="" type="checkbox"/>                                                                                                      |              |
|         |        |       |       | Temp. _____ Vac. _____ Time _____                                                                                                                                                     |              |
|         |        |       |       | Rush Service <input type="checkbox"/> <small>Rush service guarantees analyses will be completed and results available by 5 PM EST on the day the sample is received by 11 AM.</small> |              |
|         |        |       |       | Include Email Address or FAX # Below                                                                                                                                                  |              |
|         |        |       |       | mforooze@xula.edu                                                                                                                                                                     |              |

Date Received AUG 25 P.M. Date Completed AUG 26 2014

Remarks:

## Atlantic Microlab, Inc.

Sample No. 4P78PC  
 6180 Atlantic Blvd. Suite M  
 Norcross, GA 30071  
 www.atlanticmicrolab.com

Company/School Xavier University of Louisiana  
 Dept. Chemistry  
 Address 1 Drexel Dr  
 City, State, Zip New Orleans, LA 70125

Professor/Supervisor: Dr Maryam Foroozesh  
 PO# / CC# P0050279

Name Jiawang Liu Date 08/19/2014  
 Phone (504) 638-4036

| Element | Theory | Found |       | Single <input type="checkbox"/>                                                                                                                                                       | Duplicate <input checked="" type="checkbox"/> |
|---------|--------|-------|-------|---------------------------------------------------------------------------------------------------------------------------------------------------------------------------------------|-----------------------------------------------|
|         |        |       |       | Elements Present: C, H, O                                                                                                                                                             |                                               |
| C       | 78.25  | 78.23 | 78.11 | Analyze for: C, H                                                                                                                                                                     |                                               |
| H       | 4.38   | 4.48  | 4.43  | Hygroscopic <input type="checkbox"/> Explosive <input type="checkbox"/>                                                                                                               |                                               |
|         |        |       |       | M.P. _____ B.P. _____                                                                                                                                                                 |                                               |
|         |        |       |       | To be dried: Yes <input type="checkbox"/> No <input checked="" type="checkbox"/>                                                                                                      |                                               |
|         |        |       |       | Temp. _____ Vac. _____ Time _____                                                                                                                                                     |                                               |
|         |        |       |       | Rush Service <input type="checkbox"/> <small>Rush service guarantees analyses will be completed and results available by 5 PM EST on the day the sample is received by 11 AM.</small> |                                               |
|         |        |       |       | Include Email Address or FAX # Below<br>mforooze@xula.edu                                                                                                                             |                                               |

Date Received AUG 25 P.M. Date Completed AUG 26 2014  
 Remarks:

## Atlantic Microlab, Inc.

Sample No. 3M4P78PC  
 6180 Atlantic Blvd. Suite M  
 Norcross, GA 30071  
 www.atlanticmicrolab.com

Company/School Xavier University of Louisiana  
 Dept. Chemistry  
 Address 1 Drexel Dr  
 City, State, Zip New Orleans, LA 70125

Professor/Supervisor: Dr Maryam Foroozesh  
 PO# / CC# P0050279

Name Jiawang Liu Date 08/19/2014  
 Phone (504) 638-4036

| Element | Theory | Found |       | Single <input type="checkbox"/>                                                                                                                                                       | Duplicate <input checked="" type="checkbox"/> |
|---------|--------|-------|-------|---------------------------------------------------------------------------------------------------------------------------------------------------------------------------------------|-----------------------------------------------|
|         |        |       |       | Elements Present: C, H, O                                                                                                                                                             |                                               |
| C       | 78.61  | 77.07 | 77.12 | Analyze for: C, H                                                                                                                                                                     |                                               |
| H       | 4.86   | 5.03  | 5.08  | Hygroscopic <input type="checkbox"/> Explosive <input type="checkbox"/>                                                                                                               |                                               |
|         |        |       |       | M.P. _____ B.P. _____                                                                                                                                                                 |                                               |
|         |        |       |       | To be dried: Yes <input type="checkbox"/> No <input checked="" type="checkbox"/>                                                                                                      |                                               |
|         |        |       |       | Temp. _____ Vac. _____ Time _____                                                                                                                                                     |                                               |
|         |        |       |       | Rush Service <input type="checkbox"/> <small>Rush service guarantees analyses will be completed and results available by 5 PM EST on the day the sample is received by 11 AM.</small> |                                               |
|         |        |       |       | Include Email Address or FAX # Below<br>mforooze@xula.edu                                                                                                                             |                                               |

Date Received AUG 25 P.M. Date Completed AUG 26 2014  
 Remarks:

## Atlantic Microlab, Inc.

Sample No. 4M78PC  
 6180 Atlantic Blvd. Suite M  
 Norcross, GA 30071  
 www.atlanticmicrolab.com

Company/School Xavier University of Louisiana  
 Dept. Chemistry  
 Address 1 Drexel Dr  
 City, State, Zip New Orleans, LA 70125

Professor/Supervisor: Dr Maryam Foroozesh  
 PO# / CC# P0050279

Name Jiawang Liu Date 08/19/2014  
 Phone (504) 638-4036

| Element | Theory | Found |       | Single <input type="checkbox"/>                                                                                                                                                       | Duplicate <input checked="" type="checkbox"/> |
|---------|--------|-------|-------|---------------------------------------------------------------------------------------------------------------------------------------------------------------------------------------|-----------------------------------------------|
|         |        |       |       | Elements Present: C, H, O                                                                                                                                                             |                                               |
| C       | 72.89  | 72.61 | 72.62 | Analyze for: C, H                                                                                                                                                                     |                                               |
| H       | 4.71   | 4.74  | 4.67  | Hygroscopic <input type="checkbox"/> Explosive <input type="checkbox"/>                                                                                                               |                                               |
|         |        |       |       | M.P. _____ B.P. _____                                                                                                                                                                 |                                               |
|         |        |       |       | To be dried: Yes <input type="checkbox"/> No <input checked="" type="checkbox"/>                                                                                                      |                                               |
|         |        |       |       | Temp. _____ Vac. _____ Time _____                                                                                                                                                     |                                               |
|         |        |       |       | Rush Service <input type="checkbox"/> <small>Rush service guarantees analyses will be completed and results available by 5 PM EST on the day the sample is received by 11 AM.</small> |                                               |
|         |        |       |       | Include Email Address or FAX # Below                                                                                                                                                  |                                               |
|         |        |       |       | mforooze@xula.edu                                                                                                                                                                     |                                               |

Date Received AUG 25 P.M. Date Completed AUG 26 2014  
 Remarks: \_\_\_\_\_

## Atlantic Microlab, Inc.

Sample No. 4TF78PC  
 6180 Atlantic Blvd. Suite M  
 Norcross, GA 30071  
 www.atlanticmicrolab.com

Company/School Xavier University of Louisiana  
 Dept. Chemistry  
 Address 1 Drexel Dr  
 City, State, Zip New Orleans, LA 70125

Professor/Supervisor: Dr Maryam Foroozesh  
 PO# / CC# P0050279

Name Jiawang Liu Date 08/19/2014  
 Phone (504) 638-4036

| Element | Theory | Found |       | Single <input type="checkbox"/>                                                                                                                                                       | Duplicate <input checked="" type="checkbox"/> |
|---------|--------|-------|-------|---------------------------------------------------------------------------------------------------------------------------------------------------------------------------------------|-----------------------------------------------|
|         |        |       |       | Elements Present: C, H, O, F                                                                                                                                                          |                                               |
| C       | 58.22  | 57.99 | 57.96 | Analyze for: C, H, F                                                                                                                                                                  |                                               |
| H       | 2.63   | 2.47  | 2.46  | Hygroscopic <input type="checkbox"/> Explosive <input type="checkbox"/>                                                                                                               |                                               |
| F       | 21.25  | 21.12 | 21.12 | M.P. _____ B.P. _____                                                                                                                                                                 |                                               |
|         |        |       |       | To be dried: Yes <input type="checkbox"/> No <input checked="" type="checkbox"/>                                                                                                      |                                               |
|         |        |       |       | Temp. _____ Vac. _____ Time _____                                                                                                                                                     |                                               |
|         |        |       |       | Rush Service <input type="checkbox"/> <small>Rush service guarantees analyses will be completed and results available by 5 PM EST on the day the sample is received by 11 AM.</small> |                                               |
|         |        |       |       | Include Email Address or FAX # Below                                                                                                                                                  |                                               |
|         |        |       |       | mforooze@xula.edu                                                                                                                                                                     |                                               |

Date Received AUG 25 P.M. Date Completed AUG 26 2014  
 Remarks: \_\_\_\_\_

## Atlantic Microlab, Inc.

Sample No. 4P78FC  
 6180 Atlantic Blvd. Suite M  
 Norcross, GA 30071  
 www.atlanticmicrolab.com  
 Company/School Xavier University of Louisiana  
 Dept. Chemistry  
 Address 1 Drexel Dr  
 City, State, Zip New Orleans, LA 70125  
 Professor/Supervisor: Dr Maryam Foroozesh  
 PO# / CC# P0050279  
 Name Jlawang Liu Date 08/28/2014  
 Phone (504) 638-4036

| Element | Theory | Found |       | Single <input type="checkbox"/> Duplicate <input checked="" type="checkbox"/><br>Elements Present: <u>C, H, O</u><br>Analyze for: <u>C, H</u><br>Hygroscopic <input type="checkbox"/> Explosive <input type="checkbox"/><br>M.P. _____ B.P. _____<br>To be dried: Yes <input type="checkbox"/> No <input checked="" type="checkbox"/><br>Temp. _____ Vac. _____ Time _____<br>Rush Service <input type="checkbox"/> <small>Rush service guarantees analyses will be completed and results available by 5 PM EST on the day the sample is received by 11 AM.</small><br>Include Email Address or FAX # Below<br>mforooze@xula.edu |
|---------|--------|-------|-------|----------------------------------------------------------------------------------------------------------------------------------------------------------------------------------------------------------------------------------------------------------------------------------------------------------------------------------------------------------------------------------------------------------------------------------------------------------------------------------------------------------------------------------------------------------------------------------------------------------------------------------|
| C       | 78.25  | 77.76 | 77.64 |                                                                                                                                                                                                                                                                                                                                                                                                                                                                                                                                                                                                                                  |
| H       | 4.38   | 4.49  | 4.54  |                                                                                                                                                                                                                                                                                                                                                                                                                                                                                                                                                                                                                                  |
|         |        |       |       |                                                                                                                                                                                                                                                                                                                                                                                                                                                                                                                                                                                                                                  |
|         |        |       |       |                                                                                                                                                                                                                                                                                                                                                                                                                                                                                                                                                                                                                                  |

Date Received SEP 2 2 P.M. Date Completed SEP 2 3 2014  
 Remarks: \_\_\_\_\_

## Atlantic Microlab, Inc.

Sample No. 3M4P78FC  
 6180 Atlantic Blvd. Suite M  
 Norcross, GA 30071  
 www.atlanticmicrolab.com  
 Company/School Xavier University of Louisiana  
 Dept. Chemistry  
 Address 1 Drexel Dr  
 City, State, Zip New Orleans, LA 70125  
 Professor/Supervisor: Dr Maryam Foroozesh  
 PO# / CC# P0050279  
 Name Jlawang Liu Date 08/28/2014  
 Phone (504) 638-4036

| Element | Theory | Found |       | Single <input type="checkbox"/> Duplicate <input checked="" type="checkbox"/><br>Elements Present: <u>C, H, O</u><br>Analyze for: <u>C, H</u><br>Hygroscopic <input type="checkbox"/> Explosive <input type="checkbox"/><br>M.P. _____ B.P. _____<br>To be dried: Yes <input type="checkbox"/> No <input checked="" type="checkbox"/><br>Temp. _____ Vac. _____ Time _____<br>Rush Service <input type="checkbox"/> <small>Rush service guarantees analyses will be completed and results available by 5 PM EST on the day the sample is received by 11 AM.</small><br>Include Email Address or FAX # Below<br>mforooze@xula.edu |
|---------|--------|-------|-------|----------------------------------------------------------------------------------------------------------------------------------------------------------------------------------------------------------------------------------------------------------------------------------------------------------------------------------------------------------------------------------------------------------------------------------------------------------------------------------------------------------------------------------------------------------------------------------------------------------------------------------|
| C       | 78.61  | 78.24 | 78.31 |                                                                                                                                                                                                                                                                                                                                                                                                                                                                                                                                                                                                                                  |
| H       | 4.86   | 5.14  | 5.17  |                                                                                                                                                                                                                                                                                                                                                                                                                                                                                                                                                                                                                                  |
|         |        |       |       |                                                                                                                                                                                                                                                                                                                                                                                                                                                                                                                                                                                                                                  |
|         |        |       |       |                                                                                                                                                                                                                                                                                                                                                                                                                                                                                                                                                                                                                                  |

Date Received SEP 2 2 P.M. Date Completed SEP 2 3 2014  
 Remarks: \_\_\_\_\_

## Atlantic Microlab, Inc.

Sample No. 4M78FC  
 6180 Atlantic Blvd. Suite M  
 Norcross, GA 30071  
 www.atlanticmicrolab.com  
 Company/School Xavier University of Louisiana  
 Dept. Chemistry  
 Address 1 Drexel Dr  
 City, State, Zip New Orleans, LA 70125  
 Professor/Supervisor: Dr Maryam Foroozesh Name Jiawang Liu Date 08/28/2014  
 PO# / CC# P0050279 Phone (504) 638-4036

| Element       | Theory | Found       |       | Single <input type="checkbox"/> Duplicate <input checked="" type="checkbox"/>                                                                                                         |              |
|---------------|--------|-------------|-------|---------------------------------------------------------------------------------------------------------------------------------------------------------------------------------------|--------------|
|               |        |             |       | Elements Present:                                                                                                                                                                     | Analyze for: |
| C             | 72.89  | 72.51       | 72.63 | C, H, O                                                                                                                                                                               |              |
| H             | 4.71   | 4.96        | 5.03  | C, H                                                                                                                                                                                  |              |
|               |        |             |       | Hygroscopic <input type="checkbox"/> Explosive <input type="checkbox"/>                                                                                                               |              |
|               |        |             |       | M.P. _____ B.P. _____                                                                                                                                                                 |              |
|               |        |             |       | To be dried: Yes <input type="checkbox"/> No <input checked="" type="checkbox"/>                                                                                                      |              |
|               |        |             |       | Temp. _____ Vac. _____ Time _____                                                                                                                                                     |              |
|               |        |             |       | Rush Service <input type="checkbox"/> <small>Rush service guarantees analyses will be completed and results available by 5 PM EST on the day the sample is received by 11 AM.</small> |              |
|               |        |             |       | Include Email Address or FAX # Below                                                                                                                                                  |              |
|               |        |             |       | mforooze@xula.edu                                                                                                                                                                     |              |
| Date Received |        | SEP 22 P.M. |       | Date Completed                                                                                                                                                                        |              |
| Remarks:      |        |             |       | SEP 23 2014                                                                                                                                                                           |              |

## Atlantic Microlab, Inc.

Sample No. 4TF78FC  
 6180 Atlantic Blvd. Suite M  
 Norcross, GA 30071  
 www.atlanticmicrolab.com  
 Company/School Xavier University of Louisiana  
 Dept. Chemistry  
 Address 1 Drexel Dr  
 City, State, Zip New Orleans, LA 70125  
 Professor/Supervisor: Dr Maryam Foroozesh Name Jiawang Liu Date 08/28/2014  
 PO# / CC# P0050279 Phone (504) 638-4036

| Element       | Theory | Found       |       | Single <input type="checkbox"/> Duplicate <input checked="" type="checkbox"/>                                                                                                         |              |
|---------------|--------|-------------|-------|---------------------------------------------------------------------------------------------------------------------------------------------------------------------------------------|--------------|
|               |        |             |       | Elements Present:                                                                                                                                                                     | Analyze for: |
| C             | 58.22  | 58.17       | 58.14 | C, H, O, F                                                                                                                                                                            |              |
| H             | 2.63   | 2.51        | 2.64  | C, H, F                                                                                                                                                                               |              |
| F             | 21.25  | 21.48       | 21.42 | Hygroscopic <input type="checkbox"/> Explosive <input type="checkbox"/>                                                                                                               |              |
|               |        |             |       | M.P. _____ B.P. _____                                                                                                                                                                 |              |
|               |        |             |       | To be dried: Yes <input type="checkbox"/> No <input checked="" type="checkbox"/>                                                                                                      |              |
|               |        |             |       | Temp. _____ Vac. _____ Time _____                                                                                                                                                     |              |
|               |        |             |       | Rush Service <input type="checkbox"/> <small>Rush service guarantees analyses will be completed and results available by 5 PM EST on the day the sample is received by 11 AM.</small> |              |
|               |        |             |       | Include Email Address or FAX # Below                                                                                                                                                  |              |
|               |        |             |       | mforooze@xula.edu                                                                                                                                                                     |              |
| Date Received |        | SEP 22 P.M. |       | Date Completed                                                                                                                                                                        |              |
| Remarks:      |        |             |       | SEP 23 2014                                                                                                                                                                           |              |

## Atlantic Microlab, Inc.

Sample No. 4M78PyC  
 6180 Atlantic Blvd. Suite M  
 Norcross, GA 30071  
 www.atlanticmicrolab.com  
 Company/School Xavier University of Louisiana  
 Dept. Chemistry  
 Address 1 Drexel Dr  
 City, State, Zip New Orleans, LA 70125  
 Professor/Supervisor: Dr Maryam Foroozesh Name Jlawang Liu Date 08/28/2014  
 PO# / CC# P0050279 Phone (504) 638-4036

| Element | Theory | Found |       | Single <input type="checkbox"/> Duplicate <input checked="" type="checkbox"/>                                                                                                         |              |
|---------|--------|-------|-------|---------------------------------------------------------------------------------------------------------------------------------------------------------------------------------------|--------------|
|         |        |       |       | Elements Present:                                                                                                                                                                     | Analyze for: |
| C       | 73.92  | 71.44 | 71.58 | C, H, O, N                                                                                                                                                                            |              |
| H       | 4.29   | 4.44  | 4.50  | C, H, N                                                                                                                                                                               |              |
| N       | 6.63   | 6.31  | 6.23  | Hygroscopic <input type="checkbox"/> Explosive <input type="checkbox"/>                                                                                                               |              |
|         |        |       |       | M.P. _____ B.P. _____                                                                                                                                                                 |              |
|         |        |       |       | To be dried: Yes <input type="checkbox"/> No <input checked="" type="checkbox"/>                                                                                                      |              |
|         |        |       |       | Temp. _____ Vac. _____ Time _____                                                                                                                                                     |              |
|         |        |       |       | Rush Service <input type="checkbox"/> <small>Rush service guarantees analyses will be completed and results available by 5 PM EST on the day the sample is received by 11 AM.</small> |              |
|         |        |       |       | Include Email Address or FAX # Below<br>mforooze@xula.edu                                                                                                                             |              |

Date Received SEP 22 P.M. Date Completed SEP 23 2014  
 Remarks: \_\_\_\_\_

## Atlantic Microlab, Inc.

Sample No. 4P78DOC  
 6180 Atlantic Blvd. Suite M  
 Norcross, GA 30071  
 www.atlanticmicrolab.com  
 Company/School Xavier University of Louisiana  
 Dept. Chemistry  
 Address 1 Drexel Dr  
 City, State, Zip New Orleans, LA 70125  
 Professor/Supervisor: Dr Maryam Foroozesh Name Jlawang Liu Date 08/28/2014  
 PO# / CC# P0050279 Phone (504) 638-4036

| Element | Theory | Found |       | Single <input type="checkbox"/> Duplicate <input checked="" type="checkbox"/>                                                                                                         |              |
|---------|--------|-------|-------|---------------------------------------------------------------------------------------------------------------------------------------------------------------------------------------|--------------|
|         |        |       |       | Elements Present:                                                                                                                                                                     | Analyze for: |
| C       | 72.18  | 72.11 | 71.97 | C, H, O                                                                                                                                                                               |              |
| H       | 3.79   | 4.01  | 3.91  | C, H                                                                                                                                                                                  |              |
|         |        |       |       | Hygroscopic <input type="checkbox"/> Explosive <input type="checkbox"/>                                                                                                               |              |
|         |        |       |       | M.P. _____ B.P. _____                                                                                                                                                                 |              |
|         |        |       |       | To be dried: Yes <input type="checkbox"/> No <input checked="" type="checkbox"/>                                                                                                      |              |
|         |        |       |       | Temp. _____ Vac. _____ Time _____                                                                                                                                                     |              |
|         |        |       |       | Rush Service <input type="checkbox"/> <small>Rush service guarantees analyses will be completed and results available by 5 PM EST on the day the sample is received by 11 AM.</small> |              |
|         |        |       |       | Include Email Address or FAX # Below<br>mforooze@xula.edu                                                                                                                             |              |

Date Received SEP 22 P.M. Date Completed SEP 23 2014  
 Remarks: \_\_\_\_\_



## Structures of P450 1A2 Inhibitors Used for Alignment Study

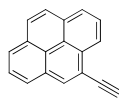

4EP

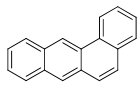

Benz[a]anthracene

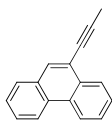

2PPh

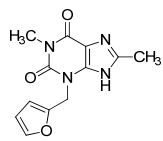

Furafylline

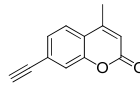

7E4MC

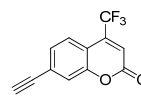

7E4TFC

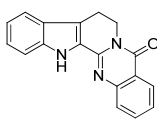

Rutacarpine

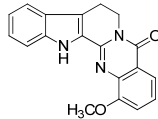

Rutacarpine derivative 5

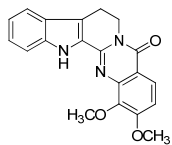

Rutacarpine derivative 8

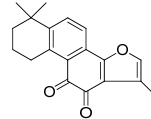

Tanshinone IIA

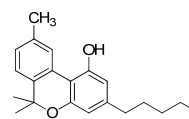

CBN

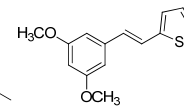

DMPVT

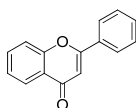

Flavone

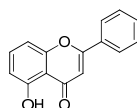

5-Hydroxyflavone (5HF)

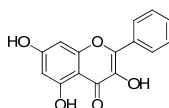

3,5,7-Trihydroxyflavone

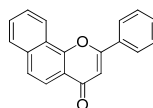

a-Naphthoflavone

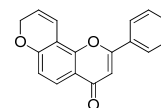

7,8-Pyranoflavone

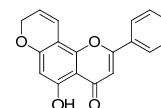

5-Hydroxy-7,8-pyranoflavone

## Alamar Blue Cell Viability Assay

HepG2 cells were plated onto 96-well plates in 100  $\mu\text{L}$ /well at  $1.2 \times 10^5$  cell/mL in DMEM with 10% FBS, and grew until they reached confluency for 72 h. The media was replaced with 100  $\mu\text{L}$  of serum-free media for another 24 h. After that, 10  $\mu\text{L}$  of Alamar Blue Dye (Invitrogen, cat#DAL1180) were added to each well of 96-well plates and incubated for 2 h at 37  $^{\circ}\text{C}$  in  $\text{CO}_2$ -incubator, and fluorescence 560Ex/590Em base reading was taken using Synergy H1 multiplate reader (BioTeck). Then, the media was removed, and 1  $\mu\text{L}$  of the compound solution in DMSO were added to 100  $\mu\text{L}$  of free serum-free media for each well. After 72 h, another Alamar Blue Dye fluorescence reading was taken. If the ratio of the second reading to the base reading for untreated cells was equal to 1 (within 10% error), the assay was considered valid, and calculations to normalize the toxicity of compounds were made. Figure S1 shows twice independent cell viability assay data. The results indicate that up to  $10^{-5}$  M compound 4TF78PC is not toxic to HepG2 cells.

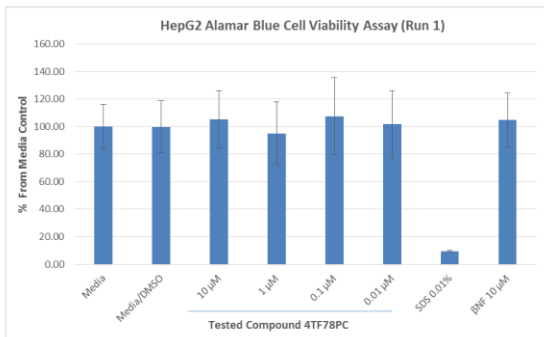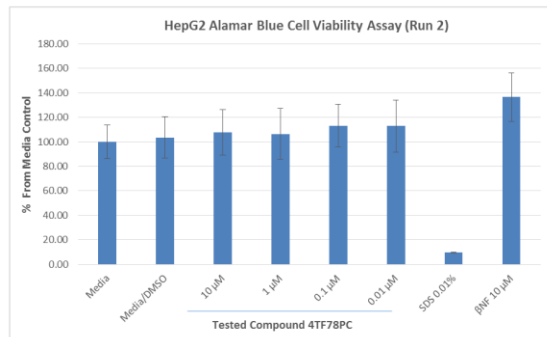

Supplement: NIHMS770948-supplement-support_1.pdf [file NIHMS770948-supplement-support_1.pdf]
